# Supplementary material for: Characteristics of Randomized Controlled Trials Designed for Elderly: A Systematic Review
Source: PLoS One. 2015 May 15;10(5):e0126709. doi: 10.1371/journal.pone.0126709 (PMC4433127; doi:10.1371/journal.pone.0126709)
Supplement: S1 Appendix — Includes the characteristics (title, authors, journal and trial characteristics) of the 1369 included publications. (XLSX) [file pone.0126709.s002.xlsx]

## Sheet: Sheet3
EntrezUID	Title	Authors	Journal	Mean age of participants	Lower cut-off value for age	Number of participants	Disease category
20298509	Craving control using nicotine replacement therapy in a teaching hospital.	Jones TE, Williams J.	Intern Med J	52.7	999	375	5
20528781	Intraoperative mitomycin C versus autologous conjunctival autograft in surgery of primary pterygium with four-year follow-up.	Koranyi G, Artzen D, Seregard S, Kopp ED.	Acta Ophthalmol	48.5	999	115	7
20708393	Effects of therapeutic lifestyle changes on peripheral artery tonometry in patients with abdominal obesity.	Ferre R, Plana N, Merino J, AragonÃ¨s G, Girona J, Heras M, Coll B, Cos R, Masana L.	Nutr Metab Cardiovasc Dis	54	30	150	4
20877300	Genome-wide association study of increasing suicidal ideation during antidepressant treatment in the GENDEP project.	Perroud N, Uher R, Ng MY, Guipponi M, Hauser J, Henigsberg N, Maier W, Mors O, Gennarelli M, Rietschel M, Souery D, Dernovsek MZ, Stamp AS, Lathrop M, Farmer A, Breen G, Aitchison KJ, Lewis CM, Craig IW, McGuffin P.	Pharmacogenomics J	41.7	999	811	5
21070566	Transanal repair for treatment of rectocele in obstructed defaecation: manual or stapled.	Mahmoud SA, Omar W, Farid M.	Colorectal Dis	44.7	999	45	11
21153642	Assessment of phonophoresis and iontophoresis in the treatment of carpal tunnel syndrome: a randomized controlled trial.	Gurcay E, Unlu E, Gurcay AG, Tuncay R, Cakci A.	Rheumatol Int	43.7	999	52	6
21155632	Multiscale assessment of treatment efficacy in adults with ADHD: a randomized placebo-controlled, multi-centre study with extended-release methylphenidate.	Retz W, Rosler M, Ose C, Scherag A, Alm B, Philipsen A, Fischer R, Ammer R; Study Group.	World J Biol Psychiatry	37.4	18	162	5
21182171	Flutter valve improves respiratory mechanics and sputum production in patients with bronchiectasis.	Figueiredo PH, Zin WA, GuimarÃ£es FS.	Physiother Res Int	47.4	999	8	10
21195592	Whole grain wheat sourdough bread does not affect plasminogen activator inhibitor-1 in adults with normal or impaired carbohydrate metabolism.	MacKay KA, Tucker AJ, Duncan AM, Graham TE, Robinson LE.	Nutr Metab Cardiovasc Dis	55	999	28	4
21227460	The importance of stressing the use of laparoscopic instruments in the initial training for laparoscopic surgery using bo- trainers: a randomized control study.	Tokunaga M, Okajima M, Egi H, Yoshimitsu M, Sumitani D, Kawahara T, Hattori M, Ohdan H.	J Surg Res	999	999	36	22
21253739	The outcomes and cost-effectiveness of intraarticular injection of the rheumatoid knee.	Chavez-Chiang NR, Sibbitt WL, Band PA, DeLea SL, Park KS, Bankhurst AD.	Rheumatol Int	50.8	999	96	13
21273285	The monitoring of gingival crevicular fluid volume during orthodontic treatment: a longitudinal randomized split-mouth study.	Drummond S, Canavarro C, Perinetti G, Teles R, Capelli J Jr.	Eur J Orthod	17.7	999	16	22
21292793	Slow infusion metoclopramide does not affect the improvement rate of nausea while reducing akathisia and sedation incidence.	Tura P, Erdur B, Aydin B, Turkcuer I, Parlak I.	Emerg Med J	31.3	18	140	19
21345681	Mobile bearing UKA compared to fi-ed bearing TKA: a randomized prospective study.	Sun PF, Jia YH.	Knee	60.5	20	56	13
21355042	A randomized, double-blind, prospective study of caspofungin vs. amphotericin B for the treatment of invasive candidiasis in newborn infants.	Mohamed WA, Ismail M.	J Trop Pediatr	0.5	999	32	16
21415232	Impact of te-t and email messaging on the se-ual health of young people: a randomised controlled trial.	Lim MS, Hocking JS, Aitken CK, Fairley CK, Jordan L, Lewis JA, Hellard ME.	J Epidemiol Community Health	19	16	994	5
21415280	Aprepitant pharmacokinetics and assessing the impact of aprepitant on cyclophosphamide metabolism in cancer patients undergoing hematopoietic stem cell transplantation.	Bubalo JS, Cherala G, McCune JS, Munar MY, Tse S, Maziarz R.	J Clin Pharmacol	46	18	40	3
21416547	Functional outcomes related to the prevention of radiation-induced -erostomia: oral pilocarpine versus submandibular salivary gland transfer.	Rieger JM, Jha N, Lam Tang JA, Harris J, Seikaly H.	Head Neck	999	18	69	2
21423036	Silicone Ahmed glaucoma valve with and without intravitreal triamcinolone acetonide for neovascular glaucoma: randomized clinical trial.	Tei-eira SH, Doi LM, Freitas Silva AL, Silva KD, Paes Ã?T, Higa FS, Mendonca M, Prata JA, Paranhos A.	J Glaucoma	59.5	17	49	7
21425346	The prevalence of dementia and depression in Taiwanese institutionalized leprosy patients, and the effectiveness evaluation of reminiscence therapy--a longitudinal, single-blind, randomized control study.	Su TW, Wu LL, Lin CP.	Int J Geriatr Psychiatry	77.4	65	129	6
21427067	Efficacy of venlafa-ine for the prevention and relief of o-aliplatin-induced acute neuroto-icity: results of EFFO-, a randomized, double-blind, placebo-controlled phase III trial.	Durand JP, Deplanque G, Montheil V, Gornet JM, Scotte F, Mir O, Cessot A, Coriat R, Raymond E, Mitry E, Herait P, Yataghene Y, Goldwasser F.	Ann Oncol	67.5	18	48	2
21450214	An open-label, randomized, multicenter, controlled study of epoetin alfa for the treatment of anemia of chronic kidney disease in the long term care setting.	Patel M, Thimons DG, Winston JL, Langholff W, McGowan T.	J Am Med Dir Assoc	84.2	18	157	14
21450377	The learning effectiveness of nursing students using online testing as an assistant tool: a cluster randomized controlled trial.	Chen HY, Chuang CH.	Nurse Educ Today	999	19	146	22
21457411	Improved functional ability and independence in activities of daily living for older adults at high risk of hospital readmission: a randomized controlled trial.	Courtney MD, Edwards HE, Chang AM, Parker AW, Finlayson K, Bradbury C, Nielsen Z.	J Eval Clin Pract	78	65	128	5
21458108	Surgical and hearing results of the circumferential subannular grafting technique in tympanoplasty: a randomized clinical study.	Mokhtarinejad F, Okhovat SA, Barzegar F.	Am J Otolaryngol	44.3	999	63	8
21492253	Dilution of botulinum toxin A in lidocaine vs. in normal saline for the treatment of primary axillary hyperhidrosis: a double-blind, randomized, comparative preliminary study.	Gulec AT.	J Eur Acad Dermatol Venereol	33	999	8	4
21496112	Effects of eccentric training on hand strength in subjects with lateral epicondylalgia: a randomized-controlled trial.	Soderberg J, Grooten WJ, Ang BO.	Scand J Med Sci Sports	49	999	42	13
21505845	Postural control and ventilatory drive during voluntary hyperventilation and carbon dio-ide rebreathing.	David P, Laval D, Terrien J, Petitjean M.	Eur J Appl Physiol	26.4	999	16	18
21507197	Analgesic effectiveness of dipyrone (metamizol) for postoperative pain after herniorrhaphy: a randomized, double-blind, dose-response study.	Chaparro LE, Lezcano W, Alvarez HD, Joaqui W.	Pain Pract	45.5	18	162	13
21512102	Effects of intensive reading intervention for eighth-grade students with persistently inadequate response to intervention.	Vaughn S, We-ler J, Lerou- A, Roberts G, Denton C, Barth A, Fletcher J.	J Learn Disabil	999	999	24153	5
21523893	Sustained clinical safety and efficacy of a biodegradable-polymer coated sirolimus-eluting stent in real-world" practice: three-year outcomes of the CREATE (Multi-Center Registry of E-CEL Biodegradable Polymer Drug Eluting Stents) study."	Han Y, Jing Q, Li Y, Yang L, Liu H, Shang -, Jiang T, Li Z, Zhang H, Yan G; Multi-Center Registry of E-CEL BiodegrAdable Polymer Drug EluTing Stents (CREATE) investigators.	Catheter Cardiovasc Interv	60.6	999	2077	9
21526339	Compression leggings modestly affect cardiovascular but not cerebrovascular responses to heat and orthostatic stress in young and older adults.	Lucas RA, Ainslie PN, Morrison SA, Cotter JD.	Age (Dordr)	49.5	999	12	9
21533880	Reinforcing the staple line during laparoscopic sleeve gastrectomy: prospective randomized clinical study comparing two different techniques. Preliminary results.	Albanopoulos K, Alevizos L, Flessas J, Menenakos E, Stamou KM, Papailiou J, Natoudi M, Zografos G, Leandros E.	Obes Surg	36	999	90	11
21546099	A spontaneous, double-blind, double-dummy cross-over study on the effects of daily vardenafil on arterial stiffness in patients with vasculogenic erectile dysfunction.	Aversa A, Letizia C, Francomano D, Bruzziches R, Natali M, Lenzi A.	Int J Cardiol	59	999	20	9
21556816	South Pacific Islanders resist type 2 diabetes: comparison of aerobic and resistance training.	Sukala WR, Page R, Rowlands DS, Krebs J, Lys I, Leikis M, Pearce J, Cheema BS.	Eur J Appl Physiol	49	999	18	4
21557368	Effect of contrast agent on the results of in vivo Â¹H MRS of breast tumors - is it clinically significant?	Baltzer PA, Gussew A, Dietzel M, Rzanny R, Gajda M, Camara O, Reichenbach JR, Kaiser WA.	NMR Biomed	53	999	62	2
21557777	Pain evaluation and control during and following the treatment of hypertrophic scars and keloids by contact and intralesional cryosurgery--a preliminary study.	Mirmovich O, Gil T, Goldin I, Lavi I, Mettanes I, Har-Shai Y.	J Eur Acad Dermatol Venereol	35.4	17	85	12
21562918	A modified two-port thoracoscopic technique versus a-illary minithoracotomy for the treatment of recurrent spontaneous pneumothora-: a prospective randomized study.	Foroulis CN, Anastasiadis K, Charokopos N, Antonitsis P, Halvatzoulis HV, Karapanagiotidis GT, Grosomanidis V, Papakonstantinou C.	Surg Endosc	31.9	999	66	10
21563952	Bacterial and salivary biomarkers predict the gingival inflammatory profile.	Lee A, Ghaname CB, Braun TM, Sugai JV, Teles RP, Loesche WJ, Kornman KS, Giannobile WV, Kinney JS.	J Periodontol	23.9	18	30	11
21566200	Pharmacological modulation of peripheral T and B lymphocytes by a selective sphingosine 1-phosphate receptor-1 modulator.	Moberly JB, Rohatagi S, Zahir H, Hsu C, Noveck RJ, Truitt KE.	J Clin Pharmacol	32.8	18	32	3
21566568	A controlled trial of erythromycin and UDCA in premature infants during parenteral nutrition in minimizing feeding intolerance and liver function abnormalities.	Gokmen T, Oguz SS, Bozdag S, Erdeve O, Uras N, Dilmen U.	J Perinatol	0.5	999	75	16
21567655	A randomized controlled trial of mindfulness-based cognitive therapy for treating tinnitus.	Philippot P, Nef F, Clauw L, de Romree M, Segal Z.	Clin Psychol Psychother	60.3	999	25	8
21568628	Depressive symptoms and their association with acute treatment outcome in first-episode schizophrenia patients: comparing treatment with risperidone and haloperidol.	Riedel M, Mayr A, Seemuller F, Maier W, Klingberg S, Heuser I, Klosterkotter J, Gastpar M, Schmitt A, Sauer H, Schneider F, Gaebel W, JÃ¤ger M, Moller HJ, Schennach-Wolff R.	World J Biol Psychiatry	29.9	18	274	5
21573917	Survival benefit of bursectomy in patients with resectable gastric cancer: interim analysis results of a randomized controlled trial.	Fujita J, Kurokawa Y, Sugimoto T, Miyashiro I, Iijima S, Kimura Y, Takiguchi S, Fujiwara Y, Mori M, Doki Y.	Gastric Cancer	64	20	210	2
21573944	Health literacy and breast cancer screening among Mexican American women in South Texas.	PagÃ¡n JA, Brown CJ, Asch DA, Armstrong K, Bastida E, Guerra C.	J Cancer Educ	999	40	722	2
21586498	The effect of music therapy on hospitalized psychiatric patients' an-iety, finger temperature, and electroencephalography: a randomized clinical trial.	Yang CY, Chen CH, Chu H, Chen WC, Lee TY, Chen SG, Chou KR.	Biol Res Nurs	44.7	999	24	5
21590327	Comparative trial of two intravenous doses of granisetron (1 versus 3 mg) in the prevention of chemotherapy-induced acute emesis: a double-blind, randomized, non-inferiority trial.	Tsuji D, Kim YI, Taku K, Nakagaki S, Ikematsu Y, Tsubota H, Maeda M, Hashimoto N, Kimura M, Daimon T.	Support Care Cancer	61.5	20	359	2
21603966	Clinical effectiveness of a one-step self-etch adhesive in non-carious cervical lesions at 2 years.	Ermis RB, Van Landuyt KL, Cardoso MV, De Munck J, Van Meerbeek B, Peumans M.	Clin Oral Investig	50	999	26	22
21610201	Safety, tolerability, pharmacokinetics, and pharmacodynamic properties of the GPR40 agonist TAK-875: results from a double-blind, placebo-controlled single oral dose rising study in healthy volunteers.	Naik H, Vakilynejad M, Wu J, Viswanathan P, Dote N, Higuchi T, Leifke E.	J Clin Pharmacol	35	18	60	4
21617973	Efficacy of low-level laser therapy in the management of pain, facial swelling, and postoperative trismus after a lower third molar e-traction. A preliminary study.	LÃ³pez-RamÃ­rez M, VÃ­lchez-Perez MA, Gargallo-Albiol J, Arnabat-DomÃ­nguez J, Gay-Escoda C.	Lasers Med Sci	23.4	18	40	22
21625252	Cytidine deaminase single-nucleotide polymorphism is predictive of to-icity from gemcitabine in patients with pancreatic cancer: RTOG 9704.	Farrell JJ, Bae K, Wong J, Guha C, Dicker AP, Elsaleh H.	Pharmacogenomics J	61.5	999	451	2
21626051	A drug interaction study evaluating the pharmacokinetics and to-icity of sorafenib in combination with capecitabine.	Infante JR, Jones SF, Bendell JC, Greco FA, Yardley DA, Lane CM, Spigel DR, Hainsworth JD, Burris HA 3rd.	Cancer Chemother Pharmacol	63	18	32	2
21627741	Gastro-oesophageal reflu- and respiratory symptoms in Busselton adults: the effects of bodyweight and sleep apnoea.	Mulrennan SA, Knuiman MW, Divitini ML, Cullen DJ, Hunter M, Hui J, Musk AW, James AL.	Intern Med J	55.2	999	2862	11
21639596	The effects of alcohol and dosage-set on risk-seeking behavior in groups and individuals.	Sayette MA, Dimoff JD, Levine JM, Moreland RL, Votruba-Drzal E.	Psychol Addict Behav	22.4	21	720	5
21647559	Ischemic preconditioning prior to intermittent Pringle maneuver in liver resections.	Winbladh A, Bjornsson B, Trulsson L, Offenbartl K, Gullstrand P, Sandstrom P.	J Hepatobiliary Pancreat Sci	63.8	999	32	11
21655909	Histological and immunohistochemical evaluation of the peri-implant soft tissues around machined and acid-etched titanium healing abutments: a prospective randomised study.	Degidi M, Artese L, Piattelli A, Scarano A, Shibli JA, Piccirilli M, Perrotti V, Iezzi G.	Clin Oral Investig	49	999	11	22
21659435	Patients with obstructive sleep apnea syndrome benefit from acetazolamide during an altitude sojourn: a randomized, placebo-controlled, double-blind trial.	Nussbaumer-Ochsner Y, Latshang TD, Ulrich S, Kohler M, Thurnheer R, Bloch KE.	Chest	64	20	45	11
21660669	Light treatment prevents fatigue in women undergoing chemotherapy for breast cancer.	Ancoli-Israel S, Rissling M, Neikrug A, Trofimenko V, Natarajan L, Parker BA, Lawton S, Desan P, Liu L.	Support Care Cancer	54	999	39	2
21666531	A multicenter randomized controlled trial comparing effectiveness of two nasal continuous positive airway pressure devices in very-low-birth-weight infants.	Bober K, Å?wietliÅ?ski J, Zejda J, Kornacka K, Pawlik D, Behrendt J, Gajewska E, CzyÅ¼ewska M, Korbal P, Witalis J, Walas W, WiliÅ?ska M, TurzaÅ?ska A, ZieliÅ?ski G, CzeszyÅ?ska B, Bachman T.	Pediatr Crit Care Med	0	999	276	16
21667181	Single- versus double-bundle ACL reconstruction: is there any difference in stability and function at 3-year followup?	Gobbi A, Mahajan V, Karnatzikos G, Nakamura N.	Clin Orthop Relat Res	30.4	999	60	13
21671413	Are the benefits of a high-intensity progressive resistance training program sustained in rheumatoid arthritis patients? A 3-year followup study.	Lemmey AB, Williams SL, Marcora SM, Jones J, Maddison PJ.	Arthritis Care Res (Hoboken)	57.6	999	18	13
21680782	A novel PEGylated interferon beta-1a for multiple sclerosis: safety, pharmacology, and biology.	Hu -, Miller L, Richman S, Hitchman S, Glick G, Liu S, Zhu Y, Crossman M, Nestorov I, Gronke RS, Baker DP, Rogge M, Subramanyam M, Davar G.	J Clin Pharmacol	30	999	129	6
21684040	Non-invasive brain stimulation improves object-location learning in the elderly.	Floel A, Suttorp W, Kohl O, Kurten J, Lohmann H, Breitenstein C, Knecht S.	Neurobiol Aging	62.1	999	20	6
21685814	Intrahospital weight and aerobic training in children with cystic fibrosis: a randomized controlled trial.	Santana Sosa E, Groeneveld IF, Gonzalez-Saiz L, LÃ³pez-Mojares LM, Villa-Asensi JR, Barrio Gonzalez MI, Fleck SJ, Perez M, Lucia A.	Med Sci Sports E-erc	10.5	5	13	10
21685819	Water ingestion improves performance compared with mouth rinse in dehydrated subjects.	Arnaoutis G, Kavouras SA, Christaki I, Sidossis LS.	Med Sci Sports E-erc	25.9	999	10	4
21695523	Muscle ceramide content is similar after 3 weeks' consumption of fat or carbohydrate diet in a crossover design in patients with type 2 diabetes.	Helge JW, Tobin L, Drachmann T, Hellgren LI, Dela F, Galbo H.	Eur J Appl Physiol	58.7	999	11	4
21707451	Effect of fish oil supplementation in pregnancy on the fatty acid composition of erythrocyte phospholipids and breast milk lipids.	Ribeiro P, Carvalho FD, Abreu Ade A, Sant'anna Mde T, Lima RJ, Carvalho Pde O.	Int J Food Sci Nutr	999	20	11	4
21715117	Preoperative assessment of longitudinal e-tent of bile duct cancers using MDCT with multiplanar reconstruction and minimum intensity projections: comparison with MR cholangiography.	Ryoo I, Lee JM, Park HS, Han JK, Choi BI.	Eur J Radiol	66.4	999	27	2
21715139	Muscle weakness in septic patients requiring mechanical ventilation: protective effect of transcutaneous neuromuscular electrical stimulation.	Rodriguez PO, Setten M, Maskin LP, Bonelli I, Vidomlansky SR, Attie S, Frosiani SL, Kozima S, Valentini R.	J Crit Care	72	18	16	1
21717119	E-ercise intensity and o-ygen uptake kinetics in African-American and Caucasian women.	Lai N, Tolentino-Silva F, Nasca MM, Silva MA, Gladden LB, Cabrera ME.	Eur J Appl Physiol	22.9	999	13	10
21725826	Amelioration of oral mucositis pain by NASA near-infrared light-emitting diodes in bone marrow transplant patients.	Hodgson BD, Margolis DM, Salzman DE, Eastwood D, Tarima S, Williams LD, Sande JE, Vaughan WP, Whelan HT.	Support Care Cancer	37	999	80	3
21728445	The moderating role of executive functioning in older adults' responses to a reminder of mortality.	Maxfield M, Pyszczynski T, Greenberg J, Pepin R, Davis HP.	Psychol Aging	70.9	999	79	1
21733320	Effect of adiposity on vitamin D status and the 25-hydro-ycholecalciferol response to supplementation in healthy young and older Irish adults.	Forsythe LK, Livingstone MB, Barnes MS, Horigan G, McSorley EM, Bonham MP, Magee PJ, Hill TR, Lucey AJ, Cashman KD, Kiely M, Strain JJ, Wallace JM.	Br J Nutr	999	64	102	4
21733663	Concomitant blockade of 5-HT(1A) receptor and 5-HT transporter: use of the Hunter Serotonin to-icity criteria in a clinical pharmacology study.	Parks V, Philipp AW, Raje S, Plotka A, Schechter LE, Connell J, Chalon S.	Eur Neuropsychopharmacol	29	999	43	6
21734254	Effect of multimedia information sequencing on educational outcome in orthodontic training.	Aly M, Willems G, Van Den Noortgate W, Elen J.	Eur J Orthod	999	999	48	22
21737235	Efficacy and cardiovascular tolerability of continuous veno-venous hemodiafiltration in acute decompensated heart failure: a randomized comparative study.	Badawy SS, Fahmy A.	J Crit Care	63	18	40	9
21740624	Acceptance and commitment therapy as guided self-help for psychological distress and positive mental health: a randomized controlled trial.	Fledderus M, Bohlmeijer ET, Pieterse ME, Schreurs KM.	Psychol Med	42.5	18	376	5
21751879	Comparison of the efficacy of topical N-acetyl-cysteine and a topical steroid-antibiotic combination therapy in the treatment of meibomian gland dysfunction.	Akyol-Salman I, Azizi S, Mumcu UY, AteÅ? O, Baykal O.	J Ocul Pharmacol Ther	41.7	999	20	4
21753727	NG--4010, a capsaicin 8% dermal patch, administered alone or in combination with systemic neuropathic pain medications, reduces pain in patients with postherpetic neuralgia.	Irving G, Backonja M, Rauck R, Webster LR, Tobias JK, Vanhove GF.	Clin J Pain	71	18	1127	6
21760499	A randomized, placebo-controlled trial of acetaminophen e-tended release for treatment of post-marathon muscle soreness.	Prior MJ, Lavins BJ, Cooper K.	Clin J Pain	38.4	18	610	13
21760585	Effect of carotenoid supplementation on plasma carotenoids, inflammation and visual development in preterm infants.	Rubin LP, Chan GM, Barrett-Reis BM, Fulton AB, Hansen RM, Ashmeade TL, Oliver JS, Mackey AD, Dimmit RA, Hartmann EE, Adamkin DH.	J Perinatol	0	0	203	16
21762564	A randomized trial of conventional chest physical therapy versus high frequency chest wall compressions in intubated and non-intubated adults.	Clinkscale D, Spihlman K, Watts P, Rosenbluth D, Kollef MH.	Respir Care	50.3	18	180	10
21767441	A double-blind, randomized, placebo-controlled, active reference study of Lu AA21004 in patients with major depressive disorder.	Alvarez E, Perez V, Dragheim M, Loft H, Artigas F.	Int J Neuropsychopharmacol	43.3	18	426	5
21769664	Impact of clinical fractures on health-related quality of life is dependent on time of assessment since fracture: results from the FREEDOM trial.	Silverman S, Viswanathan HN, Yang YC, Wang A, Boonen S, Ragi-Eis S, Fardellone P, Gilchrist N, Lips P, Nevitt M, Palacios Gil-AntuÃ±ano S, Pavelka K, Revicki D, Simon J, Macarios D, Siris ES.	Osteoporos Int	72.3	60	7578	13
21770829	The efficacy of melatonin administration on oocyte quality.	BatÄ±oÄ?lu AS, Sahin U, Gurlek B, Ozturk N, Unsal E.	Gynecol Endocrinol	30.1	20	85	15
21774840	Enriched cereal bars are more effective in increasing plasma quercetin compared with quercetin from powder-filled hard capsules	Sarah Egert, Siegfried Wolffram, Beate Schulze, Peter Langguth, Eva Maria Hubbermann, Karin Schwarz, Berit Adolphi, Anja Bosy-Westphal, Gerald Rimbach and Manfred James Mu ̈ller	British Journal of Nutrition	25.7	999	6	4
21775915	Evaluation of early enteral feeding through nasogastric and nasojejunal tube in severe acute pancreatitis: a noninferiority randomized controlled trial.	Singh N, Sharma B, Sharma M, Sachdev V, Bhardwaj P, Mani K, Joshi YK, Saraya A.	Pancreas	39.4	999	78	11
21778912	Effects of resistance training and walking on cardiovascular disease risk in African-American women.	Hornbuckle LM, Liu PY, Ilich JZ, Kim JS, Arjmandi BH, Panton LB.	Med Sci Sports E-erc	49	999	44	9
21781149	Losartan and amlodipine on myocardial structure and function: a prospective, randomized, clinical trial.	Fogari R, Mugellini A, Destro M, Corradi L, Lazzari P, Zoppi A, Preti P, Derosa G.	Diabet Med	64	999	181	9
21782171	Informed consent in trauma: does written information improve patient recall of risks? A prospective randomised study.	Smith HK, Manjaly JG, Yousri T, Upadhyay N, Taylor H, Nicol SG, Livingstone JA.	Injury	62.1	18	100	19
21782418	Health-related quality of life (HRQoL) after multimodal treatment for primarily non-resectable rectal cancer. Long-term results from a phase III study.	BrÃ¦ndengen M, Tveit KM, Hjermstad MJ, Johansson H, Berglund Ã?, Brandberg Y, Glimelius B.	Eur J Cancer	65.5	999	76	2
21787035	Relapse dynamics during smoking cessation: recurrent abstinence violation effects and lapse-relapse progression.	Kirchner TR, Shiffman S, Wileyto EP.	J Abnorm Psychol	38.9	21	305	5
21791142	Marine n-3 fatty acids, atrial fibrillation and QT interval in haemodialysis patients.	Kirkegaard E, Svensson M, Strandhave C, Schmidt EB, JÃ¸rgensen KA, Christensen JH.	Br J Nutr	67	999	206	9
21791146	DNA methylation and cognitive functioning in healthy older adults.	Schiepers OJ, van Bo-tel MP, de Groot RH, Jolles J, Kok FJ, Verhoef P, Durga J.	Br J Nutr	60.9	50	215	5
21796409	Effects of strength, endurance and combined training on muscle strength, walking speed and dynamic balance in aging men.	Holviala J, Kraemer WJ, SillanpÃ¤Ã¤ E, Karppinen H, Avela J, Kauhanen A, HÃ¤kkinen A, HÃ¤kkinen K.	Eur J Appl Physiol	56.4	999	114	5
21797816	CB1 - cannabinoid receptor antagonist effects on cortisol in cannabis-dependent men.	Goodwin RS, Baumann MH, Gorelick DA, Schwilke E, Schwope DM, Darwin WD, Kelly DL, Schroeder JR, Ortemann-Renon C, Bonnet D, Huestis MA.	Am J Drug Alcohol Abuse	999	18	14	5
21801476	Effect of B-vitamins and n-3 PUFA supplementation for 5 years on blood pressure in patients with CVD.	Szabo de Edelenyi F, Vergnaud AC, Ahluwalia N, Julia C, Hercberg S, Blacher J, Galan P.	Br J Nutr	61.3	45	2501	9
21805085	Effects of micronised purified flavonoid fraction on pain, semen analysis and scrotal color Doppler parameters in patients with painful varicocele; results of a randomized placebo-controlled study.	Soylemez H, Kiliҫ S, Atar M, Penbegül N, Sancaktutar AA, Bozkurt Y.	Int Urol Nephrol	20.3	999	40	14
21810842	Is there a BP benefit of changing the time of aspirin administration in treated hypertensive patients?	Dimitrov Y, Baguet JP, Hottelart C, Marboeuf P, Tartiere JM, Ducher M, Fauvel JP.	Eur J Prev Cardiol	65	18	75	9
21812937	Transtheoretical model-based postpartum se-ual health education program improves women's se-ual behaviors and se-ual health.	Lee JT, Tsai JL.	J Se- Med	29.9	20	250	5
21817091	Striatum-medial prefrontal corte- connectivity predicts developmental changes in reinforcement learning.	van den Bos W, Cohen M-, Kahnt T, Crone EA.	Cereb Corte-	999	8	67	6
21818576	Effects of gabapentin on postoperative pain, nausea and vomiting after abdominal hysterectomy: a double blind randomized clinical trial.	Ajori L, Nazari L, Mazloomfard MM, Amiri Z.	Arch Gynecol Obstet	48.8	999	140	14
21819279	Prepotent response inhibition predicts treatment outcome in attention deficit/hyperactivity disorder.	van der Oord S, Geurts HM, Prins PJ, Emmelkamp PM, Oosterlaan J.	Child Neuropsychol	999	8	44	5
21820829	Dose modulated retrospective ECG-gated versus non-gated 64-row CT angiography of the aorta at the same radiation dose: comparison of motion artifacts, diagnostic confidence and signal-to-noise-ratios.	Schernthaner RE, Stadler A, Beitzke D, Homolka P, Weber M, Lammer J, Czerny M, Loewe C.	Eur J Radiol	68	999	60	9
21822764	Using the transporters DVD as a learning tool for children with Autism Spectrum Disorders (ASD).	Young RL, Posselt M.	J Autism Dev Disord	999	4	25	5
21823994	Responses to superficial heating and cooling differ in men and women with knee osteoarthritis.	Denegar CR, Schimizzi ME, Dougherty DR, Friedman JE, Clark JE, Comstock BA, Kraemer WJ.	Physiother Theory Pract	62	999	34	13
21826454	High-intensity sprint fatigue does not alter constant-subma-imal velocity running mechanics and spring-mass behavior.	Morin JB, Tomazin K, Samozino P, Edouard P, Millet GY.	Eur J Appl Physiol	25.6	999	11	22
21829006	Comparison between single-injection inferomedial and inferotemporal peribulbar blockades before cataract surgery.	Mahdy RA, Ghanem MT.	Ophthalmologica	67.6	999	200	7
21831487	Efficacy of liposome-encapsulated 0.5% ropivacaine in ma-illary dental anaesthesia.	Franz-Montan M, de Paula E, Groppo FC, Ranali J, Volpato MC.	Br J Oral Ma-illofac Surg	23	999	40	22
21833852	Comparison of ultrasonography and physical e-amination in the diagnosis of incisional hernia in a prospective study.	Bloemen A, van Dooren P, Huizinga BF, Hoofwijk AG.	Hernia	63.3	18	456	11
21835900	Efficacy of methylprednisolone in preventing lung injury following pulmonary thromboendarterectomy.	Kerr KM, Auger WR, Marsh JJ, Devendra G, Spragg RG, Kim NH, Channick RN, Jamieson SW, Madani MM, Manecke GR, Roth DM, Shragg GP, Fedullo PF.	Chest	22.5	18	98	10
21838764	A web-based pedometer programme in women with a recent history of gestational diabetes.	Kim C, Draska M, Hess ML, Wilson EJ, Richardson CR.	Diabet Med	35.7	18	49	4
21840117	Towards an optimal interval for prostate cancer screening.	van Leeuwen PJ, Roobol MJ, Kranse R, Zappa M, Carlsson S, Bul M, Zhu -, Bangma CH, Schroder FH, Hugosson J.	Eur Urol	999	55	37419	2
21840169	Use of portable digital media players increases patient motivation and practice in voice therapy.	van Leer E, Connor NP.	J Voice	59.5	999	12	5
21840651	Subjective and psychomotor effects of carisoprodol in combination with o-ycodone in healthy volunteers.	Zacny JP, Paice JA, Coalson DW.	Drug Alcohol Depend	27	21	15	5
21842236	Use of computed tomographic reconstruction to establish the ideal entry point for pedicle screws in idiopathic scoliosis.	Su P, Zhang W, Peng Y, Liang A, Du K, Huang D.	Eur Spine J	16.8	999	20	13
21842998	Numbers can be worth a thousand pictures: individual differences in understanding graphical and numerical representations of health-related information.	Gaissmaier W, Wegwarth O, Skopec D, Muller AS, Broschinski S, Politi MC.	Health Psychol	31	999	275	21
21846962	Early versus late pulmonary rehabilitation in chronic obstructive pulmonary disease patients with acute e-acerbations: a randomized trial.	Puhan MA, Spaar A, Frey M, Turk A, BrÃ¤ndli O, Ritscher D, Achermann E, Kaelin R, Karrer W.	Respiration	67	40	36	10
21847611	Effect of two Î²-alanine dosing protocols on muscle carnosine synthesis and washout.	Stellingwerff T, Anwander H, Egger A, Buehler T, Kreis R, Decombaz J, Boesch C.	Amino Acids	24.8	999	31	13
21851195	Effects of D-cycloserine on craving to alcohol cues in problem drinkers: preliminary findings.	Hofmann SG, Huweler R, MacKillop J, Kantak KM.	Am J Drug Alcohol Abuse	28.8	21	20	5
21852153	Circulating endothelial cells and stroke: influence of stroke subtypes and changes during the course of disease.	Woywodt A, Gerdes S, Ahl B, Erdbruegger U, Haubitz M, Weissenborn K.	J Stroke Cerebrovasc Dis	60.1	999	139	9
21853265	Gut microbiota of healthy elderly NSAID users is selectively modified with the administration of Lactobacillus acidophilus NCFM and lactitol.	Bjorklund M, Ouwehand AC, Forssten SD, NikkilÃ¤ J, Tiihonen K, Rautonen N, Lahtinen SJ.	Age (Dordr)	71	65	47	11
21858589	A randomized controlled trial of conventional fraction and late course accelerated hyperfraction three-dimensional conformal radiotherapy for esophageal cancer.	Wang JH, Lu -J, Zhou J, Wang F.	Cell Biochem Biophys	65	999	98	2
21858593	Suction drains, quilting sutures, and fibrin sealant in the prevention of seroma formation in abdominoplasty: which is the best strategy?	Bercial ME, Sabino Neto M, Calil JA, Rossetto LA, Ferreira LM.	Aesthetic Plast Surg	42.4	999	43	11
21858678	Randomized crossover study of latanoprost and travoprost in eyes with open-angle glaucoma.	Sawada A, Yamamoto T, Takatsuka N.	Graefes Arch Clin E-p Ophthalmol	53.2	999	42	7
21862415	A phase II study of eribulin mesylate (E7389) in patients with advanced, previously treated non-small-cell lung cancer.	Spira AI, Iannotti NO, Savin MA, Neubauer M, Gabrail NY, Yanagihara RH, Zang EA, Cole PE, Shuster D, Das A.	Clin Lung Cancer	65	18	103	2
21862447	Word intelligibility and age predict visual corte- activity during word listening.	Kuchinsky SE, Vaden KI Jr, Keren NI, Harris KC, Ahlstrom JB, Dubno JR, Eckert MA.	Cereb Corte-	50.5	999	36	8
21864479	Evaluation of a novel paediatric self-inflating bag to improve accuracy of tidal volumes delivered during simulated advanced paediatric resuscitation.	Park SO, Lee KR, Baek KJ, Shim HW, Hong DY.	Resuscitation	30.2	999	73	10
21870050	Is laparoscopic duodenojejunal bypass with sleeve an effective alternative to Rou- en Y gastric bypass in morbidly obese patients: preliminary results of a randomized trial.	Praveen Raj P, Kumaravel R, Chandramaliteeswaran C, Rajpandian S, Palanivelu C.	Obes Surg	41.5	18	57	4
21878489	Comparison of quantities: core and format-dependent regions as revealed by fMRI.	Chassy P, Grodd W.	Cereb Corte-	28.6	999	16	6
21880037	Short-term infusion of a fish oil-based lipid emulsion modulates fatty acid status, but not immune function or (anti)o-idant balance: a randomized cross-over study.	Versleijen MW, Roelofs HM, Rombouts C, Hermans PW, Noakes PS, Calder PC, Wanten GJ.	Eur J Clin Invest	39	999	8	1
21880336	Efficacy and safety of subcutaneous interferon Î²-1a in relapsing-remitting multiple sclerosis: further outcomes from the IMPROVE study.	De Stefano N, Sormani MP, Stubinski B, Blevins G, Drulovic JS, Issard D, Shotekov P, Gasperini C.	J Neurol Sci	999	999	180	13
21881869	Four-year results following treatment of intrabony periodontal defects with an enamel matri- derivative alone or combined with a biphasic calcium phosphate.	Pietruska M, Pietruski J, Nagy K, Brec- M, Arweiler NB, Sculean A.	Clin Oral Investig	999	999	24	22
21883997	Effects of beta-blockade on e-ercise performance at high altitude: a randomized, placebo-controlled trial comparing the efficacy of nebivolol versus carvedilol in healthy subjects.	Valentini M, Revera M, Bilo G, Caldara G, Savia G, Styczkiewicz K, Parati S, Gregorini F, Faini A, Branzi G, Malfatto G, MagrÃ¬ D, Agostoni P, Parati G.	Cardiovasc Ther	39.1	999	27	9
21885990	Short-term statin treatment does not prevent ischemia and reperfusion-induced endothelial dysfunction in humans.	Wouters CW, Wever KE, Bronckers I, Hopman MT, Smits P, Thijssen DH, Rongen GA.	J Cardiovasc Pharmacol	22.8	999	47	9
21887727	Effect of adalimumab on clinical laboratory parameters in patients with Crohn's disease: results from the CHARM trial.	Rubin DT, Mulani P, Chao J, Pollack PF, Bensimon AG, Yu AP, Ghosh S.	Inflamm Bowel Dis	999	18	778	11
21887807	The effect of herbal e-tract (EstroG-100) on pre-, peri- and post-menopausal women: a randomized double-blind, placebo-controlled study.	Chang A, Kwak BY, Yi K, Kim JS.	Phytother Res	53.7	999	64	4
21889304	Using short information leaflets as recruitment tools did not improve recruitment: a randomized controlled trial.	Brierley G, Richardson R, Torgerson DJ.	J Clin Epidemiol	43.5	999	123	21
21890323	Oral preoperative antio-idants in pancreatic surgery: a double-blind, randomized, clinical trial.	Braga M, Bissolati M, Rocchetti S, Beneduce A, Pecorelli N, Di Carlo V.	Nutrition	64.1	18	36	11
21895392	At the same time or apart in time? The role of presentation timing and retrieval dynamics in generalization.	Vlach HA, Ankowski AA, Sandhofer CM.	J E-p Psychol Learn Mem Cogn	2.2	2	144	5
21895543	Cyclophosphamide, do-orubicin, vincristine, prednisone and ritu-imab versus epirubicin, cyclophosphamide, vinblastine, prednisone and ritu-imab for the initial treatment of elderly fit" patients with diffuse large B-cell lymphoma: results from the ANZINTER3 trial of the Intergruppo Italiano Linfomi..."	Merli F, Luminari S, Rossi G, Mammi C, Marcheselli L, Tucci A, Ilariucci F, Chiappella A, Musso M, Di Rocco A, Stelitano C, Alvarez I, Baldini L, Mazza P, Salvi F, Arcari A, Fragasso A, Gobbi PG, Liberati AM, Federico M.	Leuk Lymphoma	72	65	224	2
21895621	Lactobacillus salivarius plus fructo-oligosaccharide is superior to fructo-oligosaccharide alone for treating children with moderate to severe atopic dermatitis: a double-blind, randomized, clinical trial of efficacy and safety.	Wu KG, Li TH, Peng HJ.	Br J Dermatol	7.4	2	54	12
21896676	A physiotherapy service to an emergency e-tended care unit does not decrease admission rates to hospital: a randomised trial.	Jesudason C, Stiller K, McInnes M, Sullivan T.	Emerg Med J	70.1	18	187	19
21898107	Serum selenium concentration in liver cirrhotic patients suffering from hepatitis B and C in Pakistan.	Rauf N, Tahir SS, Dilawar S, Ahmad I, Parvez S.	Biol Trace Elem Res	999	18	150	1
21899919	Eyelash growth in subjects treated with bimatoprost: a multicenter, randomized, double-masked, vehicle-controlled, parallel-group study.	Smith S, Fagien S, Whitcup SM, Ledon F, Somogyi C, Weng E, Beddingfield FC 3rd.	J Am Acad Dermatol	49.8	18	278	12
21900886	Pharmacogenetics of naltre-one in asian americans: a randomized placebo-controlled laboratory study.	Ray LA, Bujarski S, Chin PF, Miotto K.	Neuropsychopharmacology	22.3	999	35	5
21904945	Randomized controlled trial of health maintenance reminders provided directly to patients through an electronic PHR.	Wright A, Poon EG, Wald J, Feblowitz J, Pang JE, Schnipper JL, Grant RW, Gandhi TK, Volk LA, Bloom A, Williams DH, Gardner K, Epstein M, Nelson L, Businger A, Li Q, Bates DW, Middleton B.	J Gen Intern Med	49	999	3979	21
21908049	Regulatory competence and social communication in term and preterm infants at 12 months corrected age. Results from a randomized controlled trial.	Olafsen KS, RÃ¸nning JA, HandegÃ¥rd BH, Ulvund SE, Dahl LB, Kaaresen PI.	Infant Behav Dev	0.6	999	214	16
21908494	Combined prolonged e-posure therapy and paro-etine for PTSD related to the World Trade Center attack: a randomized controlled trial.	Schneier FR, Neria Y, Pavlicova M, Hembree E, Suh EJ, Amsel L, Marshall RD.	Am J Psychiatry	50.3	18	37	5
21909698	Randomised multicentre trial of circular stapling devices.	Folkesson J, Brown SS, Gunnarsson U, PÃ¥hlman L.	Int J Colorectal Dis	67.7	18	529	2
21911336	Effect of physical activity counseling on physical activity of older people in Finland (ISRCTN 07330512).	Rasinaho M, Hirvensalo M, TormÃ¤kangas T, Leinonen R, Lintunen T, Rantanen T.	Health Promot Int	77.6	75	632	5
21916989	Ten-day sequential therapy is more effective than proton pump inhibitor-based therapy in Korea: a prospective, randomized study.	Oh HS, Lee DH, Seo JY, Cho YR, Kim N, Jeoung SH, Kim JW, Hwang JH, Park YS, Lee SH, Shin CM, Cho HJ, Jung HC, Song IS.	J Gastroenterol Hepatol	57.5	18	246	1
21922202	Prophylactic treatment of local reactions to i.v. vinorelbine: a randomized study.	Quant E, Bergman B.	Support Care Cancer	68	18	79	2
21925260	Single-trial conditioning in a human taste-endoto-in paradigm induces conditioned odor aversion but not cytokine responses.	Grigoleit JS, Kullmann JS, Winkelhaus A, Engler H, Wegner A, Hammes F, Oberbeck R, Schedlowski M.	Brain Behav Immun	26.6	999	20	5
21925682	Efficacy and tolerability of the novel triple reuptake inhibitor amitifadine in the treatment of patients with major depressive disorder: a randomized, double-blind, placebo-controlled trial.	Tran P, Skolnick P, Czobor P, Huang NY, Bradshaw M, McKinney A, Fava M.	J Psychiatr Res	48.8	18	61	5
21925716	Effect on perfusion chamber thrombus size in patients with atrial fibrillation during anticoagulant treatment with oral direct thrombin inhibitors, AZD0837 or -imelagatran, or with vitamin K antagonists.	Wolzt M, Eriksson UG, Gouya G, Leuchten N, Kapiotis S, Elg M, Schutzer KM, Zetterstrand S, Holmberg M, WÃ¥hlander K.	Thromb Res	67	999	85	9
21925957	Predicting biochemical tumor control after brachytherapy for clinically localized prostate cancer: The Memorial Sloan-Kettering Cancer Center e-perience.	Zelefsky MJ, Chou JF, Pei -, Yamada Y, Kollmeier M, Co- B, Zhang Z, Schechter M, Cohen GN, Zaider M.	Brachytherapy	999	999	1466	2
21926583	Comparison of Oligon catheters and chlorhe-idine-impregnated sponges with standard multilumen central venous catheters for prevention of associated colonization and infections in intensive care unit patients: a multicenter, randomized, controlled study.	Arvaniti K, Lathyris D, Clouva-Molyvdas P, Haidich AB, Mouloudi E, Synnefaki E, Koulourida V, Georgopoulos D, Gerogianni N, Nakos G, Matamis D; Catheter-Related Infections in ICU (CRI-ICU) Group.	Crit Care Med	59	18	465	1
21926601	Corticosteroid after etomidate in critically ill patients: a randomized controlled trial.	Payen JF, Dupuis C, Trouve-Buisson T, Vinclair M, Brou- C, Bouzat P, Genty C, Monneret D, Faure P, Chabre O, Bosson JL.	Crit Care Med	48.5	999	97	22
21926614	Delayed enteral feeding impairs intestinal carbohydrate absorption in critically ill patients.	Nguyen NQ, Besanko LK, Burgstad C, Bellon M, Holloway RH, Chapman M, Horowitz M, Fraser RJ.	Crit Care Med	55.5	999	28	22
21927836	The effect of different dosing regimens of levodopa/carbidopa/entacapone on plasma levodopa concentrations.	Ingman K, Naukkarinen T, Vahteristo M, Korpela I, KuoppamÃ¤ki M, Ellmen J.	Eur J Clin Pharmacol	27.2	18	20	6
21928096	Prophylactic antibiotic use in elective inguinal hernioplasty in a trauma center.	Ergul Z, Akinci M, Ugurlu C, Kulacoglu H, Yilmaz KB.	Hernia	49	18	200	11
21928106	Astragalus polysaccharide injection integrated with vinorelbine and cisplatin for patients with advanced non-small cell lung cancer: effects on quality of life and survival.	Guo L, Bai SP, Zhao L, Wang -H.	Med Oncol	62	18	136	2
21932036	Comparison of ma-imal and more ma-imal intermittent androgen blockade during 5-year treatment of advanced prostate cancer T3N-M--1.	Dutkiewicz SA.	Int Urol Nephrol	73	999	63	2
21933833	Reduction of age-associated arterial wall changes by low-dose valsartan.	Lunder M, Janic M, Sabovic M.	Eur J Prev Cardiol	42.9	30	40	9
21933851	The role of matched sibling donor allogeneic stem cell transplantation in pediatric high-risk acute myeloid leukemia: results from the AML-BFM 98 study.	Klusmann JH, Reinhardt D, Zimmermann M, Kremens B, Vormoor J, Dworzak M, Creutzig U, Klingebiel T.	Haematologica	999	0	274	3
21933939	Final kissing ballooning and long-term clinical outcomes in coronary bifurcation lesions treated with 1-stent technique: results from the COBIS registry.	Gwon HC, Hahn JY, Koo BK, Song YB, Choi SH, Choi JH, Lee SH, Jeong MH, Kim HS, Seong IW, Yang JY, Rha SW, Jang Y, Yoon JH, Tahk SJ, Seung KB, Park SJ.	Heart	62.2	999	1005	9
21937526	The efficacy of forward head correction on nerve root function and pain in cervical spondylotic radiculopathy: a randomized trial.	Diab AA, Moustafa IM.	Clin Rehabil	46.1	999	96	6
21937705	A multicenter randomized phase III trial of vinorelbine/gemcitabine doublet versus capecitabine monotherapy in anthracycline- and ta-ane-pretreated women with metastatic breast cancer.	Pallis AG, Boukovinas I, Ardavanis A, Varthalitis I, Malamos N, Georgoulias V, Mavroudis D.	Ann Oncol	60	18	148	2
21940133	The utility of the HeartSaver Sticker for maintaining correct hand position during chest compressions.	You JS, Chung SP, Park JY, Park S, Chung TN, Park I, Kim JH, Park JW, Hwang TS.	J Emerg Med	23.5	999	51	9
21940716	E-posure-clinical response analysis of paricalcitol in patients with chronic kidney disease (stage 5) on hemodialysis or peritoneal dialysis.	Noertersheuser PA, Pradhan RS, Klein CE, Williams LA, Palaparthy R, Garimella TS, Lichtenberger O, Awni WM.	J Clin Pharmacol	57	999	679	14
21942926	A comparison of the hypoalgesic effects of transcutaneous electrical nerve stimulation (TENS) and non-invasive interactive neurostimulation (Inter-(Â®)) on e-perimentally induced blunt pressure pain using healthy human volunteers.	Biggs N, Walsh DM, Johnson MI.	Neuromodulation	20.7	18	20	6
21943810	Randomized trial of a reentry modified therapeutic community for offenders with co-occurring disorders: crime outcomes.	Sacks S, Chaple M, Sacks JY, McKendrick K, Cleland CM.	J Subst Abuse Treat	38.2	999	127	5
21945867	Acquired differences in brain responses among monozygotic twins discordant for restrained eating.	Schur EA, Kleinhans NM, Goldberg J, Buchwald DS, Polivy J, Del Parigi A, Maravilla KR.	Physiol Behav	30.6	18	20	6
21947409	Effect of carrying a weighted backpack on lung mechanics during treadmill walking in healthy men	Paolo B. Dominelli • A. William Sheel • Glen E. Foster	Eur J Appl Physiol	28	999	7	10
21949432	Pulsatile lavage for the enhancement of pressure ulcer healing: a randomized controlled trial.	Ho CH, Bensitel T, Wang -, Bogie KM.	Phys Ther	56	18	28	6
21951314	Effect of mucosal TRPV1 inhibition in allergic rhinitis.	Alenmyr L, Greiff L, Andersson M, Sterner O, Zygmunt PM, HogestÃ¤tt ED.	Basic Clin Pharmacol To-icol	25	999	26	10
21954131	Long-term outcomes and costs of an integrated rehabilitation program for chronic knee pain: a pragmatic, cluster randomized, controlled trial.	Hurley MV, Walsh NE, Mitchell H, Nicholas J, Patel A.	Arthritis Care Res (Hoboken)	67	50	418	13
21954995	Body weight supported treadmill training versus traditional training in patients dependent on walking assistance after stroke: a randomized controlled trial.	HÃ¸yer E, Jahnsen R, Stanghelle JK, Strand LI.	Disabil Rehabil	52.2	999	60	6
21958025	A comparison of fentanyl with tramadol during propofol-based deep sedation for pediatric upper endoscopy.	Bedirli N, Egritas O, Cosarcan K, Bozkirli F.	Paediatr Anaesth	999	1	80	11
21959687	Evaluation of magnetic scope navigation in screening endoscopic e-amination of colorectal cancer.	Szura M, Bucki K, Matyja A, Kulig J.	Surg Endosc	54.8	40	200	2
21960048	Balneotherapy for chronic low back pain: a randomized, controlled study.	Kesiktas N, Karakas S, Gun K, Gun N, Murat S, Uludag M.	Rheumatol Int	61	45	60	18
21960086	Caffeine's effect on intermittent sprint cycling performance with different rest intervals.	Lee CL, Cheng CF, Lin JC, Huang HW.	Eur J Appl Physiol	18.7	999	14	4
21960371	Stenting or not prior to e-tracorporeal shockwave lithotripsy for ureteral stones? Results of a prospective randomized study.	Sfoungaristos S, Polimeros N, Kavouras A, Perimenis P.	Int Urol Nephrol	41.4	999	156	14
21962976	Bifrontal and bioccipital transcranial direct current stimulation (tDCS) does not induce mood changes in healthy volunteers: a placebo controlled study.	Plazier M, Joos K, Vanneste S, Ost J, De Ridder D.	Brain Stimul	21.5	21	17	6
21962978	Transcranial direct current stimulation in treatment resistant depression: a randomized double-blind, placebo-controlled study.	Palm U, Schiller C, Fintescu Z, Obermeier M, Keeser D, Reisinger E, Pogarell O, Nitsche MA, Moller HJ, Padberg F.	Brain Stimul	57	999	22	5
21965126	Effects of patient education and progressive muscle rela-ation alone or combined on adherence to continuous positive airway pressure treatment in obstructive sleep apnea patients.	Wang W, He G, Wang M, Liu L, Tang H.	Sleep Breath	999	30	152	6
21968714	The effectiveness of patient control analgesia in the treatment of acute traumatic pain in the emergency department: a randomized controlled trial.	Rahman NH, DeSilva T.	Eur J Emerg Med	37	18	47	22
21971437	Tramadol and 0.5% levobupivacaine for single-shot interscalene block: effects on postoperative analgesia in patients undergoing shoulder arthroplasty.	Alemanno F, Ghisi D, Fanelli A, Faliva A, Pergolotti B, Bizzarri F, Fanelli G.	Minerva Anestesiol	55.7	18	120	13
21975593	Effect of a dissonance-based prevention program on risk for eating disorder onset in the conte-t of eating disorder risk factors.	Stice E, Rohde P, Gau J, Shaw H.	Prev Sci	17.1	14	410	5
21979272	Effectiveness of a targeted e-ercise intervention in reversing older people's mild balance dysfunction: a randomized controlled trial.	Yang -J, Hill K, Moore K, Williams S, Dowson L, Borschmann K, Simpson JA, Dharmage SC.	Phys Ther	80.5	65	165	5
21979801	Improvement in lung diffusion by endothelin A receptor blockade at high altitude.	de Bisschop C, Martinot JB, Leurquin-Sterk G, Faoro V, Guenard H, Naeije R.	J Appl Physiol	35	999	22	10
21982583	Salivary cortisol profiles in patients remitted from recurrent depression: one-year follow-up of a mindfulness-based cognitive therapy trial.	Ge--Fabry M, Jermann F, Kosel M, Rossier MF, Van der Linden M, Bertschy G, Bondolfi G, Aubry JM.	J Psychiatr Res	47.5	999	60	5
21983476	Initial RCT of a distress tolerance treatment for individuals with substance use disorders.	Bornovalova MA, Gratz KL, Daughters SB, Hunt ED, Lejuez CW.	Drug Alcohol Depend	43.2	18	76	5
21983758	Effect of etomidate versus thiopental on major depressive disorder in electroconvulsive therapy, a randomized double-blind controlled clinical trial.	Abdollahi MH, Izadi A, Hajiesmaeili MR, Ghanizadeh A, Dastjerdi G, Hosseini HA, Ghiamat MM, Abbasi HR.	J ECT	33.1	999	60	5
21983797	Time course responses of serum GH, insulin, IGF-1, IGFBP1, and IGFBP3 concentrations after heavy resistance e-ercise in trained and untrained men.	Hasani-Ranjbar S, Soleymani Far E, Heshmat R, Rajabi H, Kosari H.	Endocrine	22.7	20	34	4
21983842	Comparison of non-mesh (Desarda) and mesh (Lichtenstein) methods for inguinal hernia repair among black African patients: a short-term double-blind RCT.	Manyilirah W, Kijjambu S, Upoki A, Kiryabwire J.	Hernia	32	18	101	13
21986184	Voluntary drinking behaviour, fluid balance and psychological affect when ingesting water or a carbohydrate-electrolyte solution during e-ercise.	Peacock OJ, Thompson D, Stokes KA.	Appetite	26	999	12	22
21986189	The effect of high lactose-isomaltulose on cognitive performance of young children. A double blind cross-over design study.	Taib MN, Shariff ZM, Wesnes KA, Saad HA, Sariman S.	Appetite	5.6	5	30	4
21986341	CORDIAL: cognitive rehabilitation and cognitive-behavioral treatment for early dementia in Alzheimer disease: a multicenter, randomized, controlled trial.	Kurz A, Thone-Otto A, Cramer B, Egert S, Frolich L, Gertz HJ, Kehl V, Wagenpfeil S, Werheid K.	Alzheimer Dis Assoc Disord	73.7	999	201	6
21986390	Minority participation in a school-based randomized clinical trial of tooth decay prevention in the United States.	Nelson S, Milgrom P.	Contemp Clin Trials	999	999	562	22
21987240	Oral bioavailability of mo-iflo-acin after Rou--en-Y gastric bypass surgery.	De Smet J, Colin P, De Paepe P, Ruige J, Batens H, Van Nieuwenhove Y, Vogelaers D, Blot S, Van Boc-laer J, Van Bortel LM, Boussery K.	J Antimicrob Chemother	999	999	12	11
21987279	A randomised controlled trial of absorbable versus non-absorbable sutures for skin closure after open carpal tunnel release.	Theopold C, Potter S, Dempsey M, O'Shaughnessy M.	J Hand Surg Eur Vol	55.4	999	38	6
21988334	Effects of CYP3A4 inhibition and induction on the pharmacokinetics and pharmacodynamics of tolvaptan, a non-peptide AVP antagonist in healthy subjects.	Shoaf SE, Bricmont P, Mallikaarjun S.	Br J Clin Pharmacol	28.6	18	39	22
21990263	Ischaemia-reperfusion injury impairs tissue plasminogen activator release in man.	Pedersen CM, Barnes G, Schmidt MR, BÃ¸tker HE, Kharbanda RK, Newby DE, Cruden NL.	Eur Heart J	23	999	22	9
21990343	Impact of a randomized control group on perceived effectiveness of a Disease Management Programme for diabetes type 2.	Flamm M, Panisch S, Winkler H, Sonnichsen AC.	Eur J Public Health	65.5	999	1489	4
21992849	Effect of low-dose human atrial natriuretic peptide on postoperative atrial fibrillation in patients undergoing pulmonary resection for lung cancer: a double-blind, placebo-controlled study.	Nojiri T, Yamamoto K, Maeda H, Takeuchi Y, Funakoshi Y, Inoue M, Okumura M.	J Thorac Cardiovasc Surg	71.5	999	40	10
21993383	Pioglitazone improves the cardiovascular profile in patients with uncomplicated systemic lupus erythematosus: a double-blind randomized clinical trial.	JuÃ¡rez-Rojas JG, Medina-Urrutia A-, Jorge-Galarza E, Caracas-Portilla NA, Posadas-SÃ¡nchez R, Cardoso-SaldaÃ±a GC, Goycochea-Robles MV, Silveira LH, Lino-Perez L, Mas-Oliva J, Perez-Mendez O, Posadas-Romero C.	Lupus	30	18	30	3
21993890	Effect of high and low sodium intake on urinary aquaporin-2 e-cretion in healthy humans.	Graffe CC, Bech JN, Pedersen EB.	Am J Physiol Renal Physiol	26	18	21	14
21996058	Effects of e-ercise on bone density and falls risk factors in post-menopausal women with osteopenia: a randomised controlled trial.	Bolton KL, Egerton T, Wark J, Wee E, Matthews B, Kelly A, Craven R, Kantor S, Bennell KL.	J Sci Med Sport	58.3	50	39	13
21997197	Comparison of intravitreal bevacizumab alone or combined with triamcinolone versus triamcinolone in diabetic macular edema: a randomized clinical trial.	Lim JW, Lee HK, Shin MC.	Ophthalmologica	59.9	999	105	7
21997547	Higher adenoma detection rates with cap-assisted colonoscopy: a randomised controlled trial.	Rastogi A, Bansal A, Rao DS, Gupta N, Wani SB, Shipe T, Gaddam S, Singh V, Sharma P.	Gut	61	999	420	2
21997802	Effect of pharmacological enhancement on the cognitive and clinical psychomotor performance of sleep-deprived doctors: a randomized controlled trial.	Sugden C, Housden CR, Aggarwal R, Sahakian BJ, Darzi A.	Ann Surg	28.4	999	39	5
22000773	Evaluation of intracoronary adenosine to prevent periprocedural myonecrosis in elective percutaneous coronary intervention (from the PREVENT-ICARUS Trial).	De Luca G, Iorio S, Venegoni L, Marino P.	Am J Cardiol	68.5	999	260	9
22000821	Mobile telephone short message service reminders can reduce nonattendance in physical therapy outpatient clinics: a randomized controlled trial.	Taylor NF, Bottrell J, Lawler K, Benjamin D.	Arch Phys Med Rehabil	37.2	999	679	21
22001561	Non-nutritive sucking and facilitated tucking relieve preterm infant pain during heel-stick procedures: a prospective, randomised controlled crossover trial.	Liaw JJ, Yang L, Katherine Wang KW, Chen CM, Chang YC, Yin T.	Int J Nurs Stud	0	0	34	15
22003058	Altered coronary vascular control during cold stress in healthy older adults.	Gao Z, Wilson TE, Drew RC, Ettinger J, Monahan KD.	Am J Physiol Heart Circ Physiol	45	18	21	9
22003819	A randomized controlled study to analyze the safety and efficacy of percutaneous nephrolithotripsy and retrograde intrarenal surgery in the management of renal stones more than 2 cm in diameter.	Bryniarski P, Paradysz A, Zyczkowski M, Kupilas A, Nowakowski K, Bogacki R.	J Endourol	52.6	999	64	14
22004512	Effects of variations in duodenal glucose load on glycaemic, insulin, and incretin responses in type 2 diabetes.	Ma J, Pilichiewicz AN, Feinle-Bisset C, Wishart JM, Jones KL, Horowitz M, Rayner CK.	Diabet Med	57	999	8	4
22004689	Twelve months of nightly zolpidem does not lead to rebound insomnia or withdrawal symptoms: a prospective placebo-controlled study.	Roehrs TA, Randall S, Harris E, Maan R, Roth T.	J Psychopharmacol	51.8	21	33	5
22005962	A new technique of arthroscopic fi-ation using double anchors for SLAP lesions.	Ok JH, Kim YS, Kim JM, Yoon KS.	Knee Surg Sports Traumatol Arthrosc	43.4	999	28	13
22008208	Effects of o-ygen on e-ertional dyspnoea and e-ercise performance in patients with chronic obstructive pulmonary disease.	Miki K, Maekura R, Hiraga T, Kitada S, Miki M, Yoshimura K, Tateishi Y.	Respirology	70.4	999	35	10
22008248	Randomized controlled trial of an internet-based intervention using random-digit-dial recruitment: the Disaster Recovery Web project.	Ruggiero KJ, Resnick HS, Paul LA, Gros K, McCauley JL, Acierno R, Morgan M, Galea S.	Contemp Clin Trials	999	18	1249	5
22008735	Combining escitalopram with gabo-adol provides no additional benefit in the treatment of patients with severe major depressive disorder.	Kasper S, Ebert B, Larsen K, Tonnoir B.	Int J Neuropsychopharmacol	42.1	18	490	5
22014309	Randomized controlled trial of mailed personalized feedback for problem drinkers in the emergency department: the short-term impact.	Havard A, Shakeshaft AP, Conigrave KM, Doran CM.	Alcohol Clin E-p Res	29	14	304	5
22015542	Budesonide/formoterol maintenance and reliever therapy in primary care asthma management: effects on bronchial hyperresponsiveness and asthma control.	Riemersma RA, Postma D, van der Molen T.	Prim Care Respir J	42.8	18	102	10
22016505	Galectin-3 in ambulatory patients with heart failure: results from the HF-ACTION study.	Felker GM, Fiuzat M, Shaw LK, Clare R, Whellan DJ, Bettari L, Shirolkar SC, Donahue M, Kitzman DW, Zannad F, PiÃ±a IL, O'Connor CM.	Circ Heart Fail	59	999	895	9
22017815	Breakfast glycaemic inde- and cognitive function in adolescent school children.	Cooper SB, Bandelow S, Nute ML, Morris JG, Nevill ME.	Br J Nutr	12.8	12	41	4
22018394	Antenatal training to improve breast feeding: a randomised trial.	Kronborg H, Maimburg RD, VÃ¦th M.	Midwifery	29	18	1193	15
22018935	A diet, physical activity, and stress reduction intervention in men with rising prostate-specific antigen after treatment for prostate cancer.	Hebert JR, Hurley TG, Harmon BE, Heiney S, Hebert CJ, Steck SE.	Cancer Epidemiol	69.9	999	47	2
22020318	A randomized phase II study of two doses of vorinostat in combination with 5-FU/LV in patients with refractory colorectal cancer.	Fakih MG, Groman A, McMahon J, Wilding G, Muindi JR.	Cancer Chemother Pharmacol	60	18	58	2
22024905	Supervised e-ercise with and without spinal manipulation performs similarly and better than home e-ercise for chronic neck pain: a randomized controlled trial.	Evans R, Bronfort G, Schulz C, Maiers M, Bracha Y, Svendsen K, Grimm R, Garvey T, Transfeldt E.	Spine (Phila Pa 1976)	46.3	18	270	6
22027496	Cardiovascular fitness modulates brain activation associated with spatial learning.	Holzschneider K, Wolbers T, Roder B, Hotting K.	Neuroimage	48.9	40	33	5
22028733	A chinese herbal formula to improve general psychological status in posttraumatic stress disorder: a randomized placebo-controlled trial on sichuan earthquake survivors.	Meng -Z, Wu F, Wei PK, -iu LJ, Shi J, Pang B, Sun DZ, Qin ZF, Huang Y, Lao L.	Evid Based Complement Alternat Med	51.1	16	245	5
22031515	Outcome of Graves' orbitopathy after total thyroid ablation and glucocorticoid treatment: follow-up of a randomized clinical trial.	Leo M, Marcocci C, Pinchera A, Nardi M, Megna L, Rocchi R, Latrofa F, Altea MA, Mazzi B, Sisti E, Profilo MA, MarinÃ² M.	J Clin Endocrinol Metab	46.1	999	52	4
22031621	Food increased the bioavailability of BMS-690514, an orally active EGFR/HER2/VEGF receptor kinase inhibitor, in healthy subjects.	Vakkalagadda B, Park JS, Ahlers CM, Dorizio S, Has T, Roongta V, Heller KN, Derbin GM, Zhang S.	J Clin Pharmacol	36.5	18	98	22
22033811	Return to work after early part-time sick leave due to musculoskeletal disorders: a randomized controlled trial.	Viikari-Juntura E, Kausto J, Shiri R, Kaila-Kangas L, Takala EP, Karppinen J, Miranda H, Luukkonen R, Martimo KP.	Scand J Work Environ Health	44.3	18	62	13
22035883	Comparison of double- and single-dose methotre-ate protocols for treatment of ectopic pregnancy.	Hamed HO, Ahmed SR, Alghasham AA.	Int J Gynaecol Obstet	24.2	999	157	15
22036632	Immediate changes in intraocular pressure after laser peripheral iridotomy in primary angle-closure suspects.	Jiang Y, Chang DS, Foster PJ, He M, Huang S, Aung T, Friedman DS.	Ophthalmology	59.5	50	734	7
22036910	Teriparatide and the risk of nonvertebral fractures in women with postmenopausal osteoporosis.	Krege JH, Wan -.	Bone	999	999	1085	13
22037965	Cancer distress reduction with a couple-based skills training: a randomized controlled trial.	Heinrichs N, Zimmermann T, Huber B, Herschbach P, Russell DW, Baucom DH.	Ann Behav Med	52.4	999	144	2
22038192	Determining the effectiveness of various treatment modalities in carpal tunnel syndrome by ultrasonography and comparing ultrasonographic findings with other outcomes.	Soyupek F, Yesildag A, Kutluhan S, Askin A, Ozden A, Uslusoy GA, Demirci S.	Rheumatol Int	50.7	999	47	6
22038532	Randomized clinical trial of a brief psychological intervention to increase walking in patients with intermittent claudication.	Cunningham MA, Swanson V, O'Carroll RE, Holdsworth RJ.	Br J Surg	65.3	999	58	9
22040521	Effects of ketoconazole and valproic acid on the pharmacokinetics of the ne-t generation NNRTI, lersivirine (UK-453,061), in healthy adult subjects.	Langdon G, Davis J, Layton G, Chong CL, Weissgerber G, Vourvahis M.	Br J Clin Pharmacol	28	18	28	1
22041253	Field effect of two commercial preparations of botulinum to-in type A: a prospective, double-blind, randomized clinical trial.	He-sel D, Brum C, do Prado DZ, Soirefmann M, Rotta FT, Dal'Forno T, Rodrigues TC.	J Am Acad Dermatol	43	999	58	12
22041970	Safety and efficacy of oral rehydration therapy until 2 h before surgery: a multicenter randomized controlled trial.	Itou K, Fukuyama T, Sasabuchi Y, Yasuda H, Suzuki N, Hinenoya H, Kim C, Sanui M, Taniguchi H, Miyao H, Seo N, Takeuchi M, Iwao Y, Sakamoto A, Fujita Y, Suzuki T.	J Anesth	48.3	20	274	22
22042588	Benefit of transparent soft-short-hood on the scope" for colonoscopy among e-perienced gastroenterologists and gastroenterologist trainee: a randomized controlled trial."	Prachayakul V, Aswakul P, Limsrivilai J, Anuchapreeda S, Bhanthumkomol P, Sripongpun P, Prangboonyarat T, Kachintorn U.	Surg Endosc	55.2	18	112	11
22042589	Endoscopic full-thickness plication versus laparoscopic fundoplication: a prospective study on quality of life and symptom control.	Antoniou SA, Koch OO, Kaindlstorfer A, Asche KU, Berger J, Granderath FA, Pointner R.	Surg Endosc	46.4	18	56	11
22045128	Assessment of neuromuscular block at the orbicularis oris, corrugator supercilii, and adductor pollicis muscles.	Saitoh Y, Sashiyama H, Oshima T, Nakata Y, Sato J.	J Anesth	66.7	999	54	22
22048237	Phase II, open-label, randomized trial of the MEK1/2 inhibitor selumetinib as monotherapy versus temozolomide in patients with advanced melanoma.	Kirkwood JM, Bastholt L, Robert C, Sosman J, Larkin J, Hersey P, Middleton M, Cantarini M, Zazulina V, Kemsley K, Dummer R.	Clin Cancer Res	57.1	18	200	2
22051148	GPR40-induced insulin secretion by the novel agonist TAK-875: first clinical findings in patients with type 2 diabetes.	Araki T, Hirayama M, Hiroi S, Kaku K.	Diabetes Obes Metab	52.6	20	65	4
22051419	Levosimendan versus an intra-aortic balloon pump in high-risk cardiac patients.	Lomivorotov VV, Boboshko VA, Efremov SM, Kornilov IA, Chernyavskiy AM, Lomivorotov VN, Knazkova LG, Karaskov AM.	J Cardiothorac Vasc Anesth	57.3	999	90	9
22054915	The effectiveness of a computer-tailored smoking cessation intervention for participants in lung cancer screening: a randomised controlled trial.	van der Aalst CM, de Koning HJ, van den Bergh KA, Willemsen MC, van Klaveren RJ.	Lung Cancer	57	50	1283	2
22055339	Napro-en or estradiol for bleeding and spotting with the levonorgestrel intrauterine system: a randomized controlled trial.	Madden T, Proehl S, Allsworth JE, Secura GM, Peipert JF.	Am J Obstet Gynecol	999	999	129	14
22056537	Effects of strength training versus power training on physical performance in prefrail community-dwelling older adults.	Drey M, Zech A, Freiberger E, Bertsch T, Uter W, Sieber CC, Pfeifer K, Bauer JM.	Gerontology	77	65	69	5
22057579	Immunomodulatory effect of NSAID in geriatric patients with acute infection: effects of piro-icam on chemokine/cytokine secretion patterns and levels of heat shock proteins. A double-blind randomized controlled trial. (ISRCTN58517443).	Beyer I, Njemini R, Bautmans I, Demanet C, Mets T.	Cell Stress Chaperones	84.5	70	30	1
22057753	Comparison of Limberg flap and tension-free primary closure during pilonidal sinus surgery.	OkuÅ? A, Sevinc B, Karahan O, Eryilmaz MA.	World J Surg	25	999	93	1
22057836	Effect of individualized worksite e-ercise training on aerobic capacity and muscle strength among construction workers--a randomized controlled intervention study.	Gram B, Holtermann A, SÃ¸gaard K, SjÃ¸gaard G.	Scand J Work Environ Health	43.7	999	67	5
22058145	Risk modification of colorectal adenoma by CYP7A1 polymorphisms and the role of bile acid metabolism in carcinogenesis.	Wertheim BC, Smith JW, Fang C, Alberts DS, Lance P, Thompson PA.	Cancer Prev Res (Phila)	66.4	999	703	2
22059933	A preliminary randomized controlled study to determine the application frequency of a new lymphoedema bandaging system.	Moffatt CJ, Franks PJ, Hardy D, Lewis M, Parker V, Feldman JL.	Br J Dermatol	60.3	18	76	12
22061077	Randomised clinical trial: the efficacy of prucalopride in patients with chronic intestinal pseudo-obstruction - a double-blind, placebo-controlled, cross-over, multiple n = 1 study	A V Emmanuel,* M A Kamm,† A J Roy,* R Kerstens,‡ and L Vandeplassche‡	Aliment Pharmacol Ther	39	999	7	11
22061340	Transitions in first-year college student drinking behaviors: does pre-college drinking moderate the effects of parent- and peer-based intervention components?	Cleveland MJ, Lanza ST, Ray AE, Turrisi R, Mallett KA.	Psychol Addict Behav	18	999	1121	5
22062358	Adalimumab induces and maintains clinical remission in patients with moderate-to-severe ulcerative colitis.	Sandborn WJ, van Assche G, Reinisch W, Colombel JF, D'Haens G, Wolf DC, Kron M, Tighe MB, Lazar A, Thakkar RB.	Gastroenterology	40.4	999	494	11
22064877	Iron-fortified vs low-iron infant formula: developmental outcome at 10 years.	Lozoff B, Castillo M, Clark KM, Smith JB.	Arch Pediatr Adolesc Med	0.2	999	473	9
22067661	A randomized, double-blind, controlled study of NG--4010, a capsaicin 8% dermal patch, for the treatment of painful HIV-associated distal sensory polyneuropathy.	Clifford DB, Simpson DM, Brown S, Moyle G, Brew BJ, Conway B, Tobias JK, Vanhove GF; NG--4010 C119 Study Group.	J Acquir Immune Defic Syndr	49.7	18	494	1
22067722	A comparison of the effect of glitazones on serum sialic acid in patients with type 2 diabetes.	ur Rahman I, Idrees M, Salman M, Khan RU, Khan MI, Amin F, Jan NU.	Diab Vasc Dis Res	50.6	999	60	4
22067793	Continuous oral levonorgestrel/ethinyl estradiol for treating premenstrual dysphoric disorder.	Halbreich U, Freeman EW, Rapkin AJ, Cohen LS, Grubb GS, Bergeron R, Smith L, Mirkin S, Constantine GD.	Contraception	36.1	18	367	5
22070452	Nurse-led delivery of specialist supportive care for bipolar disorder: a randomized controlled trial.	Crowe M, Inder M, Carlyle D, Wilson L, Whitehead L, Panckhurst A, O'Brien T, Frampton C, Joyce P.	J Psychiatr Ment Health Nurs	43.3	18	78	5
22070630	A randomised trial comparing the laryngeal mask airway Supremeâ?¢ with the laryngeal mask airway Uniqueâ?¢ in children.	Jagannathan N, Sohn LE, Sawardekar A, Chang E, Langen KE, Anderson K.	Anaesthesia	3.1	0.5	50	22
22071882	Placebo-controlled study of the effects of fingolimod on cardiac rate and rhythm and pulmonary function in healthy volunteers.	Schmouder R, Hariry S, David OJ.	Eur J Clin Pharmacol	36.2	19	39	9
22072272	Randomized controlled trial of acupuncture for prevention of radiation-induced -erostomia among patients with nasopharyngeal carcinoma.	Meng Z, Garcia MK, Hu C, Chiang J, Chambers M, Rosenthal DI, Peng H, Zhang Y, Zhao Q, Zhao G, Liu L, Spelman A, Palmer JL, Wei Q, Cohen L.	Cancer	47.3	18	84	2
22074592	Effectiveness and tissue compatibility of a 12-week treatment of chronic venous leg ulcers with an octenidine based antiseptic--a randomized, double-blind controlled study.	Vanscheidt W, Harding K, Teot L, Siebert J.	Int Wound J	67.8	18	126	1
22075018	Continuous epicapsular ropivacaine 0.3% infusion after minimally invasive hip arthroplasty: a prospective, randomized, double-blinded, placebo-controlled study comparing continuous wound infusion with morphine patient-controlled analgesia.	Aguirre J, Baulig B, Dora C, Ekatodramis G, Votta-Velis G, Ruland P, Borgeat A.	Anesth Analg	58	999	72	13
22076595	Randomized controlled trial of chewing gum for weight loss.	Shikany JM, Thomas AS, McCubrey RO, Beasley TM, Allison DB.	Obesity (Silver Spring)	38	19	201	4
22077192	Rivaro-aban in patients with a recent acute coronary syndrome.	Mega JL, Braunwald E, Wiviott SD, Bassand JP, Bhatt DL, Bode C, Burton P, Cohen M, Cook-Bruns N, Fo- KA, Goto S, Murphy SA, Plotnikov AN, Schneider D, Sun -, Verheugt FW, Gibson CM; ATLAS ACS 2â??TIMI 51 Investigators.	N Engl J Med	61.7	18	15526	9
22077907	A randomised controlled trial of the efficacy of supported employment.	Hoffmann H, JÃ¤ckel D, Glauser S, Kupper Z.	Acta Psychiatr Scand	33.8	18	100	5
22078337	Prospective randomised controlled trial comparing trigone-sparing versus trigone-including intradetrusor injection of abobotulinumto-inA for refractory idiopathic detrusor overactivity.	Manecksha RP, Cullen IM, Ahmad S, McNeill G, Flynn R, McDermott TE, Grainger R, Thornhill JA.	Eur Urol	49.5	18	22	14
22079769	Inferior tilt of the glenoid component does not decrease scapular notching in reverse shoulder arthroplasty: results of a prospective randomized study.	Edwards TB, Trappey GJ, Riley C, O'Connor DP, Elkousy HA, Gartsman GM.	J Shoulder Elbow Surg	69	999	42	13
22079954	The randomized comparative pediatric critical illness stress-induced immune suppression (CRISIS) prevention trial.	Carcillo JA, Dean JM, Holubkov R, Berger J, Meert KL, Anand KJ, Zimmerman J, Newth CJ, Harrison R, Burr J, Willson DF, Nicholson C; Eunice Kennedy Shriver National Institute of Child Health and Human Development (NICHD) Collaborative Pediatric Critical Care Research Network (CPCCRN).	Pediatr Crit Care Med	7	1	293	1
22080391	Influence of postoperative enteral nutrition on cellular immunity. A random double-blinded placebo controlled clinical trial.	Beier-Holgersen R, Brandstrup B.	Int J Colorectal Dis	64	999	60	3
22081052	Rikkunshito improves symptoms in PPI-refractory GERD patients: a prospective, randomized, multicenter trial in Japan.	Tominaga K, Iwakiri R, Fujimoto K, Fujiwara Y, Tanaka M, Shimoyama Y, Umegaki E, Higuchi K, Kusano M, Arakawa T; GERD 4 Study Group.	J Gastroenterol	63	999	252	11
22081256	Clopidogrel tapering as a strategy to attenuate platelet rebound phenomenon in patients with bare-metal stents.	Yedidya I, Netzer A, Vaduganathan M, Solodky A, Kornowski R, Lev EI.	J Thromb Thrombolysis	64.6	999	20	19
22083263	Stimulating visual e-ploration of the neglected space in the early stage of stroke by hemifield eye-patching: a randomized controlled trial in patients with right brain damage.	Ianes P, Varalta V, Gandolfi M, Picelli A, Corno M, Di Matteo A, Fiaschi A, Smania N.	Eur J Phys Rehabil Med	70.8	999	18	6
22085697	Subjective, psychomotor, and physiological effects of pregabalin alone and in combination with o-ycodone in healthy volunteers.	Zacny JP, Paice JA, Coalson DW.	Pharmacol Biochem Behav	26.9	21	16	6
22085870	Effect of nutrition education on e-clusive breastfeeding for nutritional outcome of low birth weight babies.	Thakur SK, Roy SK, Paul K, Khanam M, Khatun W, Sarker D.	Eur J Clin Nutr	22.4	999	184	16
22088820	NBCA medical adhesive (n-butyl-2-cyanoacrylate) versus suture for patch fi-ation in Lichtenstein inguinal herniorrhaphy: a randomized controlled trial.	Shen YM, Sun WB, Chen J, Liu SJ, Wang MG.	Surgery	61.5	18	110	11
22089267	High-dose ibuprofen for patent ductus arteriosus in e-tremely preterm infants: a randomized controlled study.	Dani C, Vangi V, Bertini G, Pratesi S, Lori I, Favelli F, Ciuti R, Bandinelli A, Martano C, Murru P, Messner H, Schena F, Mosca F.	Clin Pharmacol Ther	999	999	70	16
22089326	Comparison between intraoperative fentanyl and tramadol to improve quality of emergence.	Lin BF, Ju DT, Cherng CH, Hung NK, Yeh CC, Chan SM, Wu CT.	J Neurosurg Anesthesiol	53.5	999	110	13
22090466	Compression stockings with moderate pressure are able to reduce chronic leg oedema.	Mosti G, Picerni P, Partsch H.	Phlebology	72.5	18	42	9
22092512	Is oral health-related quality of life stable following rehabilitation with mandibular two-implant overdentures?	Jabbour Z, Emami E, de Grandmont P, Rompre PH, Feine JS.	Clin Oral Implants Res	71	65	172	22
22092692	Treatment and secondary prevention effects of the probiotics Lactobacillus paracasei or Bifidobacterium lactis on early infant eczema: randomized controlled trial with follow-up until age 3 years.	Gore C, Custovic A, Tannock GW, Munro K, Kerry G, Johnson K, Peterson C, Morris J, Chaloner C, Murray CS, Woodcock A.	Clin E-p Allergy	0.4	0.25	208	12
22095545	Fosfomycin/tobramycin for inhalation in patients with cystic fibrosis with pseudomonas airway infection.	Trapnell BC, McColley SA, Kissner DG, Rolfe MW, Rosen JM, McKevitt M, Moorehead L, Montgomery AB, Geller DE; Phase 2 FTI Study Group.	Am J Respir Crit Care Med	32	18	119	4
22098090	Effect of daily consumption of probiotic yoghurt on lipid profiles in pregnant women: a randomized controlled clinical trial.	Asemi Z, Samimi M, Tabasi Z, Talebian P, Azarbad Z, Hydarzadeh Z, Esmaillzadeh A.	J Matern Fetal Neonatal Med	24.9	18	70	15
22099051	Effect of recombinant human endostatin on radiosensitivity in patients with non-small-cell lung cancer.	Jiang -D, Dai P, Wu J, Song DA, Yu JM.	Int J Radiat Oncol Biol Phys	63.5	999	50	2
22099477	Tamsulosin for the management of distal ureteral stones in children: a prospective randomized study.	Mokhless I, Zahran AR, Youssif M, Fahmy A.	J Pediatr Urol	8.1	999	61	14
22100213	A randomized, double-blind trial comparing continuous thoracic epidural bupivacaine with and without opioid in contrast to a continuous paravertebral infusion of bupivacaine for post-thoracotomy pain.	Grider JS, Mullet TW, Saha SP, Harned ME, Sloan PA.	J Cardiothorac Vasc Anesth	54.7	999	75	10
22101394	Cue e-posure and response prevention with heavy smokers: a laboratory-based randomised placebo-controlled trial e-amining the effects of D-cycloserine on cue reactivity and attentional bias.	Kamboj SK, Joye A, Das RK, Gibson AJ, Morgan CJ, Curran HV.	Psychopharmacology (Berl)	31.2	18	32	21
22104603	Asthma in Head Start children: effects of the Breathmobile program and family communication on asthma outcomes.	Eakin MN, Rand CS, Bilderback A, Bollinger ME, Butz A, Kandasamy V, Riekert KA.	J Allergy Clin Immunol	4	2	321	10
22104618	Does health-related quality of life improve for advanced pancreatic cancer patients who respond to gemcitabine? Analysis of a randomized phase III trial of the cancer and leukemia group B (CALGB 80303).	Romanus D, Kindler HL, Archer L, Basch E, Niedzwiecki D, Weeks J, Schrag D; Cancer and Leukemia Group B.	J Pain Symptom Manage	999	999	186	2
22105813	Prevention of glucocorticoid-induced osteoporosis in immunobullous diseases with alendronate: a randomized, double-blind, placebo-controlled study.	Tee SI, Yosipovitch G, Chan YC, Chua SH, Koh ET, Chan YH, Tan SS, Tsou IY, Tan SH.	Arch Dermatol	59.2	999	44	12
22105837	Treatment of residual pockets with photodynamic therapy, diode laser, or deep scaling. A randomized, split-mouth controlled clinical trial.	Cappuyns I, Cionca N, Wick P, Giannopoulou C, Mombelli A.	Lasers Med Sci	52	25	32	22
22106843	Efficacy and safety of MAP0004, orally inhaled DHE in treating migraines with and without allodynia.	Tepper SJ, Kori SH, Borland SW, Wang MH, Hu B, Mathew NT, Silberstein SD.	Headache	40	18	792	6
22108444	The effect of simvastatin on asymmetric dimethylarginine and flow-mediated vasodilation after optimizing the LDL level: a randomized, placebo-controlled study.	Vladimirova-Kitova LG, Deneva-Koycheva TI.	Vascul Pharmacol	44.5	16	1150	9
22108765	Cognitive behavioral therapy for the treatment of juvenile fibromyalgia: a multisite, single-blind, randomized, controlled clinical trial.	Kashikar-Zuck S, Ting TV, Arnold LM, Bean J, Powers SW, Graham TB, Passo MH, Schikler KN, Hashkes PJ, Spalding S, Lynch-Jordan AM, Banez G, Richards MM, Lovell DJ.	Arthritis Rheum	15	11	114	13
22112598	E-tended prophyla-is with nevirapine and cotrimo-azole among HIV-e-posed uninfected infants is well tolerated.	Aizire J, Fowler MG, Wang J, Shetty AK, Strani--Chibanda L, Kamateeka M, Brown ER, Bolton SG, Musoke PM, Coovadia H.	AIDS	999	0	350	1
22113218	Intra-articular corticosteroid injection in diabetic patients with adhesive capsulitis: a randomized controlled trial.	Roh YH, Yi SR, Noh JH, Lee SY, Oh JH, Gong HS, Baek GH.	Knee Surg Sports Traumatol Arthrosc	54.8	999	45	13
22114108	Long-term outcome in couples with une-plained subfertility and an intermediate prognosis initially randomized between e-pectant management and immediate treatment.	Custers IM, van Rumste MM, van der Steeg JW, van Wely M, Hompes PG, Bossuyt P, Broekmans FJ, Renckens CN, Eijkemans MJ, van Dessel TJ, van der Veen F, Mol BW, Steures P; CECERM.	Hum Reprod	33	999	253	21
22114200	Sensitivity to change and responsiveness of four balance measures for community-dwelling older adults.	Pardasaney PK, Latham NK, Jette AM, Wagenaar RC, Ni P, Slavin MD, Bean JF.	Phys Ther	75.9	65	111	5
22115409	Transurethral resection of prostate with plasmakinetic energy: 100 months results of a prospective randomized trial.	Muslumanoglu AY, Yuruk E, Binbay M, Akman T.	BJU Int	69	999	101	14
22115823	Sublingual buprenorphine in acute pain management: a double-blind randomized clinical trial.	Jalili M, Fathi M, Moradi-Lakeh M, Zehtabchi S.	Ann Emerg Med	35	16	110	20
22116795	Functional and muscular effects of neuromuscular electrical stimulation in patients with severe COPD: a randomized clinical trial.	Vivodtzev I, Debigare R, Gagnon P, Mainguy V, Saey D, Dube A, Pare MÃ?, Belanger M, Maltais F.	Chest	69	999	20	10
22118560	Low-molecular-weight heparin added to aspirin in the prevention of recurrent early-onset pre-eclampsia in women with inheritable thrombophilia: the FRUIT-RCT.	de Vries JI, van Pampus MG, Hague WM, Bezemer PD, Joosten JH; FRUIT Investigators.	J Thromb Haemost	29.1	18	139	15
22118603	Visual outcome of Soflens Daily Disposable and Soflens Daily Disposable for Astigmatism in subjects with low astigmatism.	Cho P, Cheung SW, Charm J.	Clin E-p Optom	23.3	18	41	7
22119204	A phase III trial of doceta-el-estramustine in high-risk localised prostate cancer: a planned analysis of response, to-icity and quality of life in the GETUG 12 trial.	Fizazi K, Lesaunier F, Delva R, Gravis G, Rolland F, Priou F, Ferrero JM, Houede N, Mourey L, Theodore C, Krakowski I, Berdah JF, Baciuchka M, Laguerre B, Flechon A, Ravaud A, Cojean-Zelek I, Oudard S, Labourey JL, Lagrange JL, Chinet-Charrot P, Linassier C, et al.	Eur J Cancer	63	999	413	2
22119930	Granulocyte colony-stimulating factor mobilizes CD34(+) cells and improves survival of patients with acute-on-chronic liver failure.	Garg V, Garg H, Khan A, Trehanpati N, Kumar A, Sharma BC, Sakhuja P, Sarin SK.	Gastroenterology	40	12	47	11
22119995	The association between quality of life domains and overall survival in ovarian cancer patients during adjuvant chemotherapy: a Gynecologic Oncology Group Study.	von Gruenigen VE, Huang HQ, Gil KM, Frasure HE, Armstrong DK, Wenzel LB.	Gynecol Oncol	999	999	415	2
22120044	Steady state visually evoked potential (SSVEP) topography changes associated with cocoa flavanol consumption.	Camfield DA, Scholey A, Pipingas A, Silberstein R, Kras M, Nolidin K, Wesnes K, Pase M, Stough C.	Physiol Behav	52.3	40	63	18
22120130	Long-term omega-3 polyunsaturated fatty acid supplementation reduces the recurrence of persistent atrial fibrillation after electrical cardioversion.	Kumar S, Sutherland F, Morton JB, Lee G, Morgan J, Wong J, Eccleston DE, Voukelatos J, Garg ML, Sparks PB.	Heart Rhythm	62	18	178	9
22121129	Golimumab in combination with methotre-ate in Japanese patients with active rheumatoid arthritis: results of the GO-FORTH study.	Tanaka Y, Harigai M, Takeuchi T, Yamanaka H, Ishiguro N, Yamamoto K, Miyasaka N, Koike T, Kanazawa M, Oba T, Yoshinari T, Baker D; GO-FORTH Study Group.	Ann Rheum Dis	50.5	20	261	13
22127230	Intake of branched-chain amino acids influences the levels of MAFbx mRNA and MuRF-1 total protein in resting and exercising human muscle	Borgenvik M, Apro W, Blomstrand E	Am J Physiol Endocrinol Metab	27	999	7	4
22130792	Treatment of amiodarone-induced thyroto-icosis type 2: a randomized clinical trial.	Eskes SA, Endert E, Fliers E, Geskus RB, Dullaart RP, Links TP, Wiersinga WM.	J Clin Endocrinol Metab	54.8	999	36	4
22133656	The effect of perioperative ketorolac on pain control in pregnancy termination.	Roche NE, Li D, James D, Fechner A, Tilak V.	Contraception	25.3	18	76	15
22134043	Efficacy and safety of olanzapine in the treatment of Japanese patients with bipolar I disorder in a current manic or mi-ed episode: a randomized, double-blind, placebo- and haloperidol-controlled study.	Katagiri H, Takita Y, Tohen M, Higuchi T, Kanba S, Takahashi M.	J Affect Disord	43.4	20	221	5
22134388	Effect of felodipine with irbesartan or metoprolol on se-ual function and o-idative stress in women with essential hypertension.	Ma R, Yu J, -u D, Yang L, Lin -, Zhao F, Bai F.	J Hypertens	46.9	18	141	9
22137859	Hematological clozapine monitoring with a point-of-care device: a randomized cross-over trial.	Nielsen J, Thode D, Stenager E, Andersen KÃ?, Sondrup U, Hansen TN, Munk AM, Lykkegaard S, Gosvig A, Petrov I, le Quach P.	Eur Neuropsychopharmacol	45.6	999	85	5
22139591	Lamotrigine -R conversion to monotherapy: first study using a historical control group.	French JA, Temkin NR, Shneker BF, Hammer AE, Caldwell PT, Messenheimer JA.	Neurotherapeutics	32	13	223	6
22142823	Tumor infiltration by T lymphocytes e-pressing chemokine receptor 7 (CCR7) is predictive of favorable outcome in patients with advanced colorectal carcinoma.	Correale P, Rotundo MS, Botta C, Del Vecchio MT, Ginanneschi C, Licchetta A, Conca R, Apollinari S, De Luca F, Tassone P, Tagliaferri P.	Clin Cancer Res	65	999	76	2
22143708	A prospective, randomized, triple-blind comparison of articaine and bupivacaine for ma-illary infiltrations.	VÃ­lchez-Perez MA, Sancho-Puchades M, Valmaseda-CastellÃ³n E, Paredes-GarcÃ­a J, Berini-Aytes L, Gay-Escoda C.	Med Oral Patol Oral Cir Bucal	22.8	18	20	22
22146280	Effect of core stability e-ercises on feed-forward activation of deep abdominal muscles in chronic low back pain: a randomized controlled trial.	Vasseljen O, Unsgaard-TÃ¸ndel M, Westad C, Mork PJ.	Spine (Phila Pa 1976)	40.1	18	102	13
22146409	Comparison of two dosing frequencies of subcutaneous interferon beta-1a in patients with a first clinical demyelinating event suggestive of multiple sclerosis (REFLE-): a phase 3 randomised controlled trial.	Comi G, De Stefano N, Freedman MS, Barkhof F, Polman CH, Uitdehaag BM, Casset-Semanaz F, Hennessy B, Moraga MS, Rocak S, Stubinski B, Kappos L.	Lancet Neurol	30.7	18	517	6
22147444	A randomized controlled trial of ritu-imab following failure of antiviral therapy for hepatitis C virus-associated cryoglobulinemic vasculitis.	Sneller MC, Hu Z, Langford CA.	Arthritis Rheum	52	999	24	1
22148989	Contemplative/emotion training reduces negative emotional behavior and promotes prosocial responses.	Kemeny ME, Foltz C, Cavanagh JF, Cullen M, Giese-Davis J, Jennings P, Rosenberg EL, Gillath O, Shaver PR, Wallace BA, Ekman P.	Emotion	41.1	25	82	5
22149065	Effects of vitamin D3 and calcium supplementation on serum levels of tocopherols, retinol, and specific vitamin D metabolites.	Chai W, Bostick RM, Ahearn TU, Franke AA, Custer LJ, Cooney RV.	Nutr Cancer	60.5	30	92	2
22150634	An efficacy study of a combined parent and teacher management training programme for children with ADHD.	Ostberg M, Rydell AM.	Nord J Psychiatry	10.9	7	61	5
22152078	Effect of different types of lower body resistance training on arterial compliance and calf blood flow.	Fahs CA, Rossow LM, Loenneke JP, Thiebaud RS, Kim D, Bemben DA, Bemben MG.	Clin Physiol Funct Imaging	21	18	46	9
22152121	Motivational interviewing and interaction skills training for parents to change cannabis use in young adults with recent-onset schizophrenia: a randomized controlled trial.	Smeerdijk M, Keet R, Dekker N, van Raaij B, Krikke M, Koeter M, de Haan L, Barrowclough C, Schippers G, Linszen D.	Psychol Med	22.9	16	50	5
22152942	Prospective randomized comparison of conventional instruments and the Harmonic Focus(Â®) device in breast-conserving therapy for primary breast cancer.	Bohm D, Kubitza A, Lebrecht A, Schmidt M, Gerhold-Ay A, Battista M, Stewen K, Solbach C, Kolbl H.	Eur J Surg Oncol	57.9	18	106	2
22152978	Effects of e-ercise training on pulmonary mechanics and functional status in patients with prolonged mechanical ventilation.	Chen YH, Lin HL, Hsiao HF, Chou LT, Kao KC, Huang CC, Tsai YH.	Respir Care	65.7	999	27	10
22153770	Cycling e-ercise with functional electrical stimulation improves postural control in stroke patients.	Lo HC, Hsu YC, Hsueh YH, Yeh CY.	Gait Posture	49.6	999	20	6
22155106	Lactobacillus fermentum CECT 5716 is safe and well tolerated in infants of 1-6 months of age: a randomized controlled trial.	Gil-Campos M, LÃ³pez MÃ, Rodriguez-BenÃ­tez MV, Romero J, Roncero I, Linares MD, Maldonado J, LÃ³pez-Huertas E, Berwind R, Ritzenthaler KL, Navas V, Sierra C, Sempere L, Geerlings A, Maldonado-LobÃ³n JA, Valero AD, Lara-Villoslada F, Olivares M.	Pharmacol Res	0.1	1	137	1
22156314	Randomized study on the efficacy and safety of landiolol, an ultra-short-acting Î²1-adrenergic blocker, in patients with acute myocardial infarction undergoing primary percutaneous coronary intervention.	Hanada K, Higuma T, Nishizaki F, Sukekawa T, Yokota T, Yamada M, Saito S, Kushibiki M, Oikawa K, Abe N, Tomita H, Osanai T, Okumura K.	Circ J	62.4	999	96	9
22158728	Increasing food acceptance in the home setting: a randomized controlled trial of parent-administered taste e-posure with incentives.	Remington A, AÃ±ez E, Croker H, Wardle J, Cooke L.	Am J Clin Nutr	4	3	173	5
22159967	Harmonic scalpel versus bipolar tonsillectomy: a double-blind clinical trial.	Kemal O.	Eur Arch Otorhinolaryngol	9	999	144	10
22160495	Fish oil supplementation improves neutrophil function during cancer chemotherapy.	Bonatto SJ, Oliveira HH, Nunes EA, Pequito D, Iagher F, Coelho I, Naliwaiko K, Kryczyk M, Brito GA, Repka J, SabÃ³ia LV, Fukujima G, Calder PC, Fernandes LC.	Lipids	54.4	999	38	2
22160847	Blood pressure monitoring technique impacts hypertension treatment.	Ray GM, Nawarskas JJ, Anderson JR.	J Gen Intern Med	56.6	18	40	9
22162175	Effect of bivalirudin compared with unfractionated heparin plus abci-imab on infarct size and myocardial recovery after primary percutaneous coronary intervention: the horizons-AMI CMRI substudy.	Wohrle J, Merkle N, Kunze M, Cristea E, Mehran R, Rottbauer W, Stone GW.	Catheter Cardiovasc Interv	63.4	999	51	9
22166557	Balapiravir plus peginterferon alfa-2a (40KD)/ribavirin in a randomized trial of hepatitis C genotype 1 patients.	Nelson DR, Zeuzem S, Andreone P, Ferenci P, Herring R, Jensen DM, Marcellin P, Pockros PJ, RodrÃ­guez-Torres M, Rossaro L, Rustgi VK, Sepe T, Sulkowski M, Thomason IR, Yoshida EM, Chan A, Hill G.	Ann Hepatol	44.1	18	516	1
22167566	Evaluation of the effects of a high-fat meal on the oral bioavailability of a single dose of preladenant in healthy subjects.	Cutler DL, Tendolkar A, Grachev ID.	J Clin Pharmacol	30	18	24	6
22168345	The effects of acute alcohol consumption on recovery from a simulated rugby match.	Barnes MJ, Mundel T, Stannard SR.	J Sports Sci	21.3	999	10	22
22169408	Efficacy and safety of mo-iflo-acin as antibacterial prophyla-is for patients receiving autologous haematopoietic stem cell transplantation: a randomised trial.	Vehreschild JJ, Moritz G, Vehreschild MJ, Arenz D, Mahne M, Bredenfeld H, Chemnitz J, Klein F, Cremer B, Boll B, Kaul I, Wassmer G, Hallek M, Scheid C, Cornely OA.	Int J Antimicrob Agents	52	18	66	1
22169672	Does implant staging choice affect crestal bone loss?	Siadat H, Panjnoosh M, Alikhasi M, Alihoseini M, Bassir SH, Rokn AR.	J Oral Ma-illofac Surg	46.9	21	11	22
22169831	Efficacy of low level laser therapy associated with e-ercises in knee osteoarthritis: a randomized double-blind study.	Alfredo PP, Bjordal JM, Dreyer SH, Meneses SR, Zaguetti G, Ovanessian V, Fukuda TY, Junior WS, Lopes Martins RÃ, Casarotto RA, Marques AP.	Clin Rehabil	61.7	50	40	13
22170083	Randomized clinical trial on preoperative radiotherapy 25 Gy in rectal cancer--treatment results at 5-year follow-up.	Pach R, Kulig J, Richter P, Gach T, Szura M, Kowalska T.	Langenbecks Arch Surg	61.5	999	154	2
22170366	A novel fortified blended flour, corn-soy blend plus-plus is not inferior to lipid-based ready-to-use supplementary foods for the treatment of moderate acute malnutrition in Malawian children.	LaGrone LN, Trehan I, Meuli GJ, Wang RJ, Thakwalakwa C, Maleta K, Manary MJ.	Am J Clin Nutr	1.6	0.5	2712	4
22170799	The impact of medication on vitamin D status in older individuals.	Sohl E, van Schoor NM, de Jongh RT, de Vries OJ, Lips P.	Eur J Endocrinol	69.9	55	2037	22
22170862	A randomized controlled trial of fetal endoscopic tracheal occlusion versus postnatal management of severe isolated congenital diaphragmatic hernia.	Ruano R, Yoshisaki CT, da Silva MM, Ceccon ME, Grasi MS, Tannuri U, Zugaib M.	Ultrasound Obstet Gynecol	0	999	41	10
22172305	Intermittent preventive therapy for malaria with monthly artemether-lumefantrine for the post-discharge management of severe anaemia in children aged 4-59 months in southern Malawi: a multicentre, randomised, placebo-controlled trial.	Phiri K, Esan M, van Hensbroek MB, Khairallah C, Faragher B, ter Kuile FO.	Lancet Infect Dis	2	0.3	1414	1
22172433	A cardiovascular safety study of LibiGel (testosterone gel) in postmenopausal women with elevated cardiovascular risk and hypoactive se-ual desire disorder.	White WB, Grady D, Giudice LC, Berry SM, Zborowski J, Snabes MC.	Am Heart J	58.6	50	2889	5
22172725	Osteoprotegerin as a predictor of renal and cardiovascular outcomes in renal transplant recipients: follow-up data from the ALERT study.	Svensson M, Dahle DO, MjÃ¸en G, Weihrauch G, Scharnagl H, Dobnig H, MÃ¤rz W, Jardine A, Fellstrom B, Holdaas H.	Nephrol Dial Transplant	49.7	30	1889	14
22173517	A randomized, double-blind, placebo-controlled trial of selective digestive decontamination using oral gentamicin and oral polymy-in E for eradication of carbapenem-resistant Klebsiella pneumoniae carriage.	Saidel-Odes L, Polachek H, Peled N, Riesenberg K, Schlaeffer F, Trabelsi Y, Eskira S, Yousef B, Smolykov R, Codish S, Borer A.	Infect Control Hosp Epidemiol	71	18	40	10
22173608	Treatment of MM-associated spinal fracture with percutaneous vertebroplasty (PVP) and chemotherapy.	Yang Z, Tan J, -u Y, Sun H, -ie L, Zhao R, Wang J, Jiang H.	Eur Spine J	59.3	999	76	6
22173883	The Blue Dog: evaluation of an interactive software program to teach young children how to interact safely with dogs.	Schwebel DC, Morrongiello BA, Davis AL, Stewart J, Bell M.	J Pediatr Psychol	4.8	3.5	76	20
22175445	Collaborative behavioral management among parolees: drug use, crime and re-arrest in the Step'n Out randomized trial.	Friedmann PD, Green TC, Ta-man FS, Harrington M, Rhodes AG, Katz E, O'Connell D, Martin SS, Frisman LK, Litt M, Burdon W, Clarke JG, Fletcher BW; Step'n Out Research Group of CJ-DATS.	Addiction	33.9	18	569	5
22176842	Fax referrals, academic detailing, and tobacco quitline use: a randomized trial.	Sheffer MA, Baker TB, Fraser DL, Adsit RT, McAfee TA, Fiore MC.	Am J Prev Med	999	999	999	5
22178084	Adjunctive armodafinil for negative symptoms in adults with schizophrenia: a double-blind, placebo-controlled study.	Kane JM, Yang R, Youakim JM.	Schizophr Res	43.4	18	285	5
22178174	Optimized project of traditional Chinese medicine in treating chronic kidney disease stage 3: a multicenter double-blinded randomized controlled trial.	Wang YJ, He LQ, Sun W, Lu Y, Wang -Q, Zhang PQ, Wei LB, Cao SL, Yang NZ, Ma HZ, Gao J, Li P, Tao -J, Yuan FH, Li J, Yao C, Liu -.	J Ethnopharmacol	48.5	18	592	14
22178819	Fruit and vegetable intake among rural youth following a school-based randomized controlled trial.	Wilson DB, Jones RM, McClish D, Westerberg AL, Danish S.	Prev Med	12.7	999	1119	19
22180255	Who may have durable benefit from robotic gait training?: a 2-year follow-up randomized controlled trial in patients with subacute stroke.	Morone G, Iosa M, Bragoni M, De Angelis D, Venturiero V, Coiro P, Riso R, Pratesi L, Paolucci S.	Stroke	61.3	999	48	6
22180621	The setpoint study (ACTG A5217): effect of immediate versus deferred antiretroviral therapy on virologic set point in recently HIV-1-infected individuals.	Hogan CM, Degruttola V, Sun -, Fiscus SA, Del Rio C, Hare CB, Markowitz M, Connick E, Macatangay B, Tashima KT, Kallungal B, Camp R, Morton T, Daar ES, Little S; A5217 Study Team.	J Infect Dis	36	18	79	1
22180622	A simplified intravenous artesunate regimen for severe malaria.	Kremsner PG, Taylor T, Issifou S, Kombila M, Chimalizeni Y, Kawaza K, Bouyou Akotet MK, Duscha M, Mordmuller B, Kosters K, Humberg A, Miller RS, Weina P, Duparc S, Mohrle J, Kun JF, Planche T, Teja-Isavadharm P, Simpson JA, Kohler C, Krishna S.	J Infect Dis	999	0.5	182	1
22182262	Attendance and substance use outcomes for the Seeking Safety program: sometimes less is more.	Hien DA, Morgan-Lopez AA, Campbell AN, Saavedra LM, Wu E, Cohen L, Ruglass L, Nunes EV.	J Consult Clin Psychol	39.2	18	353	5
22184384	Phase III trial comparing capecitabine plus cisplatin versus capecitabine plus cisplatin with concurrent capecitabine radiotherapy in completely resected gastric cancer with D2 lymph node dissection: the ARTIST trial.	Lee J, Lim do H, Kim S, Park SH, Park JO, Park YS, Lim HY, Choi MG, Sohn TS, Noh JH, Bae JM, Ahn YC, Sohn I, Jung SH, Park CK, Kim KM, Kang WK.	J Clin Oncol	56	18	458	2
22184645	Early intervention improves behavioral outcomes for preterm infants: randomized controlled trial.	Nordhov SM, RÃ¸nning JA, Ulvund SE, Dahl LB, Kaaresen PI.	Pediatrics	0	999	221	16
22185955	Chiropractic treatment vs self-management in patients with acute chest pain: a randomized controlled trial of patients without acute coronary syndrome.	Stochkendahl MJ, Christensen HW, Vach W, HÃ¸ilund-Carlsen PF, Haghfelt T, Hartvigsen J.	J Manipulative Physiol Ther	51.1	18	115	13
22186668	Dynamic, adaptive changes in MAO-A binding after alterations in substrate availability: an in vivo [(11)C]-harmine positron emission tomography study.	Sacher J, Rabiner EA, Clark M, Rusjan P, Soliman A, Boskovic R, Kish SJ, Wilson AA, Houle S, Meyer JH.	J Cereb Blood Flow Metab	25	999	19	5
22188546	Right here, right now: the impact of the blood donation conte-t on an-iety, attitudes, subjective norms, self-efficacy, and intention to donate blood.	Clowes R, Masser BM.	Transfusion	20.1	999	76	21
22189652	Core temperatures during major abdominal surgery in patients warmed with new circulating-water garment, forced-air warming, or carbon-fiber resistive-heating system.	Hasegawa K, Negishi C, Nakagawa F, Ozaki M.	J Anesth	62	20	36	11
22190336	An e-tended theory of planned behavior intervention for older adults with type 2 diabetes and cardiovascular disease.	White KM, Terry DJ, Troup C, Rempel LA, Norman P, Mummery K, Riley M, Posner N, Kenardy J.	J Aging Phys Act	61.2	999	183	4
22192104	Feasibility of totally tubeless percutaneous nephrolithotomy under the age of 14 years: a randomized clinical trial.	Aghamir SM, Salavati A, Aloosh M, Farahmand H, Meysamie A, Pourmand G.	J Endourol	10.7	999	23	14
22194005	Effects of high-intensity interval training on pulmonary function.	Dunham C, Harms CA.	Eur J Appl Physiol	20.7	999	15	10
22194501	Comparative effectiveness of positron emission mammography and MRI in the contralateral breast of women with newly diagnosed breast cancer.	Berg WA, Madsen KS, Schilling K, Tartar M, Pisano ED, Larsen LH, Narayanan D, Kalinyak JE.	AJR Am J Roentgenol	57.8	25	367	2
22196293	A randomized study comparing corticosteroid injection to corticosteroid iontophoresis for lateral epicondylitis.	Stefanou A, Marshall N, Holdan W, Siddiqui A.	J Hand Surg Am	43	18	101	13
22196835	Effect of a medication-taking behavior feedback theory-based intervention on outcomes in patients with heart failure.	Wu JR, Corley DJ, Lennie TA, Moser DK.	J Card Fail	59.8	999	82	9
22197080	The efficacy of supported employment for middle-aged and older people with schizophrenia.	Twamley EW, Vella L, Burton CZ, Becker DR, Bell MD, Jeste DV.	Schizophr Res	51	45	58	5
22197474	Efficacy and safety of do-epin 6 mg in a four-week outpatient trial of elderly adults with chronic primary insomnia.	Lankford A, Rogowski R, Essink B, Ludington E, Heith Durrence H, Roth T.	Sleep Med	72.4	65	254	5
22198375	The impact of increasing sleep restriction on cortisol and daytime sleepiness in adolescents.	Voderholzer U, Piosczyk H, Holz J, Feige B, Loessl B, Kopasz M, Riemann D, Nissen C.	Neurosci Lett	15	14	76	4
22198456	A randomized, naturalistic, parallel-group study for the long-term treatment of panic disorder with clonazepam or paro-etine.	Nardi AE, Freire RC, Mochcovitch MD, Amrein R, Levitan MN, King AL, Valenca AM, Veras AB, Paes F, Sardinha A, Nascimento I, de-Melo-Neto VL, Dias GP, E Silva AC, Soares-Filho GL, da Costa RT, Mezzasalma MA, de Carvalho MR, de Cerqueira AC, Hallak JE, Crippa JA, Versiani M.	J Clin Psychopharmacol	34.9	18	84	5
22198635	Cromoglycate, reproterol, or both--what's best for e-ercise-induced asthma?	Kupper T, Goebbels K, Kennes LN, Netzer NC.	Sleep Breath	999	18	11	10
22200343	Knowledge matters--impact of two types of information brochure on contraceptive knowledge, attitudes and intentions.	Vogt C, Schaefer M.	Eur J Contracept Reprod Health Care	20.6	18	132	21
22200586	A population-based randomized controlled trial of the effect of combining a pedometer with an intervention toolkit on physical activity among individuals with low levels of physical activity or fitness.	Petersen CB, Severin M, Hansen AW, Curtis T, GrÃ¸nbÃ¦k M, Tolstrup JS.	Prev Med	52	18	655	5
22201688	Heart rate responses and technical-tactical aspects of official 5-a-side youth soccer matches played on clay and artificial turf.	Tessitore A, Perroni F, Meeusen R, Cortis C, Lupo C, Capranica L.	J Strength Cond Res	8.8	8	22	5
22202581	Assessment of prognostic circulating tumor cells in a phase III trial of adjuvant immunotherapy after complete resection of stage IV melanoma.	Hoshimoto S, Faries MB, Morton DL, Shingai T, Kuo C, Wang HJ, Elashoff R, Mozzillo N, Kelley MC, Thompson JF, Lee JE, Hoon DS.	Ann Surg	54.7	18	444	2
22202972	The effects of the Kampo medicine (Japanese herbal medicine) Daikenchuto" on the surgical inflammatory response following laparoscopic colorectal resection."	Yoshikawa K, Shimada M, Nishioka M, Kurita N, Iwata T, Morimoto S, Miyatani T, Komatsu M, Kashihara H, Mikami C.	Surg Today	66	999	30	11
22205496	A randomized trial of budiodarone in paro-ysmal atrial fibrillation.	Ezekowitz MD, Nagarakanti R, Lubinski A, Bandman O, Canafa- D, Ellis DJ, Milner PG, Ziola M, Thibault B, Hohnloser SH; PASCAL Investigators.	J Interv Card Electrophysiol	69.2	999	72	9
22207530	Use of Floseal and effects on wound healing and pain in adults undergoing tonsillectomy: randomised comparison versus electrocautery.	Mozet C, Prettin C, Dietze M, Fickweiler U, Dietz A.	Eur Arch Otorhinolaryngol	999	18	176	10
22208805	The effects of ethanol on the bioavailability of o-ymorphone e-tended-release tablets and o-ymorphone crush-resistant e-tended-release tablets.	Fiske WD, Jobes J, -iang Q, Chang SC, Benedek IH.	J Pain	31	22	30	14
22209175	Impact of patients' positions on the incidence of arrhythmias during pulmonary artery catheterization.	Pipanmekaporn T, Bunchungmongkol N, Pin on P, Punjasawadwong Y.	J Cardiothorac Vasc Anesth	61.5	18	140	9
22209190	A 40-week double-blind aripiprazole versus lithium follow-up of a 12-week acute phase study (total 52 weeks) in bipolar I disorder.	El-Mallakh RS, Marcus R, Baudelet C, McQuade R, Carson WH, Owen R.	J Affect Disord	39.6	999	63	5
22209386	Effects of cold pressor pain on the abuse liability of intranasal o-ycodone in male and female prescription opioid abusers.	Lofwall MR, Nuzzo PA, Walsh SL.	Drug Alcohol Depend	28.1	18	20	5
22210087	Age-specific nonpersistence of endocrine therapy in postmenopausal patients diagnosed with hormone receptor-positive breast cancer: a TEAM study analysis.	van de Water W, Bastiaannet E, Hille ET, Meershoek-Klein Kranenbarg EM, Putter H, Seynaeve CM, Paridaens R, de Craen AJ, Westendorp RG, Liefers GJ, van de Velde CJ.	Oncologist	65.2	999	3142	2
22210231	Thiopental-induced burst suppression measured by the bispectral inde- is e-tended during propofol administration compared with sevoflurane.	Yoon JR, Kim YS, Kim TK.	J Neurosurg Anesthesiol	56	999	46	6
22210721	Comparative analysis between nasolabial and island pedicle flaps in the ala nose reconstruction. Prospective study.	Monarca C, Rizzo MI, Palmieri A, Chiummariello S, Fino P, Scuderi N.	In Vivo	63.4	50	60	2
22211444	Relationships among childhood trauma, posttraumatic stress disorder, and dissociation in men living with HIV/AIDS.	Kamen C, Bergstrom J, Koopman C, Lee S, Gore-Felton C.	J Trauma Dissociation	45	18	167	5
22215002	Efficacy and safety of pregabalin in the treatment of alcohol withdrawal syndrome: a randomized placebo-controlled trial.	Forg A, Hein J, Volkmar K, Winter M, Richter C, Heinz A, Muller CA.	Alcohol Alcohol	43.9	18	42	5
22215165	Effect of dietary protein content on weight gain, energy e-penditure, and body composition during overeating: a randomized controlled trial.	Bray GA, Smith SR, de Jonge L, -ie H, Rood J, Martin CK, Most M, Brock C, Mancuso S, Redman LM.	JAMA	24.2	18	25	4
22215856	Myocardial ischemic events in patients with atrial fibrillation treated with dabigatran or warfarin in the RE-LY (Randomized Evaluation of Long-Term Anticoagulation Therapy) trial.	Hohnloser SH, Oldgren J, Yang S, Wallentin L, Ezekowitz M, Reilly P, Eikelboom J, Brueckmann M, Yusuf S, Connolly SJ.	Circulation	999	65	18113	9
22216054	A comparative randomised controlled trial of the effects of brain wave vibration training, iyengar yoga, and mindfulness on mood, well-being, and salivary cortisol.	Bowden D, Gaudry C, An SC, Gruzelier J.	Evid Based Complement Alternat Med	999	999	33	5
22217551	Clinical evaluation of an autofluorescence diagnostic device for oral cancer detection: a prospective randomized diagnostic study.	Rana M, Zapf A, Kuehle M, Gellrich NC, Eckardt AM.	Eur J Cancer Prev	63.2	18	289	2
22218160	Increased intake of oily fish in pregnancy: effects on neonatal immune responses and on clinical outcomes in infants at 6 mo.	Noakes PS, Vlachava M, Kremmyda LS, Diaper ND, Miles EA, Erlewyn-Lajeunesse M, Williams AP, Godfrey KM, Calder PC.	Am J Clin Nutr	29	18	123	12
22218933	A randomized-controlled trial of intensive case management emphasizing the recovery model among patients with severe and enduring mental illness.	O'Brien S, McFarland J, Kealy B, Pullela A, Saunders J, Cullen W, Meagher D.	Ir J Med Sci	44.5	18	80	5
22219220	Efficacy of a dose range of surinabant, a cannabinoid receptor blocker, for smoking cessation: a randomized controlled clinical trial.	Tonstad S, Aubin HJ.	J Psychopharmacol	45	18	810	5
22219315	A reduced-dose seasonal trivalent influenza vaccine is safe and immunogenic in adult and elderly patients in a randomized controlled trial.	Vajo Z, Tamas F, Jankovics I.	Clin Vaccine Immunol	54.7	18	234	1
22219335	Acetazolamide improves loop gain but not the other physiological traits causing obstructive sleep apnoea.	Edwards BA, Sands SA, Eckert DJ, White DP, Butler JP, Owens RL, Malhotra A, Wellman A.	J Physiol	50	999	13	6
22220822	Full-mouth disinfection and systemic antimicrobial therapy in generalized aggressive periodontitis: a randomized, placebo-controlled trial.	Aimetti M, Romano F, Guzzi N, Carnevale G.	J Clin Periodontol	36	999	39	22
22220945	Effects of intravenous de-medetomidine on low-dose bupivacaine spinal anaesthesia in elderly patients.	Hong JY, Kim WO, Yoon Y, Choi Y, Kim SH, Kil HK.	Acta Anaesthesiol Scand	74.4	65	51	22
22222634	Perampanel in Parkinson disease fluctuations: a double-blind randomized trial with placebo and entacapone.	Rascol O, Barone P, Behari M, Emre M, Giladi N, Olanow CW, Ruzicka E, Bibbiani F, Squillacote D, Patten A, Tolosa E.	Clin Neuropharmacol	63.4	30	723	6
22226132	Hemolysis of coagulation specimens: a comparative study of intravenous draw methods.	Stauss M, Sherman B, Pugh L, Parone D, Looby-Rodriguez K, Bell A, Reed CR.	J Emerg Nurs	60.5	21	121	3
22226683	Intra-fraction motion during e-treme hypofractionated radiotherapy of the prostate using pre- and post-treatment imaging.	Quon H, Loblaw DA, Cheung PC, Holden L, Tang C, Pang G, Morton G, Mamedov A, Deabreu A.	Clin Oncol (R Coll Radiol)	999	999	53	2
22227168	Safety-promoting behaviors of community-dwelling abused Chinese women after an advocacy intervention: a randomized controlled trial.	Tiwari A, Fong DY, Wong JY, Yuen KH, Yuk H, Pang P, Humphreys J, Bullock L.	Int J Nurs Stud	38.1	18	200	5
22228325	Tracheal traction e-ercise reduces the occurrence of postoperative dysphagia after anterior cervical spine surgery.	Chen Z, Wei -, Li F, He P, Huang -, Zhang F, Qi K, Liu -, Shen H, Hou T, Riew KD.	Spine (Phila Pa 1976)	54.5	999	102	13
22228415	A randomized trial with steroids and antithymocyte globulins comparing cyclosporine/azathioprine versus tacrolimus/mycophenolate mofetil (CATM2) in renal transplantation.	Vacher-Coponat H, Moal V, Indreies M, Purgus R, Loundou A, Burtey S, Brunet P, Moussi-Frances J, Daniel L, Dussol B, Berland Y.	Transplantation	46.5	18	289	20
22228638	Randomized phase II trial of sorafenib with temsirolimus or tipifarnib in untreated metastatic melanoma (S0438).	Margolin KA, Moon J, Flaherty LE, Lao CD, Akerley WL 3rd, Othus M, Sosman JA, Kirkwood JM, Sondak VK.	Clin Cancer Res	61.3	999	102	2
22228772	Gender-based divergence of cardiovascular outcomes in asymptomatic patients with type 2 diabetes: results from the DIAD study.	Tandon S, Wackers FJ, Inzucchi SE, Bansal S, Staib LH, Chyun DA, Davey JA, Young LH; DIAD Investigators.	Diab Vasc Dis Res	60.7	50	1123	9
22230921	Effect of acute and short-term oral salbutamol treatments on maximal power output in non-asthmatic athletes.	Sanchez AM, Collomp K, Carra J, Borrani F, Coste O, Prefaut C, Candau R.	Eur J Appl Physiol	23.3	999	8	5
22231607	Statin use and risk of diabetes mellitus in postmenopausal women in the Women's Health Initiative.	Culver AL, Ockene IS, Balasubramanian R, Olendzki BC, Sepavich DM, Wactawski-Wende J, Manson JE, Qiao Y, Liu S, Merriam PA, Rahilly-Tierny C, Thomas F, Berger JS, Ockene JK, Curb JD, Ma Y.	Arch Intern Med	63.2	50	153840	4
22232535	Short term outcomes of prostate biopsy in men tested for cancer by prostate specific antigen: prospective evaluation within ProtecT study.	Rosario DJ, Lane JA, Metcalfe C, Donovan JL, Doble A, Goodwin L, Davis M, Catto JW, Avery K, Neal DE, Hamdy FC.	BMJ	62.1	50	1147	2
22233253	Effects on innate immunity of a therapeutic dendritic cell-based vaccine for HIV-1 infection.	PeÃ±a J, FrÃ­as M, Castro-Orgaz L, GonzÃ¡lez R, GarcÃ­a F, Gallart T, Gatell JM, Plana M; Dc2-Manon07 Vaccine Research Group.	Viral Immunol	999	999	22	1
22233397	A randomized placebo-controlled study of noninvasive cortical electrostimulation in the treatment of fibromyalgia patients.	Hargrove JB, Bennett RM, Simons DG, Smith SJ, Nagpal S, Deering DE.	Pain Med	52.6	999	77	13
22233415	Thymosin alpha-1 with peginterferon alfa-2a/ribavirin for chronic hepatitis C not responsive to IFN/ribavirin: an adjuvant role?	Ciancio A, Andreone P, Kaiser S, Mangia A, Milella M, SolÃ R, Pol S, Tsianos E, De Rosa A, Camerini R, McBeath R, Rizzetto M.	J Viral Hepat	51.2	999	552	1
22234519	Health-related quality of life, psychological distress, and adverse events in postmenopausal women with breast cancer who receive tamo-ifen, e-emestane, or anastrozole as adjuvant endocrine therapy: National Surgical Adjuvant Study of Breast Cancer 04 (N-SAS BC 04).	Takei H, Ohsumi S, Shimozuma K, Takehara M, Suemasu K, Ohashi Y, Hozumi Y.	Breast Cancer Res Treat	63	999	166	2
22236044	Randomized Controlled Trial to Compare Two Bone Substitutes in the Treatment of Bony Dehiscences.	Van Assche N, Michels S, Naert I, Quirynen M.	Clin Implant Dent Relat Res	55	999	14	22
22236804	Effects of adding omalizumab, an anti-immunoglobulin E antibody, on airway wall thickening in asthma.	Hoshino M, Ohtawa J.	Respiration	55.2	20	30	10
22236918	Tuberculosis case finding for vaccine trials in young children in high-incidence settings: a randomised trial.	Moyo S, Verver S, Hawkridge A, Geiter L, Hatherill M, Workman L, Ontong C, Msemburi W, Tameris M, Geldenhuys H, Mulenga H, Snowden MA, Hanekom WA, Hussey G, Mahomed H; South African Tuberculosis Vaccine Initiative Neonatal Study Team.	Int J Tuberc Lung Dis	999	0	4763	1
22237061	Efficacy and safety of a short course of very-high-dose cholecalciferol in hemodialysis.	Wasse H, Huang R, Long Q, Singapuri S, Raggi P, Tangpricha V.	Am J Clin Nutr	50.5	999	52	21
22237064	Weight-loss diets modify glucose-dependent insulinotropic polypeptide receptor rs2287019 genotype effects on changes in body weight, fasting glucose, and insulin resistance: the Preventing Overweight Using Novel Dietary Strategies trial.	Qi Q, Bray GA, Hu FB, Sacks FM, Qi L.	Am J Clin Nutr	51	30	737	4
22237243	Outcomes of arteriovenous fistula for hemodialysis in Sudanese patients: single-center e-perience.	Ahmed GM, Mansour MO, Elfatih M, Khalid KE, Ahmed Mel I.	Saudi J Kidney Dis Transpl	43.9	999	73	20
22237855	Probabilistic classification and gambling in patients with schizophrenia receiving medication: comparison of risperidone, olanzapine, clozapine and typical antipsychotics.	Wasserman JI, Barry RJ, Bradford L, Delva NJ, Beninger RJ.	Psychopharmacology (Berl)	41.8	999	151	5
22237870	Bifidobacterium lactis Bb12 enhances intestinal antibody response in formula-fed infants: a randomized, double-blind, controlled trial.	Holscher HD, Czerkies LA, Cekola P, Litov R, Benbow M, Santema S, Ale-ander DD, Perez V, Sun S, Saavedra JM, Tappenden KA.	JPEN J Parenter Enteral Nutr	999	0	145	16
22238339	A two-year observational study assessing the safety of DepoFoam bupivacaine after augmentation mammaplasty.	Minkowitz HS, Onel E, Patronella CK, Smoot JD.	Aesthet Surg J	31.5	999	94	21
22238398	Comparative effects of variations in duodenal glucose load on glycemic, insulinemic, and incretin responses in healthy young and older subjects.	Trahair LG, Horowitz M, Rayner CK, Gentilcore D, Lange K, Wishart JM, Jones KL.	J Clin Endocrinol Metab	45.5	999	24	4
22238574	A randomized controlled trial of adjunctive family therapy and treatment as usual following inpatient treatment for anore-ia nervosa adolescents.	Godart N, Berthoz S, Curt F, Perdereau F, Rein Z, Wallier J, Horreard AS, Kaganski I, Lucet R, Atger F, Corcos M, Fermanian J, Falissard B, Flament M, Eisler I, Jeammet P.	PLoS One	16.6	13	60	5
22240281	Effect of acupuncture on perception threshold: a randomised controlled trial.	Wu S, Yamaguchi H, Shibutani K.	Acupunct Med	29.3	999	98	6
22240782	Triplets versus doublets, with or without cisplatin, in the first-line treatment of stage IIIB-IV non-small cell lung cancer (NSCLC) patients: a multicenter randomised factorial trial (FAST).	Boni C, Tiseo M, Boni L, Baldini E, Recchia F, Barone C, Grossi F, Germano D, Matano E, Marini G, Labianca R, Di Costanzo F, Bagnulo A, Pennucci C, Caroti C, Mencoboni M, Zanelli F, Prochilo T, Cafferata MA, Ardizzoni A; Gruppo Oncologico Italiano di Ricerca Clinica (GOIRC).	Br J Cancer	63.5	18	433	2
22240839	Impact of concomitant antacid administration on gabapentin plasma e-posure and oral bioavailability in healthy adult subjects.	Yagi T, Naito T, Mino Y, Umemura K, Kawakami J.	Drug Metab Pharmacokinet	26	999	13	6
22241513	Esomeprazole for the treatment of GERD in infants ages 1-11 months.	Winter H, Gunasekaran T, Tolia V, Gottrand F, Barker PN, Illueca M.	J Pediatr Gastroenterol Nutr	0.4	0.1	98	11
22241704	Efficacy of constraint-induced therapy on functional performance and health-related quality of life for children with cerebral palsy: a randomized controlled trial.	Hsin YJ, Chen FC, Lin KC, Kang LJ, Chen CL, Chen CY.	J Child Neurol	6.9	6	22	6
22241923	Combination therapy with low-dose transpupillary thermotherapy and intravitreal ranibizumab for neovascular age-related macular degeneration: a 24-month prospective randomised clinical study.	Soderberg AC, Algvere PV, Hengstler JC, Soderberg P, Seregard S, Kvanta A.	Br J Ophthalmol	79	50	92	7
22242558	Differences in treatment outcome among marijuana-dependent young adults with and without antisocial personality disorder.	Easton CJ, Oberleitner LM, Scott MC, Crowley MJ, Babuscio TA, Carroll KM.	Am J Drug Alcohol Abuse	21.2	18	136	5
22242678	Critical temperature threshold measurement for cold urticaria: a randomized controlled trial of H(1) -antihistamine dose escalation.	Magerl M, Pisarevskaja D, Staubach P, Martus P, Church MK, Maurer M.	Br J Dermatol	999	999	25	12
22243774	A randomized phase II trial of S-1-o-aliplatin versus capecitabine-o-aliplatin in advanced gastric cancer.	Kim GM, Jeung HC, Rha SY, Kim HS, Jung I, Nam BH, Lee KH, Chung HC.	Eur J Cancer	60.5	999	129	2
22246217	Physical activity increases bone mineral density in children with type 1 diabetes.	Maggio AB, Rizzoli RR, Marchand LM, Ferrari S, Beghetti M, Farpour-Lambert NJ.	Med Sci Sports E-erc	10.5	999	59	13
22247354	Safety and efficacy of various dosages of ocrelizumab in Japanese patients with rheumatoid arthritis with an inadequate response to methotre-ate therapy: a placebo-controlled double-blind parallel-group study.	Harigai M, Tanaka Y, Maisawa S; JA21963 Study Group.	J Rheumatol	54	20	151	13
22248392	Targeted treatment of invasive fungal infections accelerates healing of foot wounds in patients with Type 2 diabetes.	Chellan G, Neethu K, Varma AK, Mangalanandan TS, Shashikala S, Dinesh KR, Sundaram KR, Varma N, Jayakumar RV, Bal A, Kumar H.	Diabet Med	59.1	18	75	4
22248495	Effects of fed- versus fasted-state aerobic training during Ramadan on body composition and some metabolic parameters in physically active men.	Trabelsi K, el Abed K, Stannard SR, Jammoussi K, Zeghal KM, Hakim A.	Int J Sport Nutr E-erc Metab	999	999	19	4
22248497	A comparative analysis between the effects of galactose and glucose supplementation on endurance performance.	Macdermid PW, Stannard S, Rankin D, Shillington D.	Int J Sport Nutr Exerc Metab	30	999	8	5
22248659	Effect of IL28B genotype on early viral kinetics during interferon-free treatment of patients with chronic hepatitis C.	Chu TW, Kulkarni R, Gane EJ, Roberts SK, Stedman C, Angus PW, Ritchie B, Lu -Y, Ipe D, Lopatin U, Germer S, Iglesias VA, Elston R, Smith PF, Shulman NS.	Gastroenterology	999	999	83	1
22249480	Hemodynamic responses and upper airway morbidity following tracheal intubation in patients with hypertension: conventional laryngoscopy versus an intubating laryngeal mask airway.	Sener EB, Ustun E, Ustun B, Sarihasan B.	Clinics (Sao Paulo)	54.8	18	42	10
22251379	Can an old dog learn (and want to e-perience) new tricks? Cognitive training increases openness to e-perience in older adults.	Jackson JJ, Hill PL, Payne BR, Roberts BW, Stine-Morrow EA.	Psychol Aging	72.9	999	183	5
22251436	Maraviroc, a chemokine receptor-5 antagonist, fails to demonstrate efficacy in the treatment of patients with rheumatoid arthritis in a randomized, double-blind placebo-controlled trial.	Fleishaker DL, Garcia Meijide JA, Petrov A, Kohen MD, Wang -, Menon S, Stock TC, Mebus CA, Goodrich JM, Mayer HB, Zeiher BG.	Arthritis Res Ther	53.8	18	126	13
22251482	A phase 2 study of the safety, tolerability, and pharmacodynamics of FBS0701, a novel oral iron chelator, in transfusional iron overload.	Neufeld EJ, Galanello R, Viprakasit V, Aydinok Y, Piga A, Harmatz P, Forni GL, Shah FT, Grace RF, Porter JB, Wood JC, Peppe J, Jones A, Rienhoff HY Jr.	Blood	28.5	18	51	3
22252217	Effect of atorvastatin on erectile functions in comparison with regular tadalafil use. A prospective single-blind study.	Gokce MÄ°, GulpÄ±nar Ã?, Ã?zturk E, Gulec S, Yaman Ã?.	Int Urol Nephrol	56.1	30	120	14
22252528	Impact of a work-focused intervention on the productivity and symptoms of employees with depression.	Lerner D, Adler D, Hermann RC, Chang H, Ludman EJ, Greenhill A, Perch K, McPeck WC, Rogers WH.	J Occup Environ Med	45.6	18	79	5
22252927	Phase 2 results from Radiation Therapy Oncology Group Study 0537: a phase 2/3 study comparing acupuncture-like transcutaneous electrical nerve stimulation versus pilocarpine in treating early radiation-induced -erostomia.	Wong RK, James JL, Sagar S, Wyatt G, Nguyen-TÃ¢n PF, Singh AK, Lukaszczyk B, Cardinale F, Yeh AM, Berk L.	Cancer	60	999	47	2
22253054	Comparison of conventional continuous positive airway pressure to continuous positive airway pressure titration performed with sleep endoscopy.	Civelek S, Emre IE, Dizdar D, Cuhadaroglu C, Eksioglu BK, Eraslan AK, Turgut S.	Laryngoscope	52.7	999	16	6
22258265	Effect of supplementation with cholecalciferol and calcium on 2-y bone mass accrual in HIV-infected children and adolescents: a randomized clinical trial.	Arpadi SM, McMahon DJ, Abrams EJ, Bamji M, Purswani M, Engelson ES, Horlick M, Shane E.	Am J Clin Nutr	10.6	6	59	1
22258708	Persistence of immunogenicity of a monovalent influenza virus A/H1N1 2009 vaccine in healthy volunteers.	Lai YC, Yang KC, Hsieh SM, Yao CA, Lee LT, Huang KC.	Clin Vaccine Immunol	50.2	18	218	1
22259064	Acute sleep deprivation enhances the brain's response to hedonic food stimuli: an fMRI study.	Benedict C, Brooks SJ, O'Daly OG, AlmÃ¨n MS, Morell A, Ã?berg K, Gingnell M, Schultes B, Hallschmid M, Broman JE, Larsson EM, Schioth HB.	J Clin Endocrinol Metab	23.3	999	12	5
22260307	Anterior suspension combined with posterior reconstruction during robot-assisted laparoscopic prostatectomy improves early return of urinary continence: a prospective randomized multicentre trial.	Hurtes -, RouprÃªt M, Vaessen C, Pereira H, Faivre d'Arcier B, Cormier L, BruyÃ¨re F.	BJU Int	62.4	999	72	14
22260359	Does alcohol consumption really affect asymmetry perception? A three-armed placebo-controlled e-perimental study.	Halsey LG, Huber JW, Hardwick JC.	Addiction	999	999	101	22
22260837	The eradicating Helicobacter pylori infection in duodenal ulcer patients by three short-term triple therapies in China: a multicenter clinical comparative study.	Dai WQ, Zhou YQ, -u L, Wang BF, Fan -M, Wu JY, Wang CY, -u -F, Guo CY.	Hepatogastroenterology	37	15	116	11
22260946	Should women receive left ventricular assist device support?: findings from INTERMACS.	Hsich EM, Naftel DC, Myers SL, Gorodeski EZ, Grady KL, Schmuhl D, Ulisney KL, Young JB.	Circ Heart Fail	53.5	999	1936	9
22260988	Immunogenicity and tolerability of a multicomponent meningococcal serogroup B (4CMenB) vaccine in healthy adolescents in Chile: a phase 2b/3 randomised, observer-blind, placebo-controlled study.	Santolaya ME, O'Ryan ML, Valenzuela MT, Prado V, Vergara R, MuÃ±oz A, Toneatto D, GraÃ±a G, Wang H, Clemens R, Dull PM; V72P10 Meningococcal B Adolescent Vaccine Study group.	Lancet	13.8	11	1631	1
22261578	Effect of conjugated linoleic acid supplementation on weight loss and body fat composition in a Chinese population.	Chen SC, Lin YH, Huang HP, Hsu WL, Houng JY, Huang CK.	Nutrition	32.8	18	63	4
22261780	Comparison of 3-segmentation techniques for intraventricular and intracerebral hemorrhages in unenhanced computed tomography scans.	KN BP, Hu J, Morgan TC, Hanley D, Nowinski WL.	J Comput Assist Tomogr	999	999	41	6
22265697	Neoadjuvant anastrozole versus tamo-ifen in patients receiving goserelin for premenopausal breast cancer (STAGE): a double-blind, randomised phase 3 trial.	Masuda N, Sagara Y, Kinoshita T, Iwata H, Nakamura S, Yanagita Y, Nishimura R, Iwase H, Kamigaki S, Takei H, Noguchi S.	Lancet Oncol	999	20	197	2
22266087	Unplugged": a school-based randomized control trial to prevent and reduce adolescent substance use in the Czech Republic."	Gabrhelik R, Duncan A, Miovsky M, Furr-Holden CD, Stastna L, Jurystova L.	Drug Alcohol Depend	11.5	999	1871	5
22267280	Distinct effects of pioglitazone and metformin on circulating sclerostin and biochemical markers of bone turnover in men with type 2 diabetes mellitus.	van Lierop AH, Hamdy NA, van der Meer RW, Jonker JT, Lamb HJ, Rijzewijk LJ, Diamant M, Romijn JA, Smit JW, Papapoulos SE.	Eur J Endocrinol	56	45	101	4
22267768	Efficacy, safety and effect on biomarkers of AZD9668 in cystic fibrosis.	Elborn JS, Perrett J, Forsman-Semb K, Marks-Konczalik J, Gunawardena K, Entwistle N.	Eur Respir J	28	16	56	4
22268183	Comparative investigation of i.v. iohe-ol and iopamidol: effect on renal function in low-risk outpatients undergoing CT.	Dillman JR, al-Hawary M, Ellis JH, Cohan RH, Kaza R, Myles JD, Khalatbari S, Francis IR.	AJR Am J Roentgenol	56.4	18	389	14
22268727	Pain difference associated with injection of abobotulinumto-inA reconstituted with preserved saline and preservative-free saline: a prospective, randomized, side-by-side, double-blind study.	Allen SB, Goldenberg NA.	Dermatol Surg	999	21	20	12
22269473	Treatment of uterine myoma with 5 or 10mg mifepristone daily during 6 months, post-treatment evolution over 12 months: double-blind randomised clinical trial.	Esteve JL, Acosta R, Perez Y, Campos R, HernÃ¡ndez AV, Te-idÃ³ CS.	Eur J Obstet Gynecol Reprod Biol	41.2	18	176	14
22269509	Distraction and pedestrian safety: how talking on the phone, te-ting, and listening to music impact crossing the street.	Schwebel DC, Stavrinos D, Byington KW, Davis T, O'Neal EE, de Jong D.	Accid Anal Prev	20.9	17	138	19
22269899	Influence of parenteral nutrition delivery system on the development of bloodstream infections in critically ill patients: an international, multicenter, prospective, open-label, controlled study--EPICOS study.	Pontes-Arruda A, Dos Santos MC, Martins LF, GonzÃ¡lez ER, Kliger RG, Maia M, Magnan GB; EPICOS Study Group.	JPEN J Parenter Enteral Nutr	40.2	6	613	1
22269987	The impact of a workplace-based weight loss program on work-related outcomes in overweight male shift workers.	Morgan PJ, Collins CE, Plotnikoff RC, Cook AT, Berthon B, Mitchell S, Callister R.	J Occup Environ Med	44.4	18	110	4
22270734	Fluoroscopic cervical interlaminar epidural injections in managing chronic pain of cervical postsurgery syndrome: preliminary results of a randomized, double-blind, active control trial.	Manchikanti L, Malla Y, Cash KA, McManus CD, Pampati V.	Pain Physician	48.7	18	56	6
22272247	Impairments of social motor coordination in schizophrenia.	Varlet M, Marin L, Raffard S, Schmidt RC, Capdevielle D, Boulenger JP, Del-Monte J, Bardy BG.	PLoS One	30.5	999	80	5
22272945	Influence of different types of mouthguards on strength and performance of collegiate athletes: a controlled-randomized trial.	Duddy FA, Weissman J, Lee RA Sr, Paranjpe A, Johnson JD, Cohenca N.	Dent Traumatol	999	999	18	22
22273498	Effects of a long-pulsed 800-nm diode laser on a-illary hyperhidrosis: a randomized controlled half-side comparison study.	Bechara FG, Georgas D, Sand M, Stucker M, Othlinghaus N, Altmeyer P, Gambichler T.	Dermatol Surg	39	18	21	12
22273828	Comparison of the antiemetic effect of ramosetron and combined ramosetron and midazolam in children: a double-blind, randomised clinical trial.	Byon HJ, Lee SJ, Kim JT, Kim HS.	Eur J Anaesthesiol	6.1	4	405	7
22275153	The effect of rectal distension on bladder function in patients with overactive bladder.	Akl MN, Jacob K, Klauschie J, Crowell MD, Kho RM, Cornella JL.	Neurourol Urodyn	67	999	26	14
22275399	Higher antigen content improves the immune response to 2009 H1N1 influenza vaccine in HIV-infected adults: a randomized clinical trial.	El Sahly HM, Davis C, Kotloff K, Meier J, Winokur PL, Wald A, Johnston C, George SL, Brady RC, Lehmann C, Stokes-Riner A, Keitel WA.	J Infect Dis	45.5	18	192	1
22275471	Effects of GH in women with abdominal adiposity: a 6-month randomized, double-blind, placebo-controlled trial.	Bredella MA, Lin E, Brick DJ, Gerweck AV, Harrington LM, Torriani M, Thomas BJ, Schoenfeld DA, Breggia A, Rosen CJ, Hemphill LC, Wu Z, Rifai N, Utz AL, Miller KK.	Eur J Endocrinol	35.9	18	79	4
22278377	A randomized phase-II trial comparing sequential and concurrent paclita-el with oral or parenteral fluorinated pyrimidines for advanced or metastatic gastric cancer.	Nishikawa K, Morita S, Matsui T, Kobayashi M, Takeuchi Y, Takahashi I, Sato S, Miyashita Y, Tsuburaya A, Sakamoto J, Kakeji Y, Baba H.	Gastric Cancer	67.2	20	157	2
22279526	Behavioral priming: it's all in the mind, but whose mind?	Doyen S, Klein O, Pichon CL, Cleeremans A.	PLoS One	21.6	999	170	5
22280547	Allergenic immunotherapy and seasonal changes in nitric o-ide concentration in e-haled air in seasonal rhinitis patients.	Å?wiebocka EM, Siergiejko P, Rapiejko P, Siergiejko Z.	J Aerosol Med Pulm Drug Deliv	15.1	999	41	10
22280855	A randomized prospective trial to assess the impact of transurethral resection in narrow band imaging modality on non-muscle-invasive bladder cancer recurrence.	Naselli A, Introini C, Timossi L, Spina B, Fontana V, Pezzi R, Germinale F, Bertolotto F, Puppo P.	Eur Urol	71.2	999	188	2
22282770	Can supervised group e-ercises including ergonomic advice reduce the prevalence and severity of low back pain and pelvic girdle pain in pregnancy? A randomized controlled trial.	Eggen MH, Stuge B, Mowinckel P, Jensen KS, Hagen KB.	Phys Ther	30.3	18	257	13
22284287	A randomized, placebo-controlled clinical trial on the effects of recombinant human rela-in on tooth movement and short-term stability.	McGorray SP, Dolce C, Kramer S, Stewart D, Wheeler TT.	Am J Orthod Dentofacial Orthop	26.9	999	39	22
22284296	Physical properties of root cementum: part 23. Effects of 2 or 3 weekly reactivated continuous or intermittent orthodontic forces on root resorption and tooth movement: a microcomputed tomography study.	Aras B, Cheng LL, Turk T, Elekdag-Turk S, Jones AS, Darendeliler MA.	Am J Orthod Dentofacial Orthop	14.4	999	32	22
22286548	Effect of aliskiren on proteinuria in non-diabetic chronic kidney disease: a double-blind, crossover, randomised, controlled trial.	Lizakowski S, Tylicki L, Renke M, Rutkowski P, Heleniak Z, SÅ?awiÅ?ska-Morawska M, Aleksandrowicz E, Lysiak-SzydÅ?owska W, Rutkowski B.	Int Urol Nephrol	39	18	14	14
22288883	Effect of normal saline irrigation on attenuation of shoulder tip pain and on Î²-endorphin levels after laparoscopic cholecystectomy.	Seo YK, Lee HJ, Ha TK, Lee KG.	J Laparoendosc Adv Surg Tech A	47.9	20	50	11
22288913	The use of cone-beam computed tomography and virtual reality simulation for pre-surgical practice in endodontic microsurgery.	Suebnukarn S, Rhienmora P, Haddawy P.	Int Endod J	999	999	10	21
22289235	Full kinetic chain manual and manipulative therapy plus e-ercise compared with targeted manual and manipulative therapy plus e-ercise for symptomatic osteoarthritis of the hip: a randomized controlled trial.	Brantingham JW, Parkin-Smith G, Cassa TK, Globe GA, Globe D, Pollard H, deLuca K, Jensen M, Mayer S, Korporaal C.	Arch Phys Med Rehabil	63	40	111	13
22289903	Preoperative intraaortic balloon pump for off-pump coronary arterial revascularization.	Mannacio V, Di Tommaso L, De Amicis V, Stassano P, Musumeci F, Vosa C.	Ann Thorac Surg	64.4	999	230	9
22289904	De-amethasone pretreatment provides antiinflammatory and myocardial protection in neonatal arterial switch operation.	Heying R, Wehage E, Schumacher K, Tassani P, Haas F, Lange R, Hess J, Seghaye MC.	Ann Thorac Surg	0	999	20	16
22290206	Efficacy and tolerability of ziprasidone vs. olanzapine in naive first-episode schizophrenia: a 6-week, randomized, open-label, fle-ible-dose study.	Li YM, Zhao JP, Ou JJ, Wu RR.	Pharmacopsychiatry	24.7	18	88	5
22290281	Randomized clinical trial of antibiotics in acute uncomplicated diverticulitis.	Chabok A, PÃ¥hlman L, Hjern F, Haapaniemi S, Smedh K; AVOD Study Group.	Br J Surg	57.3	18	623	11
22292014	Grasp it loudly! Supporting actions with semantically congruent spoken action words.	Fargier R, Menoret M, Boulenger V, Nazir TA, Paulignan Y.	PLoS One	24	999	39	5
22292152	Use of platelet-rich fibrin membrane following treatment of gingival recession: a randomized clinical trial.	Jankovic S, Aleksic Z, Klokkevold P, Lekovic V, Dimitrijevic B, Kenney EB, Camargo P.	Int J Periodontics Restorative Dent	999	999	15	22
22292153	Immediate loading of mandibular dental implants in partially edentulous patients: a prospective randomized comparative study.	Margossian P, Mariani P, Stephan G, Margerit J, Jorgensen C.	Int J Periodontics Restorative Dent	999	18	117	22
22292521	Long-term effects of treatment and response in patients with chronic hepatitis C on quality of life. An international, multicenter, randomized, controlled study.	Bezemer G, Van Gool AR, Verheij-Hart E, Hansen BE, Lurie Y, Esteban JI, Lagging M, Negro F, Zeuzem S, Ferrari C, Pawlotsky JM, Neumann AU, Schalm SW, de Knegt RJ; DITTO-HCV Study Group.	BMC Gastroenterol	999	999	270	1
22293584	Administration of highly purified eicosapentaenoic acid to statin-treated diabetic patients further improves vascular function.	Sasaki J, Miwa T, Odawara M.	Endocr J	67.3	999	28	4
22293719	Continuous femoral nerve blocks: decreasing local anesthetic concentration to minimize quadriceps femoris weakness.	Bauer M, Wang L, Onibonoje OK, Parrett C, Sessler DI, Mounir-Soliman L, Zaky S, Krebs V, Buller LT, Donohue MC, Stevens-Lapsley JE, Ilfeld BM.	Anesthesiology	60	18	36	6
22294470	Midostaurin does not prolong cardiac repolarization defined in a thorough electrocardiogram trial in healthy volunteers.	del Corral A, Dutrei- C, Huntsman-Labed A, Lorenzo S, Morganroth J, Harrell R, Wang Y.	Cancer Chemother Pharmacol	999	18	192	2
22296076	Ulipristal acetate versus leuprolide acetate for uterine fibroids.	Donnez J, Tomaszewski J, VÃ¡zquez F, Bouchard P, Lemieszczuk B, BarÃ³ F, Nouri K, Selvaggi L, Sodowski K, Bestel E, Terrill P, Osterloh I, Loumaye E; PEARL II Study Group.	N Engl J Med	40.4	18	301	14
22296077	GAD65 antigen therapy in recently diagnosed type 1 diabetes mellitus.	Ludvigsson J, Krisky D, Casas R, Battelino T, CastaÃ±o L, Greening J, Kordonouri O, Otonkoski T, Pozzilli P, Robert JJ, Veeze HJ, Palmer J, Samuelsson U, Elding Larsson H, Ã?man J, KÃ¤rdell G, Neiderud Helsingborg J, Lundstrom G, Albinsson E, Carlsson A, Nordvall M, Fors H, et al.	N Engl J Med	13	10	334	4
22296168	Beer Ã no-go: learning to stop responding to alcohol cues reduces alcohol intake via reduced affective associations rather than increased response inhibition.	Houben K, Havermans RC, Nederkoorn C, Jansen A.	Addiction	20.9	999	57	5
22297104	Pulsed radiofrequency electromagnetic field therapy: a potential novel treatment of plantar fasciitis.	Brook J, Dauphinee DM, Korpinen J, Rawe IM.	J Foot Ankle Surg	51.8	999	70	13
22297311	Nonmedication smoking reduction program for inpatients with chronic schizophrenia: a randomized control design study.	Gelkopf M, Noam S, Rudinski D, Lerner A, Behrbalk P, Bleich A, Melamed Y.	J Nerv Ment Dis	46.3	18	53	5
22297610	The interaction between the location of lower e-tremity muscle fatigue and visual condition on unipedal postural stability.	Soleimanifar M, Salavati M, Akhbari B, Moghadam M.	Eur J Appl Physiol	22.5	999	25	6
22297687	Clinical decision support to promote safe prescribing to women of reproductive age: a cluster-randomized trial.	Schwarz EB, Parisi SM, Handler SM, Koren G, Cohen ED, Shevchik GJ, Fischer GS.	J Gen Intern Med	34	18	12676	21
22297706	Alternative model of birth to reduce the risk of assisted vaginal delivery and perineal trauma.	Walker C, RodrÃ­guez T, Herranz A, Espinosa JA, SÃ¡nchez E, EspuÃ±a-Pons M.	Int Urogynecol J	30.4	999	196	15
22298019	Chronic protection against ischemia and reperfusion-induced endothelial dysfunction during therapy with different organic nitrates.	Lisi M, Oelze M, Dragoni S, Liuni A, Steven S, Luca MC, Stalleicken D, Munzel T, Laghi-Pasini F, Daiber A, Parker JD, Gori T.	Clin Res Cardiol	999	999	30	9
22298804	Fat content in liver and skeletal muscle changes in a reciprocal manner in patients with acromegaly during combination therapy with a somatostatin analog and a GH receptor antagonist: a randomized clinical trial.	Madsen M, Krusenstjerna-HafstrÃ¸m T, MÃ¸ller L, Christensen B, Vendelbo MH, Pedersen SB, Frystyk J, Jessen N, Hansen TK, StÃ¸dkilde-JÃ¸rgensen H, Flyvbjerg A, JÃ¸rgensen JO.	J Clin Endocrinol Metab	54	999	18	4
22298950	Randomized Phase III evaluation of the efficacy and safety of a novel glycopyrrolate oral solution for the management of chronic severe drooling in children with cerebral palsy or other neurologic conditions.	Zeller RS, Lee HM, Cavanaugh PF, Davidson J.	Ther Clin Risk Manag	9.5	3	36	6
22299761	A randomized, placebo-controlled study to assess the efficacy of lateral branch neurotomy for chronic sacroiliac joint pain.	Patel N, Gross A, Brown L, Gekht G.	Pain Med	58.7	18	51	6
22300693	Ursodeo-ycholic acid in patients with chronic heart failure: a double-blind, randomized, placebo-controlled, crossover trial.	von Haehling S, Schefold JC, Jankowska EA, Springer J, Vazir A, Kalra PR, Sandek A, Fauler G, Stojakovic T, Trauner M, Ponikowski P, Volk HD, Doehner W, Coats AJ, Poole-Wilson PA, Anker SD.	J Am Coll Cardiol	65.8	18	17	9
22301417	Nevirapine pharmacokinetics and risk of rash and hepatitis among HIV-infected sub-Saharan African women.	Dong BJ, Zheng Y, Hughes MD, Frymoyer A, Verotta D, Lizak P, Sawe F, Currier JS, Lockman S, Aweeka FT; AIDS Clinical Trials Group Study 5208 Team.	AIDS	33	999	359	1
22301476	Immunogenicity, safety and reactogenicity of a mammalian cell-culture-derived influenza vaccine in healthy children and adolescents three to seventeen years of age.	Vesikari T, Block SL, Guerra F, Lattanzi M, Holmes S, Izu A, Gaitatzis N, Hilbert AK, Groth N.	Pediatr Infect Dis J	999	3	3604	1
22301525	NIDCAP improves brain function and structure in preterm infants with severe intrauterine growth restriction.	Als H, Duffy FH, McAnulty G, Butler SC, Lightbody L, Kosta S, Weisenfeld NI, Robertson R, Parad RB, Ringer SA, Blickman JG, Zurakowski D, Warfield SK.	J Perinatol	0	999	30	16
22302182	Effect of caffeine on adenosine-induced reversible perfusion defects assessed by automated analysis.	Lee JC, Fraser JF, Barnett AG, Johnson LP, Wilson MG, McHenry CM, Walters DL, Warnholtz CR, Khafagi FA.	J Nucl Cardiol	70	999	30	9
22302530	Vitamin E effect on controlled ovarian stimulation of une-plained infertile women.	Cicek N, Eryilmaz OG, Sarikaya E, Gulerman C, Genc Y.	J Assist Reprod Genet	25.8	999	103	14
22302719	Effect of letrozole on uterine artery Doppler flow indices prior to first-trimester termination of pregnancy: a randomized controlled trial.	Lee VC, Yeung TW, Tang OS, Ng EH, Yeung WS, Ho PC.	Ultrasound Obstet Gynecol	34	18	30	15
22306046	Lack of an effect of Lactobacillus reuteri DSM 17938 in preventing nosocomial diarrhea in children: a randomized, double-blind, placebo-controlled trial.	Wanke M, Szajewska H.	J Pediatr	0.9	0.1	106	1
22306121	HORIZON: an open-label e-tension trial of ranibizumab for choroidal neovascularization secondary to age-related macular degeneration.	Singer MA, Awh CC, Sadda S, Freeman WR, Antoszyk AN, Wong P, Tuomi L.	Ophthalmology	76.4	999	853	7
22306962	Effect of acute e-ercise on e-ecutive function in children with attention deficit hyperactivity disorder.	Chang YK, Liu S, Yu HH, Lee YH.	Arch Clin Neuropsychol	10.4	8	40	5
22308241	Cognitive and graded activity training can alleviate persistent fatigue after stroke: a randomized, controlled trial.	Zedlitz AM, Rietveld TC, Geurts AC, Fasotti L.	Stroke	55.2	18	83	6
22309432	Tricyclic antidepressant poisoning treated by magnesium sulfate: a randomized, clinical trial.	Emamhadi M, Mostafazadeh B, Hassanijirdehi M.	Drug Chem To-icol	32.9	999	72	19
22309470	Enhancing the effectiveness of juvenile drug courts by integrating evidence-based practices.	Henggeler SW, McCart MR, Cunningham PB, Chapman JE.	J Consult Clin Psychol	15.4	12	104	5
22309507	Clonidine does not improve quality of ropivacaine a-illary brachial ple-us block in children.	Trifa M, Ben Khalifa S, Jendoubi A, Zribi N, Regaya T, Engelhardt T.	Paediatr Anaesth	3.5	1	60	6
22310097	Accuracy of robot-assisted placement of lumbar and sacral pedicle screws: a prospective randomized comparison to conventional freehand screw implantation.	Ringel F, Stuer C, Reinke A, Preuss A, Behr M, Auer F, Stoffel M, Meyer B.	Spine (Phila Pa 1976)	67.5	18	298	6
22310472	Effect of protein intake and weight gain velocity on body fat mass at 6 months of age: the EU Childhood Obesity Programme.	Escribano J, Luque V, Ferre N, Mendez-Riera G, Koletzko B, Grote V, Demmelmair H, Bluck L, Wright A, Closa-Monasterolo R; European Childhood Obesity Trial Study Group.	Int J Obes (Lond)	0.1	0	66	16
22311939	Weight loss and improvements in fatigue in systemic lupus erythematosus: a controlled trial of a low glycaemic inde- diet versus a calorie restricted diet in patients treated with corticosteroids.	Davies RJ, Lomer MC, Yeo SI, Avloniti K, Sangle SR, D'Cruz DP.	Lupus	46	18	23	12
22311960	Randomized controlled trial evaluation of a tailored leaflet and SMS te-t message self-help intervention for pregnant smokers (MiQuit).	Naughton F, Prevost AT, Gilbert H, Sutton S.	Nicotine Tob Res	26.8	16	207	5
22311988	Early childhood family intervention and long-term obesity prevention among high-risk minority youth.	Brotman LM, Dawson-McClure S, Huang KY, Theise R, Kamboukos D, Wang J, Petkova E, Ogedegbe G.	Pediatrics	4.3	4	595	5
22313287	Acupuncture compared with oral antihistamine for type I hypersensitivity itch and skin response in adults with atopic dermatitis: a patient- and e-aminer-blinded, randomized, placebo-controlled, crossover trial.	Pfab F, Kirchner MT, Huss-Marp J, Schuster T, Schalock PC, Fuqin J, Athanasiadis GI, Behrendt H, Ring J, Darsow U, Napadow V.	Allergy	23.3	18	20	5
22313605	The effect of a fictitious peer on young children's choice of familiar v. unfamiliar low- and high-energy-dense foods.	Bevelander KE, Anschutz DJ, Engels RC.	Br J Nutr	7.1	999	316	5
22314814	Subcutaneous allergen-specific immunotherapy versus topical treatment in vernal keratoconjunctivitis.	Mahdy RA, Nada WM, Marei AA.	Cornea	13.6	999	64	7
22316443	Antenatal thyroid screening and childhood cognitive function.	Lazarus JH, Bestwick JP, Channon S, Paradice R, Maina A, Rees R, Chiusano E, John R, Guaraldo V, George LM, Perona M, Dall'Amico D, Parkes AB, Joomun M, Wald NJ.	N Engl J Med	0	0	794	4
22316445	Tai chi and postural stability in patients with Parkinson's disease.	Li F, Harmer P, Fitzgerald K, Eckstrom E, Stock R, Galver J, Maddalozzo G, Batya SS.	N Engl J Med	68.7	40	195	6
22322165	Higher-order aberrations after corneal collagen crosslinking for keratoconus and corneal ectasia.	Greenstein SA, Fry KL, Hersh MJ, Hersh PS.	J Cataract Refract Surg	999	14	73	7
22323092	Activated partial thromboplastin time measurement is not associated with clinical outcomes in patients with high-risk non-ST-segment elevation acute coronary syndromes treated with unfractionated heparin.	Thomas MP, Mahaffey KW, Chiswell K, Cohen M, Kontos MC, Antman EM, Ferguson JJ, Califf RM, Goodman SG, Becker RC.	J Thromb Thrombolysis	68	999	9978	9
22323351	Effect of an 8-weeks aerobic training program in elderly on o-idative stress and HSP72 e-pression in leukocytes during antio-idant supplementation.	Simar D, Malatesta D, Mas E, Delage M, Caillaud C.	J Nutr Health Aging	74.6	999	16	5
22323626	Task-dependent changes in cortical e-citability and effective connectivity: a combined TMS-EEG study.	Johnson JS, Kundu B, Casali AG, Postle BR.	J Neurophysiol	21.9	999	16	6
22324058	Whole-body vibration in addition to strength and balance e-ercise for falls-related functional mobility of frail older adults: a single-blind randomized controlled trial.	Pollock RD, Martin FC, Newham DJ.	Clin Rehabil	81.1	999	77	13
22324488	Azithromycin as an adjunctive treatment of generalized severe chronic periodontitis: clinical, microbiologic, and biochemical parameters.	Han B, Emingil G, Ã?zdemir G, Tervahartiala T, Vural C, Atilla G, Baylas H, Sorsa T.	J Periodontol	45.8	999	28	11
22324753	Long-term effects of three multicomponent e-ercise interventions on physical performance and fall-related psychological outcomes in community-dwelling older adults: a randomized controlled trial.	Freiberger E, HÃ¤berle L, Spirduso WW, Zijlstra GA.	J Am Geriatr Soc	76.1	70	280	13
22325157	Broccoli sprouts powder could improve serum triglyceride and o-idized LDL/LDL-cholesterol ratio in type 2 diabetic patients: a randomized double-blind placebo-controlled clinical trial.	Bahadoran Z, Mirmiran P, Hosseinpanah F, Rajab A, Asghari G, Azizi F.	Diabetes Res Clin Pract	52.3	18	72	4
22326237	Long-term safety and tolerability of rotigotine transdermal system in patients with early-stage idiopathic Parkinson's disease: a prospective, open-label e-tension study.	Elmer LW, Surmann E, Boroojerdi B, Jankovic J.	Parkinsonism Relat Disord	63.2	30	216	6
22326435	Adalimumab induces and maintains mucosal healing in patients with Crohn's disease: data from the E-TEND trial.	Rutgeerts P, Van Assche G, Sandborn WJ, Wolf DC, Geboes K, Colombel JF, Reinisch W; E-TEND Investigators, Kumar A, Lazar A, Camez A, Loma- KG, Pollack PF, D'Haens G.	Gastroenterology	37.1	18	129	11
22326977	Efficacy and safety of intravenous sodium valproate versus phenobarbital in controlling convulsive status epilepticus and acute prolonged convulsive seizures in children: a randomised trial.	Malamiri RA, Ghaempanah M, Khosroshahi N, Nikkhah A, Bavarian B, Ashrafi MR.	Eur J Paediatr Neurol	4.5	2	60	6
22327082	Long-term effects of whole-body vibration training in high-level female basketball players.	Fernandez-Rio J, Terrados N, Suman O.	J Sports Med Phys Fitness	23.6	999	10	13
22327404	Infusion of a lipid emulsion in healthy men decreases the serotonergic response.	Sondermeijer BM, Klein Twennaar CF, Kastelein JJ, Franssen EJ, Hutten BA, Dallinga-Thie GM, Stroes ES, Fliers E, Twickler MT, Serlie MJ.	Neuroendocrinology	23.6	999	10	4
22330010	Randomized sham-controlled trial of acupuncture for postoperative pain control after stapled haemorrhoidope-y.	Langenbach MR, Aydemir-Dogruyol K, Issel R, Sauerland S.	Colorectal Dis	55.7	999	50	9
22330975	Operative versus nonoperative treatment of unstable lateral malleolar fractures: a randomized multicenter trial.	Sanders DW, Tieszer C, Corbett B; Canadian Orthopedic Trauma Society.	J Orthop Trauma	41	999	81	13
22331336	Hemodynamic effects of delayed cord clamping in premature infants.	Sommers R, Stonestreet BS, Oh W, Laptook A, Yanowitz TD, Raker C, Mercer J.	Pediatrics	0	0	51	16
22332671	Photodynamic therapy can improve warts' discomfort in renal transplant patients prospective multicenter study.	Sparsa A, Blaise S, Tack B, Dalmay F, Leroy D, Bonnetblanc JM, Beani JC, Bedane C.	Photochem Photobiol	52.3	999	20	12
22333698	Immunogenicity of a single dose of meningococcal group C conjugate vaccine given at 3 months of age to healthy infants in the United kingdom.	Findlow H, Borrow R, Andrews N, Waight P, Sheasby E, Matheson M, England A, Goldblatt D, Ashton L, Findlow J, Miller E.	Pediatr Infect Dis J	0.2	0.1	146	1
22333882	Pelvic e-amination skills training with genital teaching associates and a pelvic simulator: does sequence matter?	Seago BL, Ketchum JM, Willett RM.	Simul Healthc	24.5	999	168	14
22334121	Dose-related modulation of event-related potentials to novel and target stimuli by intravenous Î?â¹-THC in humans.	D'Souza DC, Fridberg DJ, Skosnik PD, Williams A, Roach B, Singh N, Carbuto M, Elander J, Schnakenberg A, Pittman B, Sewell RA, Ranganathan M, Mathalon D.	Neuropsychopharmacology	25.9	18	26	5
22336189	Intracoronary cardiosphere-derived cells for heart regeneration after myocardial infarction (CADUCEUS): a prospective, randomised phase 1 trial.	Makkar RR, Smith RR, Cheng K, Malliaras K, Thomson LE, Berman D, Czer LS, MarbÃ¡n L, Mendizabal A, Johnston PV, Russell SD, Schuleri KH, Lardo AC, Gerstenblith G, MarbÃ¡n E.	Lancet	53	18	25	9
22336473	Cilostazol versus aspirin therapy in patients with chronic dizziness after ischemic stroke.	Johkura K, Yoshida TN, Kudo Y, Nakae Y, Momoo T, Kuroiwa Y.	Clin Neurol Neurosurg	75.2	999	106	6
22336631	Caffeine increases tear volume depending on polymorphisms within the adenosine A2a receptor gene and cytochrome P450 1A2.	Arita R, Yanagi Y, Honda N, Maeda S, Maeda K, Kuchiba A, Yamaguchi T, Yanagihara Y, Suzuki H, Amano S.	Ophthalmology	33.6	999	78	7
22337343	Attention focus, trait an-iety and pain perception in patients undergoing colposcopy.	Kola S, Walsh JC, Hughes BM, Howard S.	Eur J Pain	30.4	18	123	14
22337508	A randomized controlled trial of IPT versus CBT in primary care: with some cautionary notes about handling missing values in clinical trials.	Power MJ, Freeman C.	Clin Psychol Psychother	36.1	18	157	5
22337582	Se- differences in analgesic response to ibuprofen are influenced by e-pectancy: a randomized, crossover, balanced placebo-designed study.	Butcher BE, Carmody JJ.	Eur J Pain	28.8	18	20	18
22337714	E-cess mortality after treatment with fludarabine and cyclophosphamide in combination with alemtuzumab in previously untreated patients with chronic lymphocytic leukemia in a randomized phase 3 trial.	Lepretre S, Aurran T, Mahe B, Cazin B, Tournilhac O, Maisonneuve H, Casasnovas O, Delmer A, Leblond V, Royer B, Corront B, Chevret S, Delepine R, Vaudau- S, Van Den Neste E, Bene MC, Letestu R, Cymbalista F, Feugier P.	Blood	57	18	165	2
22337760	The influence of mean arterial blood pressure during cardiopulmonary bypass on postoperative renal dysfunction in elderly patients.	Sirvinskas E, Benetis R, Raliene L, Andrejaitiene J.	Perfusion	74.9	70	122	9
22338070	Amino acid absorption and subsequent muscle protein accretion following graded intakes of whey protein in elderly men.	Pennings B, Groen B, de Lange A, Gijsen AP, Zorenc AH, Senden JM, van Loon LJ.	Am J Physiol Endocrinol Metab	73	999	33	4
22338103	Effect of e-tended-release niacin on new-onset diabetes among hyperlipidemic patients treated with ezetimibe/simvastatin in a randomized controlled trial.	Guyton JR, Fazio S, Adewale AJ, Jensen E, Tomassini JE, Shah A, Tershakovec AM.	Diabetes Care	56.9	18	1220	4
22339101	Hegu acupuncture for chronic low-back pain: a randomized controlled trial.	Yun M, Shao Y, Zhang Y, He S, -iong N, Zhang J, Guo M, Liu D, Luo Y, Guo L, Yan J.	J Altern Complement Med	34	20	187	13
22339102	Effects of noninvasive electroacupuncture at Hegu (LI4) and Sanyinjiao (SP6) acupoints on dysmenorrhea: a randomized controlled trial.	Wu LL, Su CH, Liu CF.	J Altern Complement Med	27	999	66	14
22339573	The safety of an adenosine A(1)-receptor antagonist, rolofylline, in patients with acute heart failure and renal impairment: findings from PROTECT.	Teerlink JR, Iragui VJ, Mohr JP, Carson PE, Hauptman PJ, Lovett DH, Miller AB, PiÃ±a IL, Thomson S, Varosy PD, Zile MR, Cleland JG, Givertz MM, Metra M, Ponikowski P, Voors AA, Davison BA, Cotter G, Wolko D, Delucca P, Salerno CM, Mansoor GA, et al.	Drug Saf	70.2	18	2033	9
22339945	Evaluation of zirconium-o-ide-based ceramic single-unit posterior fi-ed dental prostheses (FDPs) generated with two CAD/CAM systems compared to porcelain-fused-to-metal single-unit posterior FDPs: a 5-year clinical prospective study.	Vigolo P, Mutinelli S.	J Prosthodont	32	999	60	22
22340303	The use of digital photographs for the diagnosis of hand osteoarthritis: the AGES-Reykjavik study.	Jonsson H, Helgadottir GP, Aspelund T, Sverrisdottir JE, Eiriksdottir G, Sigurdsson S, Eliasson GJ, Jonsson A, Ingvarsson T, Harris TB, Launer L, Gudnason V.	BMC Musculoskelet Disord	76	999	381	13
22340476	E-tracorporeal shock wave treatment for non-inflammatory chronic pelvic pain syndrome: a prospective, randomized and sham-controlled study.	Zeng -Y, Liang C, Ye ZQ.	Chin Med J (Engl)	47.5	18	80	11
22340928	Efficacy and safety of de-amethasone ointment on recurrent aphthous ulceration.	Liu C, Zhou Z, Liu G, Wang Q, Chen J, Wang L, Zhou Y, Dong G, -u -, Wang Y, Guo Y, Lin M, Wu L, Du G, Wei C, Zeng -, Wang -, Wu J, Li B, Zhou G, Zhou H.	Am J Med	32	18	240	11
22341379	Neural tissue management provides immediate clinically relevant benefits without harmful effects for patients with nerve-related neck and arm pain: a randomised trial.	Nee RJ, Vicenzino B, Jull GA, Cleland JA, Coppieters MW.	J Physiother	47	18	60	6
22341868	Apolipoprotein B-48 as a determinant of endothelial function in obese subjects with type 2 diabetes mellitus: effect of fenofibrate treatment.	Chan DC, Wong AT, Yamashita S, Watts GF.	Atherosclerosis	59.4	40	62	9
22341914	Effect of head and body position on intraocular pressure.	Malihi M, Sit AJ.	Ophthalmology	28.6	999	24	7
22342390	Effects of coenzyme Q10 supplementation on inflammatory markers (high-sensitivity C-reactive protein, interleukin-6, and homocysteine) in patients with coronary artery disease.	Lee BJ, Huang YC, Chen SJ, Lin PT.	Nutrition	77.2	999	40	9
22342408	Narrow band imaging cystoscopy and bipolar plasma vaporization for large nonmuscle-invasive bladder tumors--results of a prospective, randomized comparison to the standard approach.	Geavlete B, Multescu R, Georgescu D, Stanescu F, Jecu M, Geavlete P.	Urology	64.1	999	220	2
22343419	Silybin combined with phosphatidylcholine and vitamin E in patients with nonalcoholic fatty liver disease: a randomized controlled trial.	Loguercio C, Andreone P, Brisc C, Brisc MC, Bugianesi E, Chiaramonte M, Cursaro C, Danila M, de Sio I, Floreani A, Freni MA, Grieco A, Groppo M, Lazzari R, Lobello S, Lorefice E, Margotti M, Miele L, Milani S, Okolicsanyi L, Palasciano G, Portincasa P, et al.	Free Radic Biol Med	45.2	18	138	11
22343689	Comparative efficacy of different doses of fibrin sealant to reduce bleeding after total knee arthroplasty.	Notarnicola A, Moretti L, Martucci A, Spinarelli A, Tafuri S, Pesce V, Moretti B.	Blood Coagul Fibrinolysis	69.2	55	90	13
22343992	Atorvastatin in clinically-significant macular edema in diabetics with a normal lipid profile.	Narang S, Sood S, Kaur B, Singh R, Mallik A, Kaur J.	Nepal J Ophthalmol	58.2	999	30	7
22344189	Comparison of trabeculectomy and E--PRESS implantation in fellow eyes of the same patient: a prospective, randomised study.	Dahan E, Ben Simon GJ, Lafuma A.	Eye (Lond)	65.4	18	15	7
22347697	A prospective randomized, double-blind, controlled clinical trial comparing epidural butorphanol plus corticosteroid with corticosteroid alone for sciatica due to herniated nucleus pulposus.	Maity A, Mondal BC, Saha D, Roy DS.	Perspect Clin Res	37.5	18	120	13
22348112	A randomized controlled trial of a personalized feedback intervention for problem gamblers.	Cunningham JA, Hodgins DC, Toneatto T, Murphy M.	PLoS One	46.6	18	209	5
22348270	Response to albuterol MDI delivered through an anti-static chamber during nocturnal bronchospasm.	Prabhakaran S, Shuster J, Chesrown S, Hendeles L.	Respir Care	25	999	7	10
22348319	A prospective, comparative trial of standard and breath-actuated nebulizer: efficacy, safety, and satisfaction.	Arunthari V, Bruinsma RS, Lee AS, Johnson MM.	Respir Care	69	18	28	10
22348468	Effects of high-dose fish oil supplementation during early infancy on neurodevelopment and language: a randomised controlled trial.	Meldrum SJ, D'Vaz N, Simmer K, Dunstan JA, Hird K, Prescott SL.	Br J Nutr	0	0	420	5
22349209	Acute effects of a caffeine-taurine energy drink on repeated sprint performance of American college football players.	Gwacham N, Wagner DR.	Int J Sport Nutr E-erc Metab	19.7	999	20	5
22349746	IV paracetamol effect on propofol-ketamine consumption in paediatric patients undergoing ESWL.	Eker HE, Cok OY, ErgenoÄ?lu P, AriboÄ?an A, Arslan G.	J Anesth	3.7	1	60	14
22350110	Vitamin D reduces musculoskeletal pain after infusion of zoledronic acid for postmenopausal osteoporosis.	Catalano A, Morabito N, Atteritano M, Basile G, Cucinotta D, Lasco A.	Calcif Tissue Int	64.2	999	60	13
22350244	Laparoscopic common bile duct e-ploration versus open surgery: comparative prospective randomized trial.	Grubnik VV, Tkachenko AI, Ilyashenko VV, Vorotyntseva KO.	Surg Endosc	62.5	999	256	11
22351696	Responsiveness of intrinsic subtypes to adjuvant anthracycline substitution in the NCIC.CTG MA.5 randomized trial.	Cheang MC, Voduc KD, Tu D, Jiang S, Leung S, Chia SK, Shepherd LE, Levine MN, Pritchard KI, Davies S, Stijleman IJ, Davis C, Ebbert MT, Parker JS, Ellis MJ, Bernard PS, Perou CM, Nielsen TO.	Clin Cancer Res	999	999	716	2
22351892	Impaired fetal growth and arterial wall thickening: a randomized trial of Ï?-3 supplementation.	Skilton MR, Ayer JG, Harmer JA, Webb K, Leeder SR, Marks GB, Celermajer DS.	Pediatrics	0	0	363	9
22353593	Neonatal outcomes after influenza immunization during pregnancy: a randomized controlled trial.	Steinhoff MC, Omer SB, Roy E, El Arifeen S, Raqib R, Dodd C, Breiman RF, Zaman K.	CMAJ	0	0	327	1
22353759	Neurobehavioral effects of interferon-Î± in patients with hepatitis-C: symptom dimensions and responsiveness to paro-etine.	McNutt MD, Liu S, Manatunga A, Royster EB, Raison CL, Woolwine BJ, Demetrashvili MF, Miller AH, Musselman DL.	Neuropsychopharmacology	48.7	999	61	1
22356267	Selenomethionine treatment in patients with autoimmune thyroiditis: a prospective, quasi-randomised trial.	Anastasilakis AD, Toulis KA, Nisianakis P, Goulis DG, Kampas L, Valeri RM, Oikonomou D, Tzellos TG, Delaroudis S.	Int J Clin Pract	43.7	18	86	4
22356350	Bioavailability and disposition of azelastine and fluticasone propionate when delivered by MP29-02, a novel aqueous nasal spray.	Derendorf H, Munzel U, Petzold U, Maus J, Mascher H, Hermann R, Bousquet J.	Br J Clin Pharmacol	30.6	18	60	10
22357185	Safety and efficacy of once-weekly e-enatide compared with insulin glargine titrated to target in patients with type 2 diabetes over 84 weeks.	Diamant M, Van Gaal L, Stranks S, Guerci B, MacConell L, Haber H, Scism-Bacon J, Trautmann M.	Diabetes Care	58	999	456	4
22357633	Differential effects of power training versus functional task practice on compensation and restoration of arm function after stroke.	Corti M, McGuirk TE, Wu SS, Patten C.	Neurorehabil Neural Repair	59.8	999	14	6
22360575	Treatment of acute bronchitis with EPs 7630: randomized, controlled trial in children and adolescents.	Kamin W, Ilyenko LI, Malek FA, Kieser M.	Pediatr Int	8.9	1	220	10
22361918	Landiolol, an ultra-short-acting Î²â?-blocker, more effectively terminates atrial fibrillation than diltiazem after open heart surgery: prospective, multicenter, randomized, open-label study (JL-KNIGHT study).	Sakamoto A, Kitakaze M, Takamoto S, Namiki A, Kasanuki H, Hosoda S; JL-KNIGHT study group.	Circ J	69.7	20	71	9
22362401	Reactive hyperemia is not responsible for stimulating muscle protein synthesis following blood flow restriction exercise.	Gundermann DM, Fry CS, Dickinson JM, Walker DK, Timmerman KL, Drummond MJ, Volpi E, Rasmussen BB.	J Appl Physiol	24	999	6	5
22363556	A randomly-controlled study on the cardiac function at the early stage of return to the plains after short-term e-posure to high altitude.	Zhou Q, Yang S, Luo Y, Qi Y, Yan Z, Shi Z, Fan Y.	PLoS One	21.8	18	96	9
22366535	Effects of subthalamic nucleus deep brain stimulation and L-DOPA on blinking in Parkinson's disease.	Bologna M, Fasano A, Modugno N, Fabbrini G, Berardelli A.	E-p Neurol	63.4	999	16	6
22367417	Combination of citalopram plus paliperidone is better than citalopram alone in the treatment of somatoform disorder: results of a 6-week randomized study.	Huang M, Luo B, Hu J, Wei N, Chen L, Wang S, Zhou W, Hu S, -u Y.	Int Clin Psychopharmacol	44.4	18	60	5
22367751	Initial e-perience from a double-blind, placebo-controlled, clinical outcome study of ARC1779 in patients with thrombotic thrombocytopenic purpura.	Cataland SR, Peyvandi F, Mannucci PM, LÃ¤mmle B, Kremer Hovinga JA, Machin SJ, Scully M, Rock G, Gilbert JC, Yang S, Wu H, Jilma B, Knoebl P.	Am J Hematol	41.5	999	9	3
22369176	Randomized controlled study of a cosmetic treatment for mild acne.	Capitanio B, Sinagra JL, Weller RB, Brown C, Berardesca E.	Clin E-p Dermatol	18.1	999	60	12
22369287	Efficacy and tolerability of vildagliptin as add-on therapy to metformin in Chinese patients with type 2 diabetes mellitus.	Pan C, -ing -, Han P, Zheng S, Ma J, Liu J, Lv -, Lu J, Bader G; Institution Investigators.	Diabetes Obes Metab	54.1	18	438	4
22369682	Randomised clinical trial: high-dose vs. standard-dose proton pump inhibitors for the prevention of recurrent haemorrhage after combined endoscopic haemostasis of bleeding peptic ulcers.	Chen CC, Lee JY, Fang YJ, Hsu SJ, Han ML, Tseng PH, Liou JM, Hu FC, Lin TL, Wu MS, Wang HP, Lin JT.	Aliment Pharmacol Ther	65.2	16	201	11
22370739	The new oral adenosine A1 receptor agonist capadenoson in male patients with stable angina.	Tendera M, Gaszewska-Å»urek E, Parma Z, Ponikowski P, Jankowska E, Kawecka-Jaszcz K, Czarnecka D, KrzemiÅ?ska-PakuÅ?a M, Bednarkiewicz Z, Sosnowski M, Ochan Kilama M, Agrawal R.	Clin Res Cardiol	59.4	40	62	9
22371350	Perinatal mortality and adverse pregnancy outcomes in a low-income rural population of women who smoke.	McElroy JA, Bloom T, Moore K, Geden B, Everett K, Bullock LF.	Birth Defects Res A Clin Mol Teratol	999	18	298	15
22371836	Prosthetic aspects and patient satisfaction with resilient liner and clip attachments for bar- and implant-retained mandibular overdentures: a 3-year randomized clinical study.	ELsyad MA.	Int J Prosthodont	62.5	999	30	22
22373886	Effect of a lifestyle intervention on adiposity and fitness in socially disadvantaged subgroups of preschoolers: a cluster-randomized trial (Ballabeina).	Burgi F, Niederer I, Schindler C, Bodenmann P, Marques-Vidal P, Kriemler S, Puder JJ.	Prev Med	5.2	999	652	5
22374703	Impact of crooked nose rhinoplasty on observer perceptions of attractiveness.	Ro-bury C, Ishii M, Godoy A, Papel I, Byrne PJ, Boahene KD, Ishii LE.	Laryngoscope	29.5	999	39	22
22374759	Pomegranate juice and punicalagin attenuate o-idative stress and apoptosis in human placenta and in human placental trophoblasts.	Chen B, Tuuli MG, Longtine MS, Shin JS, Lawrence R, Inder T, Michael Nelson D.	Am J Physiol Endocrinol Metab	999	999	20	15
22375571	E-ploring and reducing stress in young restaurant workers: results of a randomized field trial.	Petree RD, Broome KM, Bennett JB.	Am J Health Promot	22	16	947	5
22376791	Rest versus e-ercise as treatment for patients with low back pain and Modic changes. A randomized controlled clinical trial.	Jensen RK, Leboeuf-Yde C, Wedderkopp N, Sorensen JS, Manniche C.	BMC Med	46	18	100	13
22377512	A randomized, placebo- and active-controlled study of paliperidone e-tended-release as maintenance treatment in patients with bipolar I disorder after an acute manic or mi-ed episode.	Berwaerts J, Melkote R, Nuamah I, Lim P.	J Affect Disord	40	18	1122	5
22377796	Two-year randomized, placebo-controlled study of black currant anthocyanins on visual field in glaucoma.	Ohguro H, Ohguro I, Katai M, Tanaka S.	Ophthalmologica	61.8	999	40	7
22377840	Value of high frequency ultrasonography in diagnosis and surgical repair of traumatic finger tendon ruptures.	Zhang GY, Zhuang HY, Wang L-.	Med Princ Pract	32.6	18	92	13
22378918	Lithium lacks effect on survival in amyotrophic lateral sclerosis: a phase IIb randomised sequential trial.	Verstraete E, Veldink JH, Huisman MH, Draak T, Uijtendaal EV, van der Kooi AJ, Schelhaas HJ, de Visser M, van der Tweel I, van den Berg LH.	J Neurol Neurosurg Psychiatry	59.2	18	133	6
22379071	Early antibiotic treatment for Pseudomonas aeruginosa eradication in patients with cystic fibrosis: a randomised multicentre study comparing two different protocols.	Taccetti G, Bianchini E, Cariani L, Buzzetti R, Costantini D, Trevisan F, Zavataro L, Campana S; Italian Group for P aeruginosa Eradication in Cystic Fibrosis.	Thora-	7.6	1	223	10
22381428	The clinical impact of incomplete left atrial appendage closure with the Watchman Device in patients with atrial fibrillation: a PROTECT AF (Percutaneous Closure of the Left Atrial Appendage Versus Warfarin Therapy for Prevention of Stroke in Patients With Atrial Fibrillation) substudy.	Viles-Gonzalez JF, Kar S, Douglas P, Dukkipati S, Feldman T, Horton R, Holmes D, Reddy VY.	J Am Coll Cardiol	72	999	419	9
22381899	Prospective preference assessment of patients' willingness to participate in a randomized controlled trial of intensity-modulated radiotherapy versus proton therapy for localized prostate cancer.	Shah A, Efstathiou JA, Paly JJ, Halpern SD, Bruner DW, Christodouleas JP, Coen JJ, Deville C Jr, Vapiwala N, Shipley WU, Zietman AL, Hahn SM, Bekelman JE.	Int J Radiat Oncol Biol Phys	65	18	46	2
22382793	A randomized double-blind study comparing intradermal anesthetic tolerability, efficacy, and cost-effectiveness of lidocaine, buffered lidocaine, and bacteriostatic normal saline for peripheral intravenous insertion.	Ganter-Ritz V, Speroni KG, Atherton M.	J Infus Nurs	47.7	18	256	18
22383605	Effect of a procedural video CD and study guide on the practical fi-ed prosthodontic performance of Iranian dental students.	Nikzad S, Azari A, Mahgoli H, Akhoundi N.	J Dent Educ	999	999	70	22
22385366	Immunological effects and tolerability of a new fast updosed immunologically enhanced subcutaneous immunotherapy formulation with optimized allerge-djuvant ratio.	Pfaar O, Jung K, Wolf H, Decot E, Kleine-Tebbe J, Klimek L, Wustenberg E.	Allergy	36.5	18	400	10
22386009	The impact on self-efficacy of different types of follow-up care and disease status in patients with rheumatoid arthritis--a randomized trial.	Primdahl J, Wagner L, Holst R, HÃ¸rslev-Petersen K; AMBRA Study Group.	Patient Educ Couns	61.1	999	200	13
22387713	Fasting for 24 h improves nasal chemosensory performance and food palatability in a related manner.	Cameron JD, Goldfield GS, Doucet Ã?.	Appetite	28.6	18	15	4
22389136	Randomized clinical trial comparing infrahepatic inferior vena cava clamping with low central venous pressure in comple- liver resections involving the Pringle manoeuvre.	Zhu P, Lau WY, Chen YF, Zhang B-, Huang ZY, Zhang ZW, Zhang W, Dou L, Chen -P.	Br J Surg	999	999	192	2
22389307	Results of AIEOP LNH-97 protocol for the treatment of anaplastic large cell lymphoma of childhood.	Pillon M, Gregucci F, Lombardi A, Santoro N, Piglione M, Sala A, D'Amore ES, De Santis R, Casale F, Zecca M, Mussolin L, Rosolen A; NHL-Committee of the Italian Association of Pediatric Hematology and Oncology (AIEOP).	Pediatr Blood Cancer	10	18	32	2
22391671	Parker Fle--Tip TubeÂ® provides higher intubation success with the Penta--AWS AirwayscopeÂ® despite the AWS tip being inserted into the vallecula.	Suzuki A, Ohmura T, Tampo A, Goto Y, Oikawa O, Kunisawa T, Iwasaki H.	J Anesth	59.5	18	40	22
22392326	Double-blind randomized controlled trial of rolls fortified with microencapsulated iron.	Barbosa TN, Taddei JA, Palma D, Ancona-Lopez F, Braga JA.	Rev Assoc Med Bras	999	2	324	3
22392354	Desarda versus Lichtenstein technique for primary inguinal hernia treatment: 3-year results of a randomized clinical trial.	Szopinski J, Dabrowiecki S, Pierscinski S, Jackowski M, Jaworski M, Szuflet Z.	World J Surg	50.6	999	208	11
22392934	The effect of neoadjuvant chemoradiotherapy on airway colonization and postoperative respiratory complications in patients undergoing oesophagectomy for oesophageal cancer.	Bagheri R, RajabiMashhadi MT, Ghazvini K, Asnaashari A, Zahediyan A, Sahebi MA.	Interact Cardiovasc Thorac Surg	61	999	40	2
22394412	Intravenous diuretic and vasodilator therapy reduce plasma brain natriuretic peptide levels in acute e-acerbation of chronic obstructive pulmonary disease.	Zhang J, Zhao G, Yu -, Pan -.	Respirology	66.4	999	60	10
22395273	A comparison of assisted and unassisted proprioceptive neuromuscular facilitation techniques and static stretching.	Maddigan ME, Peach AA, Behm DG.	J Strength Cond Res	24.1	999	13	13
22395731	Dopamine modulates reward system activity during subconscious processing of se-ual stimuli.	Oei NY, Rombouts SA, Soeter RP, van Gerven JM, Both S.	Neuropsychopharmacology	22.7	999	53	6
22395923	Glasgow supported self-management trial (GSuST) for patients with moderate to severe COPD: randomised controlled trial.	Bucknall CE, Miller G, Lloyd SM, Cleland J, McCluskey S, Cotton M, Stevenson RD, Cotton P, McConnachie A.	BMJ	69.1	999	464	10
22396514	Early surgical therapy for drug-resistant temporal lobe epilepsy: a randomized trial.	Engel J Jr, McDermott MP, Wiebe S, Langfitt JT, Stern JM, Dewar S, Sperling MR, Gardiner I, Erba G, Fried I, Jacobs M, Vinters HV, Mintzer S, Kieburtz K; Early Randomized Surgical Epilepsy Trial (ERSET) Study Group.	JAMA	33.5	12	38	6
22398262	The beneficial effects of adding low level laser to ultrasound and e-ercise in Iranian women with shoulder tendonitis: a randomized clinical trial.	Otadi K, Hadian MR, Olyaei G, Jalaie S.	J Back Musculoskelet Rehabil	48.8	999	42	13
22399019	Depression does not affect the treatment outcome of CBT for panic and agoraphobia: results from a multicenter randomized trial.	Emmrich A, Beesdo-Baum K, Gloster AT, Knappe S, Hofler M, Arolt V, Deckert J, Gerlach AL, Hamm A, Kircher T, Lang T, Richter J, Strohle A, Zwanzger P, Wittchen HU.	Psychother Psychosom	35.5	999	369	5
22401479	The effect of sertraline add-on to brief dynamic psychotherapy for the treatment of postpartum depression: a randomized, double-blind, placebo-controlled study.	Bloch M, Meiboom H, Lorberblatt M, Bluvstein I, Aharonov I, Schreiber S.	J Clin Psychiatry	999	18	42	5
22401952	Ketamine-propofol combination (ketofol) versus propofol alone for emergency department procedural sedation and analgesia: a randomized double-blind trial.	Andolfatto G, Abu-Laban RB, Zed PJ, Staniforth SM, Stackhouse S, Moadebi S, Willman E.	Ann Emerg Med	51	14	284	22
22402793	Availability of a 5% lidocaine patch used prophylactically for venipuncture- or injection-related pain in children.	Kim CH, Yoon JU, Lee HJ, Shin SW, Yoon JY, Byeon GJ.	J Anesth	9.1	4	72	22
22402864	Pento-ifylline as a rescue treatment for DMD: a randomized double-blind clinical trial.	Escolar DM, Zimmerman A, Bertorini T, Clemens PR, Connolly AM, Mesa L, Gorni K, Kornberg A, Kolski H, Kuntz N, Nevo Y, Tesi-Rocha C, Nagaraju K, Rayavarapu S, Hache LP, Mayhew JE, Florence J, Hu F, Arrieta A, Henricson E, Leshner RT, Mah JK.	Neurology	10.1	4	62	6
22403308	No evidence for spread of Plasmodium falciparum artemisinin resistance to Savannakhet Province, Southern Laos.	May-ay M, Khanthavong M, Chanthongthip O, Imwong M, Lee SJ, Stepniewska K, Soonthornsata B, Pongvongsa T, Phompida S, Hongvanthong B, Ringwald P, White NJ, Newton PN.	Am J Trop Med Hyg	28	10	44	1
22404114	Light levels of anaesthesia after rela-ation for tracheal intubation - comparison of succinylcholine and cis-atracurium.	Linstedt U, Haecker KG, Prengel AW.	Acta Anaesthesiol Scand	46	999	65	22
22404145	Carvedilol inhibits the cardiostimulant and thermogenic effects of MDMA in humans.	Hysek C, Schmid Y, Rickli A, Simmler LD, Donzelli M, Grouzmann E, Liechti ME.	Br J Pharmacol	24.2	18	16	19
22404194	The effectiveness of integrated care for patients with hand eczema: results of a randomized, controlled trial.	van Gils RF, Boot CR, Knol DL, Rustemeyer T, van Mechelen W, van der Valk PG, Anema JR.	Contact Dermatitis	43.2	16	196	12
22404704	A randomised, placebo-controlled 52-week trial of continued quetiapine treatment in recently depressed patients with bipolar I and bipolar II disorder.	Young AH, McElroy SL, Olausson B, Paulsson B.	World J Biol Psychiatry	40.1	18	584	5
22406028	Supraglottic jet ventilation in difficult airway management.	Peng J, Ye J, Zhao Y, Liang J, Huang H, Wei H, Peng S.	J Emerg Med	33	18	71	22
22407057	Three-hour interval drain clamping reduces postoperative bleeding in total knee arthroplasty: a prospective randomized controlled trial.	Pornrattanamaneewong C, Narkbunnam R, Siriwattanasakul P, Chareancholvanich K.	Arch Orthop Trauma Surg	68.9	999	100	13
22407618	PDT in non-surgical treatment of periodontitis in HIV patients: a split-mouth, randomized clinical trial.	Noro Filho GA, Casarin RC, Casati MZ, Giovani EM.	Lasers Surg Med	44.8	999	12	1
22407658	Psychiatric comorbidity and response to preventative therapy in the treatment of severe migraine trial.	Seng EK, Holroyd KA.	Cephalalgia	37.7	999	177	5
22408124	Pioglitazone increases bone marrow fat in type 2 diabetes: results from a randomized controlled trial.	Grey A, Beckley V, Doyle A, Fenwick S, Horne A, Gamble G, Bolland M.	Eur J Endocrinol	59.9	30	20	4
22409354	Combination laser-assisted liposuction and minimally invasive skin tightening with temperature feedback for treatment of the submentum and neck.	Ale-iades-Armenakas M.	Dermatol Surg	55.2	35	12	12
22409563	Hypotony in patients with uveitis: The Multicenter Uveitis Steroid Treatment (MUST) Trial.	Sen HN, Drye LT, Goldstein DA, Larson TA, Merrill PT, Pavan PR, Sheppard JD, Burke A, Srivastava SK, Jabs DA; Multicenter Uveitis Steroid Treatment (MUST) Trial Research Group.	Ocul Immunol Inflamm	999	999	240	7
22410137	Latent tuberculosis infection treatment for prison inmates: a randomised controlled trial.	Chan PC, Yang CH, Chang LY, Wang KF, Lu BY, Lu CY, Shao PL, Hsueh PR, Fang CT, Huang LM.	Int J Tuberc Lung Dis	999	999	373	1
22411302	Effect of an in-clinic IPV advocate intervention to increase help seeking, reduce violence, and improve well-being.	Coker AL, Smith PH, Whitaker DJ, Le B, Crawford TN, Fler- VC.	Violence Against Women	40.8	18	231	5
22411639	The safety and efficacy of intravenous ketorolac in patients undergoing primary endoscopic sinus surgery: a randomized, double-blinded clinical trial.	Moeller C, Pawlowski J, Pappas AL, Fargo K, Welch K.	Int Forum Allergy Rhinol	42.3	18	34	10
22411849	Erythropoietin in Friedreich ata-ia: no effect on frata-in in a randomized controlled trial.	Mariotti C, Fancellu R, Caldarazzo S, Nanetti L, Di Bella D, Plumari M, Lauria G, Cappellini MD, Duca L, Solari A, Taroni F.	Mov Disord	46.6	25	180	6
22412063	A randomized trial of the efficacy of hand disinfection for prevention of rhinovirus infection.	Turner RB, Fuls JL, Rodgers ND, Goldfarb HB, Lockhart LK, Aust LB.	Clin Infect Dis	21.8	18	212	1
22413874	The MONET trial: week 144 analysis of the efficacy of darunavir/ritonavir (DRV/r) monotherapy versus DRV/r plus two nucleoside reverse transcriptase inhibitors, for patients with viral load < 50 HIV-1 RNA copies/mL at baseline.	Arribas JR, Clumeck N, Nelson M, Hill A, van Delft Y, Moecklinghoff C.	HIV Med	43	999	256	1
22416789	A lifestyle intervention to reduce Type 2 diabetes risk in Dutch primary care: 2.5-year results of a randomized controlled trial.	Vermunt PW, Milder IE, Wielaard F, de Vries JH, Baan CA, van Oers JA, Westert GP.	Diabet Med	999	40	925	4
22417212	Probiotic effects on T-cell maturation in infants during weaning.	West CE, Hernell O, Andersson Y, Sjostedt M, Hammarstrom ML.	Clin E-p Allergy	0.3	0.3	171	3
22419641	Isoniazid vs. rifampin for latent tuberculosis infection in jail inmates: to-icity and adherence.	White MC, Tulsky JP, Lee JR, Chen L, Goldenson J, Spetz J, Kawamura LM.	J Correct Health Care	999	999	360	1
22421420	Cerebral o-ygen saturation measured by near-infrared spectroscopy and jugular venous bulb o-ygen saturation during arthroscopic shoulder surgery in beach chair position under sevoflurane-nitrous o-ide or propofol-remifentanil anesthesia.	Jeong H, Jeong S, Lim HJ, Lee J, Yoo KY.	Anesthesiology	62.6	18	36	13
22421498	Knowledge of quality performance measures associated with endoscopy among gastroenterology trainees and the impact of a web-based intervention.	Thompson JS, Lebwohl B, Syngal S, Kastrinos F.	Gastrointest Endosc	999	999	347	11
22421716	Role of gum chewing on the duration of postoperative ileus following ileostomy closure done for typhoid ileal perforation: a prospective randomized trial.	Marwah S, Singla S, Tinna P.	Saudi J Gastroenterol	38.4	999	100	11
22421734	Neuromuscular electrical stimulation for intensive care unit-acquired weakness: protocol and methodological implications for a randomized, sham-controlled, phase II trial.	Kho ME, Truong AD, Brower RG, Palmer JB, Fan E, Zanni JM, Ciesla ND, Feldman DR, Korupolu R, Needham DM.	Phys Ther	28.5	999	89	10
22421983	Metabolic effects of short-term GLP-1 treatment in insulin resistant heart failure patients.	Nielsen R, Wiggers H, Halbirk M, BÃ¸tker H, Holst JJ, Schmitz O, Frandsen E, Nielsen S, MÃ¸ller N, NÃ¸rrelund H.	E-p Clin Endocrinol Diabetes	60	999	60	9
22422931	T2-T3 sympathectomy versus sympathicotomy for essential palmar hyperhidrosis: comparison of effects on cardio-respiratory function.	Fiorelli A, D'Aponte A, Canonico R, Palladino A, Vicidomini G, Limongelli F, Santini M.	Eur J Cardiothorac Surg	28	18	42	12
22423133	HIV-infected ugandan adults taking antiretroviral therapy with CD4 counts >200 cells/Î¼L who discontinue cotrimo-azole prophyla-is have increased risk of malaria and diarrhea.	Campbell JD, Moore D, Degerman R, Kaharuza F, Were W, Muramuzi E, Odongo G, Wetaka M, Mermin J, Tappero JW.	Clin Infect Dis	42.5	18	836	1
22423611	The implementation of malaria intermittent preventive trialtreatment with sulphado-ine-pyrimethamine in infants reduced all-cause mortality in the district of Kolokani, Mali: results from a cluster randomized control.	Dicko A, Konare M, Traore D, Testa J, Salamon R, Doumbo O, Rogier C.	Malar J	999	999	5882	1
22424015	Five-year follow-up of the Sirolimus-Eluting Stents vs Vascular Brachytherapy for Bare Metal In-Stent Restenosis (SISR) trial.	Alli OO, Teirstein PS, Satler L, Sketch MH Jr, Popma JJ, Mauri L, Wang HP, Schleckser PA, Cohen SA, Holmes DR Jr; SISR Investigators.	Am Heart J	63.1	999	384	9
22424016	Five-year results of the Multicenter Randomized Controlled Open-Label Study of the CYPHER Sirolimus-Eluting Stent in the Treatment of Diabetic Patients with De Novo Native Coronary Artery Lesions (SCORPIUS) study: a German multicenter investigation on the effectiveness of sirolimus-eluting stents in...	Sinning JM, Baumgart D, Werner N, Klauss V, Baer FM, Hartmann F, Dre-ler H, Motz W, Klues H, Voelker W, Pfannebecker T, Stoll HP, Nickenig G; SCORPIUS Study.	Am Heart J	66	999	190	9
22424722	Switching children previously e-posed to nevirapine to nevirapine-based treatment after initial suppression with a protease-inhibitor-based regimen: long-term follow-up of a randomised, open-label trial.	Kuhn L, Coovadia A, Strehlau R, Martens L, Hu CC, Meyers T, Sherman G, Hunt G, Persaud D, Morris L, Tsai WY, Abrams EJ.	Lancet Infect Dis	10.5	5	270	5
22424822	Metformin decreases plasma resistin concentrations in pediatric patients with impaired glucose tolerance: a placebo-controlled randomized clinical trial.	GÃ³mez-DÃ­az RA, Talavera JO, Pool EC, Ortiz-Navarrete FV, SolÃ³rzano-Santos F, MondragÃ³n-GonzÃ¡lez R, Valladares-Salgado A, Cruz M, Aguilar-Salinas CA, Wacher NH.	Metabolism	11.9	4	52	4
22425308	A randomized controlled trial comparing bone mineral density changes of three different ACL reconstruction techniques.	Lui PP, Cheng YY, Yung SH, Hung AS, Chan KM.	Knee	25.1	18	52	13
22429361	Impact of a resistant de-trin on intestinal ecology: how altering the digestive ecosystem with NUTRIOSEÂ®, a soluble fibre with prebiotic properties, may be beneficial for health.	Lefranc-Millot C, Guerin-Deremau- L, Wils D, Neut C, Miller LE, Saniez-Degrave MH.	J Int Med Res	46.3	25	40	4
22429566	Comparing efficacy and side effects of a weekly intramuscular biogeneric/biosimilar interferon beta-1a with Avone- in relapsing remitting multiple sclerosis: a double blind randomized clinical trial.	Nafissi S, Azimi A, Amini-Harandi A, Salami S, shahkarami MA, Heshmat R.	Clin Neurol Neurosurg	33	18	60	6
22429600	Does physical activity counselling enhance the effects of a pedometer-based intervention over the long-term: 12-month findings from the Walking for Wellbeing in the west study.	Fitzsimons CF, Baker G, Gray SR, Nimmo MA, Mutrie N; Scottish Physical Activity Research Collaboration (SPARColl).	BMC Public Health	49	18	79	5
22429766	Non-steroidal anti-inflammatory drug use and the risk of benign prostatic hyperplasia-related outcomes and nocturia in the Prostate, Lung, Colorectal, and Ovarian Cancer Screening Trial.	Sutcliffe S, Grubb Iii RL, Platz EA, Ragard LR, Riley TL, Kazin SS, Hayes RB, Hsing AW, Andriole GL; Urologic Diseases in America Project.	BJU Int	60.8	55	4771	2
22430025	Randomized controlled trial comparing pudendal nerve block under ultrasound and fluoroscopic guidance.	Bellingham GA, Bhatia A, Chan CW, Peng PW.	Reg Anesth Pain Med	999	18	23	6
22430092	Influence of rescrubbing before laparotomy closure on abdominal wound infection after colorectal cancer surgery: results of a multicenter randomized clinical trial.	Ortiz H, Armendariz P, Kreisler E, Garcia-Granero E, Espin-Basany E, Roig JV, MartÃ­n A, Parajo A, Valero G, MartÃ­nez M, Biondo S.	Arch Surg	69.2	18	969	2
22431131	Effect of colesevelam on liver fat quantified by magnetic resonance in nonalcoholic steatohepatitis: a randomized controlled trial.	Le TA, Chen J, Changchien C, Peterson MR, Kono Y, Patton H, Cohen BL, Brenner D, Sirlin C, Loomba R; San Diego Integrated NAFLD Research Consortium (SINC).	Hepatology	47.9	18	50	11
22431901	The effect of rosuvastatin on incident pneumonia: results from the JUPITER trial.	Novack V, MacFadyen J, Malhotra A, Almog Y, Glynn RJ, Ridker PM.	CMAJ	999	50	17802	10
22433193	Procedural and early clinical outcomes of patients with de novo coronary bifurcation lesions treated with the novel Nile PA- dedicated bifurcation polymer-free paclita-el coated stents: results from the prospective, multicentre, non-randomised BIPA- clinical trial.	Costa RA, Abizaid A, Abizaid AS, Garcia del Blanco B, Berland J, Petrov I, Brenot P, van Guens RJ, Royer T, Rubino P, Lesiak M, Fajadet J; BIPA- Investigators.	EuroIntervention	63.4	18	101	9
22433473	Comparison of magnesium status using --ray dispersion analysis following magnesium o-ide and magnesium citrate treatment of healthy subjects.	Shechter M, Saad T, Shechter A, Koren-Morag N, Silver BB, Matetzky S.	Magnes Res	53	999	41	4
22435779	High-intensity e-ercise attenuates postprandial lipaemia and markers of o-idative stress.	Gabriel B, Ratkevicius A, Gray P, Frenneau- MP, Gray SR.	Clin Sci (Lond)	24	999	9	9
22437139	Impact of continuous positive airway pressure treatment on right ventricle performance in patients with obstructive sleep apnoea, assessed by three-dimensional echocardiography.	Oliveira W, Poyares D, Cintra F, Vieira ML, Fischer CH, Moises V, Tufik S, Carvalho A, Campos O.	Sleep Med	52.6	18	106	6
22438520	Vitamin E supplementation and the risk of heart failure in women.	Chae CU, Albert CM, Moorthy MV, Lee IM, Buring JE.	Circ Heart Fail	54.6	45	39815	9
22439657	Enhanced e-pectancies improve movement efficiency in runners.	Stoate I, Wulf G, Lewthwaite R.	J Sports Sci	26.4	999	20	5
22440491	Prasugrel versus tirofiban bolus with or without short post-bolus infusion with or without concomitant prasugrel administration in patients with myocardial infarction undergoing coronary stenting: the FABOLUS PRO (Facilitation through Aggrastat By drOpping or shortening Infusion Line in patients wit...	Valgimigli M, Tebaldi M, Campo G, Gambetti S, Bristot L, Monti M, Parrinello G, Ferrari R; FABOLUS PRO Investigators.	JACC Cardiovasc Interv	67.8	18	100	3
22440819	Frequency and duration of drug-free remission after 1 year of treatment with etanercept versus sulfasalazine in early a-ial spondyloarthritis: 2 year data of the ESTHER trial.	Song IH, Althoff CE, Haibel H, Hermann KG, Poddubnyy D, Listing J, WeiÃ? A, Djacenko S, Burmester GR, Bohl-Buhler M, Freundlich B, Rudwaleit M, Sieper J.	Ann Rheum Dis	999	999	60	13
22441580	Low-frequency electrotherapy for female patients with detrusor underactivity due to neuromuscular deficiency.	-u DF, Zhang S, Wang CZ, Li J, Qu CY, Cui -G, Zhao SJ.	Int Urogynecol J	55	999	102	14
22442733	Interactivity and reward-related neural activation during a serious videogame.	Cole SW, Yoo DJ, Knutson B.	PLoS One	25.3	0	57	6
22443478	Transcatheter aortic-valve replacement for inoperable severe aortic stenosis.	Makkar RR, Fontana GP, Jilaihawi H, Kapadia S, Pichard AD, Douglas PS, Thourani VH, Babaliaros VC, Webb JG, Herrmann HC, Bavaria JE, Kodali S, Brown DL, Bowers B, Dewey TM, Svensson LG, Tuzcu M, Moses JW, Williams MR, Siegel RJ, Akin JJ, Anderson WN, et al.	N Engl J Med	999	999	58	9
22443921	Comparison of manual compression alone versus with hemostatic patch in achieving hemostasis after femoral catheter removal.	Tjiong L, Cyr A, Fo- J.	J Perianesth Nurs	59.5	18	88	9
22445187	Is it a safe practice to administer o-ygen during uncomplicated delivery: a randomized controlled trial?	Nesterenko TH, Acun C, Mohamed MA, Mohamed AN, Karcher D, Larsen J Jr, Aly H.	Early Hum Dev	32	999	56	15
22446638	A randomized clinical trial to identify the optimal antigen and MF59(Â®) adjuvant dose of a monovalent A/H1N1 pandemic influenza vaccine in healthy adult and elderly subjects.	Hatz C, von Sonnenburg F, Casula D, Lattanzi M, Lerou--Roels G.	Vaccine	49.6	18	661	1
22446739	Effect of offering different levels of support and free nicotine replacement therapy via an English national telephone quitline: randomised controlled trial.	Ferguson J, Docherty G, Bauld L, Lewis S, Lorgelly P, Boyd KA, McEwen A, Coleman T.	BMJ	38	16	2591	21
22447888	Intracoronary abci-imab and aspiration thrombectomy in patients with large anterior myocardial infarction: the INFUSE-AMI randomized trial.	Stone GW, Maehara A, Witzenbichler B, Godlewski J, Parise H, Dambrink JH, Ochala A, Carlton TW, Cristea E, Wolff SD, Brener SJ, Chowdhary S, El-Omar M, Neunteufl T, Metzger DC, Karwoski T, Dizon JM, Mehran R, Gibson CM; INFUSE-AMI Investigators.	JAMA	60.1	18	452	9
22448110	Laparoendoscopic single-site surgery (LESS) versus conventional laparoscopic surgery for adne-al preservation: a randomized controlled study.	Cho YJ, Kim ML, Lee SY, Lee HS, Kim JM, Joo KY.	Int J Womens Health	30.3	18	63	14
22448738	Efficacy and safety of avanafil for treating erectile dysfunction: results of a multicentre, randomized, double-blind, placebo-controlled trial.	Zhao C, Kim SW, Yang DY, Kim JJ, Park NC, Lee SW, Paick JS, Ahn TY, Moon KH, Chung WS, Min KS, Suh JK, Hyun JS, Park K, Park JK.	BJU Int	55.8	20	200	14
22449251	Randomised clinical trial: the benefit of combination therapy with adefovir and lamivudine for chronic hepatitis B.	Ghany MG, Feld JJ, Zhao -, Heller T, Doo E, Rotman Y, Nagabhyru P, Koh C, Kleiner DE, Wright EC, Liang TJ, Hoofnagle JH.	Aliment Pharmacol Ther	45.5	999	41	1
22450428	Effect of aliskiren treatment on endothelium-dependent vasodilation and aortic stiffness in essential hypertensive patients.	Virdis A, Ghiadoni L, Qasem AA, Lorenzini G, Duranti E, Cartoni G, Bruno RM, Bernini G, Taddei S.	Eur Heart J	45	999	75	9
22452413	Effects of hypothermia on NSE and S-100 protein levels in CSF in neonates following hypo-ic/ischaemic brain damage.	Sun J, Li J, Cheng G, Sha B, Zhou W.	Acta Paediatr	0	0	51	16
22454006	Efficacy of ethinylestradiol 20 Î¼g/drospirenone 3 mg in a fle-ible e-tended regimen in women with moderate-to-severe primary dysmenorrhoea: an open-label, multicentre, randomised, controlled study.	Strowitzki T, Kirsch B, Elliesen J.	J Fam Plann Reprod Health Care	25.5	18	223	14
22454414	Randomized, double-blind, placebo-controlled phase III trial comparing doceta-el and prednisone with or without bevacizumab in men with metastatic castration-resistant prostate cancer: CALGB 90401.	Kelly WK, Halabi S, Carducci M, George D, Mahoney JF, Stadler WM, Morris M, Kantoff P, Monk JP, Kaplan E, Vogelzang NJ, Small EJ.	J Clin Oncol	69	999	1050	2
22455412	Brodalumab, an anti-interleukin-17-receptor antibody for psoriasis.	Papp KA, Leonardi C, Menter A, Ortonne JP, Krueger JG, Kricorian G, Aras G, Li J, Russell CB, Thompson EH, Baumgartner S.	N Engl J Med	42.4	18	198	12
22456591	Effect of video self-observations vs. observations of others on insight in psychotic disorders.	David AS, Chis Ster I, Zavarei H.	J Nerv Ment Dis	32.6	18	40	5
22456602	The effect of frequent hemodialysis on nutrition and body composition: frequent Hemodialysis Network Trial.	Kaysen GA, Greene T, Larive B, Mehta RL, Lindsay RM, Depner TA, Hall YN, Daugirdas JT, Chertow GM; FHN Trial Group.	Kidney Int	51	13	332	14
22456803	Role of antibiotic therapy in mild acute calculus cholecystitis: a prospective randomized controlled trial.	Mazeh H, Mizrahi I, Dior U, Simanovsky N, Shapiro M, Freund HR, Eid A.	World J Surg	45.6	18	84	11
22457014	Salbutamol but not ipratropium abolishes leukotriene D4-induced gas e-change abnormalities in asthma.	Dahlen B, GÃ³mez FP, Casas A, Howarth PH, Dahlen SE, Rodriguez-Roisin R.	Eur J Clin Pharmacol	28	999	12	10
22458601	Effect of hawthorn standardized e-tract on flow mediated dilation in prehypertensive and mildly hypertensive adults: a randomized, controlled cross-over trial.	Asher GN, Viera AJ, Weaver MA, Dominik R, Caughey M, Hinderliter AL.	BMC Complement Altern Med	50.9	18	21	9
22458918	Fi-ed-combination brimonidine-timolol versus latanoprost in glaucoma and ocular hypertension: a 12-week, randomized, comparison study.	Katz LJ, Rauchman SH, Cottingham AJ Jr, Simmons ST, Williams JM, Schiffman RM, Hollander DA.	Curr Med Res Opin	63.5	18	148	7
22458978	E-learning improves knowledge and practical skills in haemophilia patients on home treatment: a randomized controlled trial.	Mulders G, de Wee EM, Vahedi Nikbakht-Van de Sande MC, Kruip MJ, Elfrink EJ, Leebeek FW.	Haemophilia	33.5	16	30	3
22459124	Minimally invasive total knee arthroplasty improves early knee strength but not functional performance: a randomized controlled trial.	Stevens-Lapsley JE, Bade MJ, Shulman BC, Kohrt WM, Dayton MR.	J Arthroplasty	64.3	50	44	13
22459346	Diagnostic accuracy of visual urethral mobility e-am versus Q-Tip test: a randomized crossover trial.	Robinson BL, Geller EJ, Parnell BA, Crane AK, Jannelli ML, Wells EC, Connolly A, Matthews CA.	Am J Obstet Gynecol	57.2	18	54	14
22459388	Effects of Vitamin D supplementation on markers of vascular function after myocardial infarction-A randomised controlled trial.	Witham MD, Dove FJ, Khan F, Lang CC, Belch JJ, Struthers AD.	Int J Cardiol	65.9	999	75	9
22459549	Efficacy and tolerability of lasmiditan, an oral 5-HT(1F) receptor agonist, for the acute treatment of migraine: a phase 2 randomised, placebo-controlled, parallel-group, dose-ranging study.	FÃ¤rkkilÃ¤ M, Diener HC, Geraud G, LÃ¡inez M, Schoenen J, Harner N, Pilgrim A, Reuter U; COL MIG-202 study group.	Lancet Neurol	40.3	18	391	6
22459631	Comparison of warm and cold contrast media for hysterosalpingography: a prospective, randomized study.	Zhu YY, Mao YZ, Wu WL.	Fertil Steril	27.2	999	197	14
22460421	Health-related quality of life in nonsplenectomized immune thrombocytopenia patients receiving romiplostim or medical standard of care.	Kuter DJ, Mathias SD, Rummel M, Mandanas R, Giagounidis AA, Wang -, Deuson RR.	Am J Hematol	55	999	234	3
22461535	Effects of sevelamer on HbA1c, inflammation, and advanced glycation end products in diabetic kidney disease.	Vlassara H, Uribarri J, Cai W, Goodman S, Pyzik R, Post J, Grosjean F, Woodward M, Striker GE.	Clin J Am Soc Nephrol	61.1	999	20	14
22462626	Increasing the dose of vardenafil on a daily basis does not improve erectile function after unilateral nerve-sparing radical prostatectomy.	Bannowsky A, van Ahlen H, Loch T.	J Se- Med	61.4	999	36	14
22463488	The effect of household heads training on long-lasting insecticide-treated bed nets utilization: a cluster randomized controlled trial in Ethiopia.	Deribew A, Birhanu Z, Sena L, Dejene T, Reda AA, Sudhakar M, Alemseged F, Tessema F, Zeynudin A, Biadgilign S, Deribe K.	Malar J	999	999	21673	1
22464526	Effect of a low-level laser on bone regeneration after rapid ma-illary e-pansion.	Cepera F, Torres FC, Scanavini MA, Paranhos LR, Capelozza Filho L, Cardoso MA, Siqueira DC, Siqueira DF.	Am J Orthod Dentofacial Orthop	10.2	999	27	22
22467989	Ambient temperature and obstructive sleep apnea: effects on sleep, sleep apnea, and morning alertness.	Valham F, Sahlin C, Stenlund H, Franklin KA.	Sleep	59.6	999	40	6
22469559	Health-related quality of life in elderly, newly diagnosed multiple myeloma patients treated with VMP vs. MP: results from the VISTA trial.	Delforge M, Dhawan R, Robinson D Jr, Meunier J, Regnault A, Esseltine DL, Cakana A, van de Velde H, Richardson PG, San Miguel JF.	Eur J Haematol	71	999	649	2
22471392	Effects of atenolol, perindopril and verapamil on haemodynamic and vascular function in Marfan syndrome - a randomised, double-blind, crossover trial.	Williams A, Kenny D, Wilson D, Fagenello G, Nelson M, Dunstan F, Cockcroft J, Stuart G, Fraser AG.	Eur J Clin Invest	30.4	16	14	17
22472272	Patellar tendon healing with platelet-rich plasma: a prospective randomized controlled trial.	de Almeida AM, Demange MK, Sobrado MF, Rodrigues MB, Pedrinelli A, Hernandez AJ.	Am J Sports Med	24.3	999	27	13
22472562	Distinct metabolic surrogates predict basal and rebound GH secretion after glucose ingestion in men.	Iranmanesh A, Lawson D, Veldhuis JD.	J Clin Endocrinol Metab	39	18	69	4
22475741	Swallowed fluticasone improves histologic but not symptomatic response of adults with eosinophilic esophagitis.	Ale-ander JA, Jung KW, Arora AS, Enders F, Katzka DA, Kephardt GM, Kita H, Kryzer LA, Romero Y, Smyrk TC, Talley NJ.	Clin Gastroenterol Hepatol	37.5	18	42	11
22479155	Intermittent preventive treatment for malaria in Papua New Guinean infants e-posed to Plasmodium falciparum and P. viva-: a randomized controlled trial.	Senn N, Rarau P, Stanisic DI, Robinson L, Barnadas C, Manong D, Salib M, Iga J, Tarongka N, Ley S, Rosanas-Urgell A, Aponte JJ, Zimmerman PA, Beeson JG, Schofield L, Siba P, Rogerson SJ, Reeder JC, Mueller I.	PLoS Med	0.3	0.25	1121	1
22480146	The effects of adjuvant insulin therapy among pregnant women with IGT who failed to achieve the desired glycemia levels by diet and moderate physical activity.	Gojnic M, Perovic M, Pervulov M, Ljubic A.	J Matern Fetal Neonatal Med	29	18	283	15
22480818	Effect of escitalopram on hot flash interference: a randomized, controlled trial.	Carpenter JS, Guthrie KA, Larson JC, Freeman EW, Joffe H, Reed SD, Ensrud KE, LaCroi- AZ.	Fertil Steril	53.9	40	205	14
22483680	Nabi-imols for opioid-treated cancer patients with poorly-controlled chronic pain: a randomized, placebo-controlled, graded-dose trial.	Portenoy RK, Ganae-Motan ED, Allende S, Yanagihara R, Shaiova L, Weinstein S, McQuade R, Wright S, Fallon MT.	J Pain	58	999	360	2
22484026	Comparing vertical and coracoid approaches for infraclavicular block in orthopedic surgery of the forearm and hand.	Mosaffa F, Gharaei B, Rafeeyan M, Gachkar L.	J Clin Anesth	38.5	999	60	13
22486849	Effects of three target-controlled concentrations of sufentanil on MAC(BAR) of sevoflurane.	Liu Z, Wang JF, Meng Y, Fan -H, Deng -M, Li JB, Cai GJ.	CNS Neurosci Ther	999	20	82	9
22487270	Management of mandibular interforaminal fractures using 3 dimensional locking and standard titanium miniplates - a comparative preliminary report of 10 cases.	Jain MK, Sankar K, Ramesh C, Bhatta R.	J Cranioma-illofac Surg	999	16	20	13
22488402	Impact of diagnosing metabolic syndrome on risk perception.	Jumean MF, Korenfeld Y, Somers VK, Vickers KS, Thomas RJ, Lopez-Jimenez F.	Am J Health Behav	50	18	74	4
22490589	Comparison of the effectiveness of de-medetomidine versus propofol target-controlled infusion for sedation during coblation-assisted upper airway procedure.	Ma --, Fang -M, Hou TN.	Chin Med J (Engl)	49.4	999	60	6
22491410	Adherence to occlusion therapy in the first si- months of follow-up and visual acuity among participants in the Infant Aphakia Treatment Study (IATS).	Drews-Botsch CD, Celano M, Kruger S, Hartmann EE; Infant Aphakia Treatment Study.	Invest Ophthalmol Vis Sci	999	999	108	17
22491507	Empowerment training and direct support professionals' attitudes about individuals with intellectual disabilities.	Flatt-Fultz E, Phillips LA.	J Intellect Disabil	37.1	999	43	5
22491790	Early detection and intervention evaluation for people at risk of psychosis: multisite randomised controlled trial.	Morrison AP, French P, Stewart SL, Birchwood M, Fowler D, Gumley AI, Jones PB, Bentall RP, Lewis SW, Murray GK, Patterson P, Brunet K, Conroy J, Parker S, Reilly T, Byrne R, Davies LM, Dunn G.	BMJ	20.7	14	288	5
22492654	Association between body mass inde- and pregnancy outcome in a randomized trial of cerclage for short cervi-.	Farinelli CK, Wing DA, Szychowski JM, Owen J, Hankins G, Iams JD, Sheffield JS, Perez-Delboy A, Berghella V, Guzman ER; for the Vaginal Ultrasound Trial Consortium.	Ultrasound Obstet Gynecol	26.6	999	986	14
22493375	Intra-arterial infusion of irinotecan-loaded drug-eluting beads (DEBIRI) versus intravenous therapy (FOLFIRI) for hepatic metastases from colorectal cancer: final results of a phase III study.	Fiorentini G, Aliberti C, Tilli M, Mulazzani L, Graziano F, Giordani P, Mambrini A, Montagnani F, Alessandroni P, Catalano V, Coschiera P.	Anticancer Res	63.5	999	74	2
22496199	A randomized, double-blind, placebo-controlled trial of antidepressants in Parkinson disease.	Richard IH, McDermott MP, Kurlan R, Lyness JM, Como PG, Pearson N, Factor SA, Juncos J, Serrano Ramos C, Brodsky M, Manning C, Marsh L, Shulman L, Fernandez HH, Black KJ, Panisset M, Christine CW, Jiang W, Singer C, Horn S, Pfeiffer R, Rottenberg D, et al.	Neurology	999	30	115	6
22497915	Oral care and oropharyngeal and tracheal colonization by Gram-negative pathogens in children.	Kusahara DM, Friedlander LT, Peterlini MA, Pedreira ML.	Nurs Crit Care	4.1	999	74	10
22497967	A gastroretentive gabapentin formulation for the treatment of painful diabetic peripheral neuropathy: efficacy and tolerability in a double-blind, randomized, controlled clinical trial.	Sandercock D, Cramer M, Biton V, Cowles VE.	Diabetes Res Clin Pract	58.7	18	147	4
22498923	Real-time moment-to-moment emotional responses to narrative and informational breast cancer videos in African American women.	Bollinger S, Kreuter MW.	Health Educ Res	61	40	59	2
22499288	Losartan versus atenolol-based antihypertensive treatment reduces cardiovascular events especially well in elderly patients: the Losartan Intervention For Endpoint reduction in hypertension (LIFE) study.	Ruwald AC, Westergaard B, Sehestedt T, Kjeldsen SE, Lindholm LH, Wachtell K, Devereu- RB, Ibsen H, Nieminen MS, Dahlof B, Olsen MH.	J Hypertens	67	999	9193	9
22500855	Prospective clinical trial to compare standard colon-reflecting with transmesocolic laparoscopic pyeloplasty.	Shadpour P, Nayyeri RK, Daneshvar R, Salimi H, Radfar H.	BJU Int	14	999	64	14
22502833	Muscle strength enhancement following home-based virtual cycling training in ambulatory children with cerebral palsy.	Chen CL, Hong WH, Cheng HY, Liaw MY, Chung CY, Chen CY.	Res Dev Disabil	8.6	6	28	6
22505632	Results of a phase II placebo-controlled randomized trial of minocycline in acute spinal cord injury.	Casha S, Zygun D, McGowan MD, Bains I, Yong VW, Hurlbert RJ.	Brain	36.5	16	52	6
22508022	The effect of the Nintendo Wii Fit and e-ercise in improving balance and quality of life in community dwelling elders.	Franco JR, Jacobs K, Inzerillo C, Kluzik J.	Technol Health Care	78.2	60	32	5
22508814	Accelerated radiotherapy with carbogen and nicotinamide for laryngeal cancer: results of a phase III randomized trial.	Janssens GO, Rademakers SE, Terhaard CH, Doornaert PA, Bijl HP, van den Ende P, Chin A, Marres HA, de Bree R, van der Kogel AJ, Hoogsteen IJ, Bussink J, Span PN, Kaanders JH.	J Clin Oncol	60.5	18	345	2
22508825	Cladribine, but not fludarabine, added to daunorubicin and cytarabine during induction prolongs survival of patients with acute myeloid leukemia: a multicenter, randomized phase III study.	Holowiecki J, Grosicki S, Giebel S, Robak T, Kyrcz-Krzemien S, Kuliczkowski K, Skotnicki AB, Hellmann A, Sulek K, Dmoszynska A, Kloczko J, Jedrzejczak WW, Zdziarska B, Warzocha K, Zawilska K, Komarnicki M, Kielbinski M, Piatkowska-Jakubas B, Wierzbowska A, Wach M, Haus O.	J Clin Oncol	47	16	652	2
22509084	Comparison of PPIs and H2-receptor antagonists plus prokinetics for dysmotility-like dyspepsia.	Sakaguchi M, Takao M, Ohyama Y, Oka H, Yamashita H, Fukuchi T, Ashida K, Murotani M, Murotani M, Majima K, Morikawa H, Hashimoto T, Kiyota K, Esaki H, Amemoto K, Isowa G, Takao F.	World J Gastroenterol	52.2	18	114	11
22513649	Effect of vertebroplasty on pain relief, quality of life, and the incidence of new vertebral fractures: a 12-month randomized follow-up, controlled trial.	Blasco J, Martinez-Ferrer A, Macho J, San Roman L, Pomes J, Carrasco J, Monegal A, GuaÃ±abens N, Peris P.	J Bone Miner Res	73.3	999	125	13
22514257	Comparative evaluation of the effects of trane-amic acid and low-dose aprotinin on post-valvular heart surgery bleeding and allogenic transfusion.	Mansouri M, Attary M, Bagheri K, Massoumi G, Ghavami B.	Interact Cardiovasc Thorac Surg	46.4	18	90	9
22515360	Randomized comparison of two non-bismuth-containing second-line rescue therapies for Helicobacter pylori.	Chuah SK, Hsu PI, Chang KC, Chiu YC, Wu KL, Chou YP, Hu ML, Tai WC, Chiu KW, Chiou SS, Wu DC, Hu TH.	Helicobacter	57.1	18	128	1
22515432	When effects of the universal psychological need for autonomy on health behaviour e-tend to a large proportion of individuals: a field e-periment.	Chatzisarantis NL, Hagger MS, Kamarova S, Kawabata M.	Br J Health Psychol	22.8	999	152	5
22515587	Clinical comparison of two hyaluronic acid-derived fillers in the treatment of nasolabial folds: MesoglowÂ® and IAL SystemÂ®.	Ahn JY, Lee SH, Park KY, Hong CK, Song HJ, Park MY, Choi YS, Seo SJ.	Int J Dermatol	46.7	30	40	12
22516357	Second multicenter, randomized, double-blind, parallel-group evaluation of effectiveness and safety of intravesical sodium chondroitin sulfate compared with inactive vehicle control in subjects with interstitial cystitis/bladder pain syndrome.	Nickel JC, Hanno P, Kumar K, Thomas H.	Urology	45.6	999	98	14
22516862	Dietary outcomes of the healthy dads healthy kids randomised controlled trial.	Burrows T, Morgan PJ, Lubans DR, Callister R, Okely T, Bray J, Collins CE.	J Pediatr Gastroenterol Nutr	41.3	21	50	4
22517917	The effectiveness of SPAR-, a computerised self help intervention for adolescents seeking help for depression: randomised controlled non-inferiority trial.	Merry SN, Stasiak K, Shepherd M, Frampton C, Fleming T, Lucassen MF.	BMJ	15.6	12	187	5
22518827	Transient receptor potential vanilloid type 1 channels contribute to refle- cutaneous vasodilation in humans.	Wong BJ, Fieger SM.	J Appl Physiol	999	999	12	18
22519853	Long-term effects of malaria prevention with insecticide-treated mosquito nets on morbidity and mortality in African children: randomised controlled trial.	Louis VR, Bals J, Tiendrebeogo J, Bountogo M, Ramroth H, De Allegri M, Traore C, Beiersmann C, Coulibaly B, Ye M, Jahn A, Becher H, Muller O.	Trop Med Int Health	8.7	999	3387	1
22519919	Imeglimin, a novel glimin oral antidiabetic, e-hibits a good efficacy and safety profile in type 2 diabetic patients.	Pirags V, Lebovitz H, Fouqueray P.	Diabetes Obes Metab	58.2	18	187	4
22523305	On-pump versus off-pump coronary artery bypass surgery in elderly patients: results from the Danish on-pump versus off-pump randomization study.	Houlind K, Kjeldsen BJ, Madsen SN, Rasmussen BS, Holme SJ, Nielsen PH, Mortensen PE; DOORS Study Group.	Circulation	75	70	900	9
22524802	Psychological impact of health risk appraisal of Korean women at different levels of breast cancer risk: neglected aspect of the web-based cancer risk assessment tool.	Kye SY, Park K, Park HG, Kim MH.	Asian Pac J Cancer Prev	41.7	999	20	2
22525048	Tofacitinib (CP-690,550), a Janus kinase inhibitor for dry eye disease: results from a phase 1/2 trial.	Liew SH, Nichols KK, Klamerus KJ, Li JZ, Zhang M, Foulks GN.	Ophthalmology	60	18	327	7
22525343	A randomized placebo controlled double blind crossover study of pioglitazone on left ventricular diastolic function in type 2 diabetes.	Hughes AD, Park C, March K, Coady E, Khir A, Chaturvedi N, Thom SA.	Int J Cardiol	59.5	18	24	4
22525775	Aerobic and resistance training effects on energy intake: the STRRIDE-AT/RT study.	Bales CW, Hawk VH, Granville EO, Rose SB, Shields T, Bateman L, Willis L, Piner LW, Slentz CA, Houmard JA, Gallup D, Samsa GP, Kraus WE.	Med Sci Sports E-erc	49	18	79	5
22526050	Fast-track surgery improves postoperative clinical recovery and immunity after elective surgery for colorectal carcinoma: randomized controlled clinical trial.	Yang D, He W, Zhang S, Chen H, Zhang C, He Y.	World J Surg	58.3	18	62	2
22526448	Efficacy of cryoanalgesia in decreasing pain during second trimester genetic amniocentesis: a randomized trial.	Hanprasertpong T, Kor-Anantakul O, Prasartwanakit V, Leetanaporn R, Suntharasaj T, Suwanrath C.	Arch Gynecol Obstet	37.2	999	372	21
22527786	Effect of de-amethasone on the frequency of postdural puncture headache after spinal anesthesia for cesarean section: a double-blind randomized clinical trial.	Yousefshahi F, Dahmardeh AR, Khajavi M, Najafi A, Khashayar P, Barkhordari K.	Acta Neurol Belg	28.7	999	360	6
22528280	Decompressive hemicraniectomy in malignant middle cerebral artery infarct: a randomized controlled trial enrolling patients up to 80 years old.	Zhao J, Su YY, Zhang Y, Zhang YZ, Zhao R, Wang L, Gao R, Chen W, Gao D.	Neurocrit Care	64	18	47	6
22531973	The effect of reminders in a web-based intervention study.	Svensson M, Svensson T, Hansen AW, Trolle Lagerros Y.	Eur J Epidemiol	999	18	1458	21
22532074	The role of user control in adherence to and knowledge gained from a website: randomized comparison between a tunneled version and a freedom-of-choice version.	Crutzen R, Cyr D, de Vries NK.	J Med Internet Res	49	18	668	21
22532960	Brushing skills and plaque reduction using single- and triple-headed toothbrushes.	Levin L, Marom Y, Ashkenazi M.	Quintessence Int	20.2	18	190	22
22533801	Efficacy of a reading and language intervention for children with Down syndrome: a randomized controlled trial.	Burgoyne K, Duff FJ, Clarke PJ, Buckley S, Snowling MJ, Hulme C.	J Child Psychol Psychiatry	6.6	999	54	17
22534422	Mesh reinforcement of pancreatic transection decreases incidence of pancreatic occlusion failure for left pancreatectomy: a single-blinded, randomized controlled trial.	Hamilton NA, Porembka MR, Johnston FM, Gao F, Strasberg SM, Linehan DC, Hawkins WG.	Ann Surg	58	18	100	11
22534580	Mental contamination: the effects of imagined physical dirt and immoral behaviour.	Elliott CM, Radomsky AS.	Behav Res Ther	22.7	999	140	5
22534814	Randomized phase 2b study of pralatre-ate versus erlotinib in patients with stage IIIB/IV non-small-cell lung cancer (NSCLC) after failure of prior platinum-based therapy.	Kelly K, Azzoli CG, Zatloukal P, Albert I, Jiang PY, Bodkin D, Pereira JR, JuhÃ¡sz E, Iannotti NO, Weems G, Koutsoukos T, Patel JD.	J Thorac Oncol	62.5	18	201	2
22535517	Double-blind placebo-controlled trial of quetiapine in anore-ia nervosa.	Powers PS, Klabunde M, Kaye W.	Eur Eat Disord Rev	34	18	21	5
22536889	Efficacy of acupuncture for acute migraine attack: a multicenter single blinded, randomized controlled trial.	Wang LP, Zhang -Z, Guo J, Liu HL, Zhang Y, Liu CZ, Yi JH, Wang LP, Zhao JP, Li SS.	Pain Med	38.2	18	140	6
22537990	Interchangeability and tolerability of two inactivated hepatitis A vaccines in Chinese children.	Zhang ZL, Zhu -J, Wang -, Liang M, Sun J, Liu Y, Gao ZG, Wu JY, Dong -J, Liu RK, Chen JT, Zhang YQ, Wang W, Zhang LP, Yin W.	Vaccine	50.5	1.5	303	1
22538140	Mobile phone-based video messages for diabetes self-care support.	Bell AM, Fonda SJ, Walker MS, Schmidt V, Vigersky RA.	J Diabetes Sci Technol	58	18	64	4
22539562	First-line treatment of advanced ovarian cancer with paclita-el/carboplatin with or without epirubicin (TEC versus TC)--a gynecologic cancer intergroup study of the NSGO, EORTC GCG and NCIC CTG.	Lindemann K, Christensen RD, Vergote I, Stuart G, Izquierdo MA, KÃ¦rn J, Havsteen H, Eisenhauer E, Ridderheim M, Lopez AB, Hirte H, Aavall-Lundquvist E, Vrdoljak E, Green J, Kristensen GB.	Ann Oncol	57	18	887	2
22539783	Lipids and lipoproteins and risk of different vascular events in the MRC/BHF Heart Protection Study.	Parish S, Offer A, Clarke R, Hopewell JC, Hill MR, Otvos JD, Armitage J, Collins R; Heart Protection Study Collaborative Group.	Circulation	999	40	20021	9
22540412	Impact of platform switching on inter-pro-imal bone levels around short implants in the posterior region; 1-year results from a randomized clinical trial.	Telleman G, Raghoebar GM, Vissink A, Meijer HJ.	J Clin Periodontol	49.8	18	80	22
22541306	Effectiveness of supported employment for veterans with spinal cord injuries: results from a randomized multisite study.	Ottomanelli L, Goetz LL, Suris A, McGeough C, Sinnott PL, Toscano R, Barnett SD, Cipher DJ, Lind LM, Di-on TM, Holmes SA, Kerrigan AJ, Thomas FP.	Arch Phys Med Rehabil	48.3	18	201	6
22544892	Effect of mindfulness training on asthma quality of life and lung function: a randomised controlled trial.	Pbert L, Madison JM, Druker S, Olendzki N, Magner R, Reed G, Allison J, Carmody J.	Thora-	52.8	999	83	10
22545252	Microwave denture disinfection versus nystatin in treating patients with well-controlled type 2 diabetes and denture stomatitis: a randomized clinical trial.	Sanita PV, Machado AL, Pavarina AC, Massucato EM, Colombo AL, Vergani CE.	Int J Prosthodont	62.4	18	40	4
22548691	Effectiveness of Dader Method for pharmaceutical care on control of blood pressure and total cholesterol in outpatients with cardiovascular disease or cardiovascular risk: EMDADER-CV randomized controlled trial.	Amariles P, Sabater-HernÃ¡ndez D, GarcÃ­a-Jimenez E, RodrÃ­guez-Chamorro MÃ, Prats-MÃ¡s R, MarÃ­n-MagÃ¡n F, GalÃ¡n-Ceballos JA, Jimenez-MartÃ­n J, Faus MJ.	J Manag Care Pharm	62.8	25	714	9
22549432	N-acetylcysteine reduces disease activity by blocking mammalian target of rapamycin in T cells from systemic lupus erythematosus patients: a randomized, double-blind, placebo-controlled trial.	Lai ZW, Hanczko R, Bonilla E, Caza TN, Clair B, Bartos A, Miklossy G, Jimah J, Doherty E, Tily H, Francis L, Garcia R, Dawood M, Yu J, Ramos I, Coman I, Faraone SV, Phillips PE, Perl A.	Arthritis Rheum	44.6	18	36	12
22549879	Rilonacept (interleukin-1 trap) for prevention of gout flares during initiation of uric acid-lowering therapy: results from a phase III randomized, double-blind, placebo-controlled, confirmatory efficacy study.	Schumacher HR Jr, Evans RR, Saag KG, Clower J, Jennings W, Weinstein SP, Yancopoulos GD, Wang J, Terkeltaub R.	Arthritis Care Res (Hoboken)	52.3	18	240	13
22551104	A randomized trial of urodynamic testing before stress-incontinence surgery.	Nager CW, Brubaker L, Litman HJ, Zyczynski HM, Varner RE, Amundsen C, Sirls LT, Norton PA, Arisco AM, Chai TC, Zimmern P, Barber MD, Dandreo KJ, Menefee SA, Kenton K, Lowder J, Richter HE, Khandwala S, Nygaard I, Kraus SR, Johnson HW, Lemack GE, et al.	N Engl J Med	51.8	21	523	14
22551950	Adipose triglyceride lipase and hormone-sensitive lipase protein e-pression in subcutaneous adipose tissue is decreased after an isoenergetic low-fat high-comple- carbohydrate diet in the metabolic syndrome.	van Hees AM, Jocken JW, Essers Y, Roche HM, Saris WH, Blaak EE.	Metabolism	57.7	999	32	4
22554359	Diastolic function parameters are improved by the addition of simvastatin to enalapril-based treatment in hypertensive individuals.	Beck AL, Otto ME, D'Avila LB, Netto FM, Armendaris MK, Sposito AC.	Atherosclerosis	54.1	40	54	9
22554721	Effects of preoperative aspirin in coronary artery bypass grafting: a double-blind, placebo-controlled, randomized trial.	Deja MA, Kargul T, Domaradzki W, StÄ?cel T, Mazur W, Wojakowski W, GocoÅ? R, Gaszewska-Å»urek E, Å»urek P, Pytel A, WoÅ? S.	J Thorac Cardiovasc Surg	59	999	783	9
22555430	rTMS with motor training modulates cortico-basal ganglia-thalamocortical circuits in stroke patients.	Chang WH, Kim YH, Yoo WK, Goo KH, Park CH, Kim ST, Pascual-Leone A.	Restor Neurol Neurosci	58.8	999	17	6
22557744	Pain during venous cannulation: Double-blind, randomized clinical trial of analgesic effect between topical amethocaine and eutectic mi-ture of local anesthetic.	Yeoh C, Lee C.	J Anaesthesiol Clin Pharmacol	40.5	18	79	22
22561055	Viscous topical is more effective than nebulized steroid therapy for patients with eosinophilic esophagitis.	Dellon ES, Sheikh A, Speck O, Woodward K, Whitlow AB, Hores JM, Ivanovic M, Chau A, Woosley JT, Madanick RD, Orlando RC, Shaheen NJ.	Gastroenterology	35	999	22	11
22561463	Training hospital providers in basic CPR skills in Botswana: acquisition, retention and impact of novel training techniques.	Meaney PA, Sutton RM, Tsima B, Steenhoff AP, Shilkofski N, Boulet JR, Davis A, Kestler AM, Church KK, Niles DE, Irving SY, Mazhani L, Nadkarni VM.	Resuscitation	27	999	215	9
22561530	Cardiometabolic changes after continuous positive airway pressure for obstructive sleep apnoea: a randomised sham-controlled study.	Hoyos CM, Killick R, Yee BJ, Phillips CL, Grunstein RR, Liu PY.	Thora-	48.7	18	65	6
22561556	Evaluation of clinical safety and tolerance of a Lactobacillus reuteri NCIMB 30242 supplement capsule: a randomized control trial.	Jones ML, Martoni CJ, Di Pietro E, Simon RR, Prakash S.	Regul To-icol Pharmacol	49.2	20	131	11
22564206	Reduced substance use as a secondary benefit of an indicated cognitive-behavioral adolescent depression prevention program.	Rohde P, Stice E, Gau JM, Marti CN.	Psychol Addict Behav	15.6	999	341	5
22565511	Impact of a modified carbonated beverage on human dental plaque and salivary pH: an in vivo study.	Sardana V, Balappanavar AY, Patil GB, Kulkarni N, Sagari SG, Gupta KD.	J Indian Soc Pedod Prev Dent	22.2	999	24	22
22565936	Pacemaker therapy in patients with neurally mediated syncope and documented asystole: Third International Study on Syncope of Uncertain Etiology (ISSUE-3): a randomized trial.	Brignole M, Menozzi C, Moya A, Andresen D, Blanc JJ, Krahn AD, Wieling W, Beiras -, Deharo JC, Russo V, Tomaino M, Sutton R; International Study on Syncope of Uncertain Etiology 3 (ISSUE-3) Investigators.	Circulation	63	40	77	9
22567095	Efficacy of memantine for agitation in Alzheimer's dementia: a randomised double-blind placebo controlled trial.	Fo- C, Crugel M, Maidment I, Auestad BH, Coulton S, Treloar A, Ballard C, Boustani M, Katona C, Livingston G.	PLoS One	84.6	45	149	6
22569039	E-ercise-induced muscle damage is reduced in resistance-trained males by branched chain amino acids: a randomized, double-blind, placebo controlled study.	Howatson G, Hoad M, Goodall S, Tallent J, Bell PG, French DN.	J Int Soc Sports Nutr	23	999	12	13
22570062	Involuntary memories after a positive film are dampened by a visuospatial task: unhelpful in depression but helpful in mania?	Davies C, Malik A, Pictet A, Blackwell SE, Holmes EA.	Clin Psychol Psychother	20.3	999	71	5
22571072	Impact of preoperative information on an-iety and disease-related knowledge in women undergoing mastectomy for breast cancer: a randomized clinical trial.	Wysocki WM, MituÅ? J, Komorowski AL, Karolewski K.	Acta Chir Belg	57.5	18	60	21
22571552	The impact of carvedilol and metoprolol on serum lipid concentrations and symptoms in patients with hyperthyroidism.	Ozbilen S, Eren MA, Turan MN, Sabuncu T.	Endocr Res	32.2	18	30	4
22573261	Five-year results of a randomized clinical trial comparing a polypropylene mesh with a poliglecaprone and polypropylene composite mesh for inguinal hernioplasty.	Bury K, Å?mietaÅ?ski M; Polish Hernia Study Group.	Hernia	999	20	600	13
22575311	Intraprocedural thrombotic events during percutaneous coronary intervention in patients with non-ST-segment elevation acute coronary syndromes are associated with adverse outcomes: analysis from the ACUITY (Acute Catheterization and Urgent Intervention Triage Strategy) trial.	McEntegart MB, Kirtane AJ, Cristea E, Brener S, Mehran R, Fahy M, Moses JW, Stone GW.	J Am Coll Cardiol	61	999	3428	9
22575312	Clinical outcomes following stent thrombosis occurring in-hospital versus out-of-hospital: results from the HORIZONS-AMI (Harmonizing Outcomes with Revascularization and Stents in Acute Myocardial Infarction) trial.	Dangas GD, Claessen BE, Mehran R, Brener S, Brodie BR, Dudek D, Witzenbichler B, Peruga JZ, Guagliumi G, Moses JW, Lansky AJ, -u K, Stone GW.	J Am Coll Cardiol	58.2	999	156	9
22575396	Palliative management for patients with subacute obstruction and stage IV unresectable rectosigmoid cancer: colostomy versus endoscopic stenting: final results of a prospective randomized trial.	Fiori E, Lamazza A, Schillaci A, Femia S, Demasi E, Decesare A, Sterpetti AV.	Am J Surg	76.6	999	22	2
22576305	Efficacy of Acacia senegal for stoma care in children with colostomy.	Hosseinpour M, Fazeli A, Agabeigi M.	Eur J Pediatr Surg	0	999	60	11
22576981	A randomized controlled trial of a support group intervention on the quality of life and fatigue in women after primary treatment for early breast cancer.	Bjorneklett HG, Lindemalm C, Ojutkangas ML, Berglund A, Letocha H, Strang P, Bergkvist L.	Support Care Cancer	58	999	382	2
22578914	Intravenous immunoglobulin versus intravenous methylprednisolone for chronic inflammatory demyelinating polyradiculoneuropathy: a randomised controlled trial.	Nobile-Orazio E, Cocito D, Jann S, Uncini A, Beghi E, Messina P, Antonini G, Fazio R, Gallia F, Schenone A, Francia A, Pareyson D, Santoro L, Tamburin S, Macchia R, Cavaletti G, Giannini F, Sabatelli M; IMC Trial Group.	Lancet Neurol	60	18	45	6
22579379	Correlation in rectal cancer between clinical tumor response after neoadjuvant radiotherapy and sphincter or organ preservation: 10-year results of the Lyon R 96-02 randomized trial.	Ortholan C, Romestaing P, Chapet O, Gerard JP.	Int J Radiat Oncol Biol Phys	68	999	88	2
22579678	Comparison of times of intervention during pediatric CPR maneuvers using ABC and CAB sequences: a randomized trial.	Lubrano R, Cecchetti C, Bellelli E, Gentile I, Loayza Levano H, Orsini F, Bertazzoni G, Messi G, Rugolotto S, Pirozzi N, Elli M.	Resuscitation	24	999	340	19
22580220	The effects of emotion regulation on the desire to overeat in restrained eaters.	Svaldi J, Tuschen-Caffier B, Lackner HK, Zimmermann S, Naumann E.	Appetite	22.7	18	94	5
22583697	Efficacy and safety of alogliptin added to metformin in Japanese patients with type 2 diabetes: a randomized, double-blind, placebo-controlled trial with an open-label, long-term e-tension study.	Seino Y, Miyata Y, Hiroi S, Hirayama M, Kaku K.	Diabetes Obes Metab	52.6	20	288	4
22584134	Effect of intensive versus standard blood pressure control on depression and health-related quality of life in type 2 diabetes: the ACCORD trial.	O'Connor PJ, Narayan KM, Anderson R, Feeney P, Fine L, Ali MK, Simmons DL, Hire DG, Sperl-Hillen JM, Katz LA, Margolis KL, Sullivan MD.	Diabetes Care	999	999	4733	5
22584629	The effect of prophylactic transpapillary pancreatic stent insertion on clinically significant leak rate following distal pancreatectomy: results of a prospective controlled clinical trial.	Frozanpor F, Lundell L, SegersvÃ¤rd R, Arnelo U.	Ann Surg	999	18	58	11
22584733	Ta-ane-induced peripheral neuropathy and health-related quality of life in postoperative breast cancer patients undergoing adjuvant chemotherapy: N-SAS BC 02, a randomized clinical trial.	Shimozuma K, Ohashi Y, Takeuchi A, Aranishi T, Morita S, Kuroi K, Ohsumi S, Makino H, Katsumata N, Kuranami M, Suemasu K, Watanabe T, Hausheer FH.	Support Care Cancer	51.7	999	300	2
22584763	Randomized trial of automated, electronic monitoring to facilitate early detection of sepsis in the intensive care unit*.	Hooper MH, Weavind L, Wheeler AP, Martin JB, Gowda SS, Semler MW, Hayes RM, Albert DW, Deane NB, Nian H, Mathe JL, Nadas A, Sztipanovits J, Miller A, Bernard GR, Rice TW.	Crit Care Med	44.5	999	442	1
22585765	A double-blind, placebo-controlled trial of Ï?-3 fatty acids in Tourette's disorder.	Gabbay V, Babb JS, Klein RG, Panzer AM, Katz Y, Alonso CM, Petkova E, Wang J, Coffey BJ.	Pediatrics	11.3	6	33	5
22587862	Effect of a mobile safety alarm on going outside, feeling safe, fear of falling, and quality of life in community-living older persons: a randomized controlled trial.	Scheffer AC, Scholte op Reimer WJ, van Dijk N, van Munster BC, Abu-Hanna A, Levi M, de Rooij SE.	J Am Geriatr Soc	81	65	203	21
22588236	Usefulness of cortical mastoidectomy in myringoplasty.	Albu S, Trabalzini F, Amadori M.	Otol Neurotol	26.7	999	282	8
22591589	Scapula alata in early breast cancer patients enrolled in a randomized clinical trial of post-surgery short-course image-guided radiotherapy.	Adriaenssens N, De Ridder M, Lievens P, Van Parijs H, Vanhoeij M, Miedema G, Voordeckers M, Versmessen H, Storme G, Lamote J, Pauwels S, Vinh-Hung V.	World J Surg Oncol	56.6	18	119	2
22591717	A comparative study of the effect of suture-less and multiple suture techniques on inflammatory complications following third molar surgery.	Osunde OD, Adebola RA, Saheeb BD.	Int J Oral Ma-illofac Surg	27.1	999	80	22
22591726	A randomized trial of induction chemotherapy plus concurrent chemoradiotherapy versus induction chemotherapy plus radiotherapy for locoregionally advanced nasopharyngeal carcinoma.	Huang PY, Cao KJ, Guo -, Mo HY, Guo L, -iang YQ, Deng MQ, Qiu F, Cao SM, Guo Y, Zhang L, Li NW, Sun R, Chen QY, Luo DH, Hua YJ, Mai HQ, Hong MH.	Oral Oncol	43	18	400	2
22592092	A nucleoside- and ritonavir-sparing regimen containing atazanavir plus raltegravir in antiretroviral treatment-naÃ¯ve HIV-infected patients: SPARTAN study results.	Kozal MJ, Lupo S, DeJesus E, Molina JM, McDonald C, Raffi F, Benetucci J, Mancini M, Yang R, Wirtz V, Percival L, Zhang J, Zhu L, Arikan D, Farajallah A, Nguyen BY, Leavitt R, McGrath D, Lataillade M, The Spartan Study Team.	HIV Clin Trials	40.2	18	93	1
22592586	Time to initiate antiretroviral therapy between 4 weeks and 12 weeks of tuberculosis treatment in HIV-infected patients: results from the TIME study.	Manosuthi W, Mankatitham W, Lueangniyomkul A, Thongyen S, Likanonsakul S, Suwanvattana P, Thawornwan U, Suntisuklappon B, Nilkamhang S, Sungkanuparph S; TIME Study Team.	J Acquir Immune Defic Syndr	38	18	156	1
22594467	Onset time for pharmacologic premedication with clonidine as a nasal aerosol: a double-blind, placebo-controlled, randomized trial.	Larsson P, Eksborg S, Lonnqvist PA.	Paediatr Anaesth	23.3	999	12	4
22594651	The combined effect of very low nicotine content cigarettes, used as an adjunct to usual Quitline care (nicotine replacement therapy and behavioural support), on smoking cessation: a randomized controlled trial.	Walker N, Howe C, Bullen C, Grigg M, Glover M, McRobbie H, Laugesen M, Parag V, Whittaker R.	Addiction	41.8	18	1410	5
22594858	Thermotherapy. An alternative for the treatment of American cutaneous leishmaniasis.	LÃ³pez L, Robayo M, Vargas M, Velez ID.	Trials	999	999	292	12
22595104	Effect of platelet concentrate on quality of life after periradicular surgery: a randomized clinical study.	Del Fabbro M, Ceresoli V, Lolato A, Taschieri S.	J Endod	42.4	999	36	13
22595446	Efficacy of metal and plastic stents in unresectable comple- hilar cholangiocarcinoma: a randomized controlled trial.	Sangchan A, Kongkasame W, Pugkhem A, Jenwitheesuk K, Mairiang P.	Gastrointest Endosc	60	18	108	2
22595810	Effects of home versus hospital-based e-ercise training in chronic heart failure.	Cowie A, Thow MK, Granat MH, Mitchell SL.	Int J Cardiol	65.8	999	60	9
22595900	Therapeutic hypothermia for neonatal encephalopathy results in improved microstructure and metabolism in the deep gray nuclei.	Bonifacio SL, Saporta A, Glass HC, Lee P, Glidden DV, Ferriero DM, Barkovich AJ, -u D.	AJNR Am J Neuroradiol	0	999	41	16
22595983	Dyspnea, chest wall hyperinflation, and rib cage distortion in e-ercising patients with chronic obstructive pulmonary disease.	Bruni GI, Gigliotti F, Binazzi B, Romagnoli I, Duranti R, Scano G.	Med Sci Sports E-erc	68.1	999	16	10
22605573	Dietary fat types and 4-year cognitive change in community-dwelling older women.	Okereke OI, Rosner BA, Kim DH, Kang JH, Cook NR, Manson JE, Buring JE, Willett WC, Grodstein F.	Ann Neurol	66.5	65	6377	4
22607867	Long-term clinical and angiographic outcomes of diabetic patients after revascularization with early generation drug-eluting stents.	Billinger M, RÃ¤ber L, Hitz S, Stefanini GG, Pilgrim T, Stettler C, Zanchin T, Pulver C, PfÃ¤ffli N, Eberli F, Meier B, Kalesan B, Juni P, Windecker S.	Am Heart J	62.3	999	1012	9
22612884	Perioperative music or headsets to decrease an-iety.	Johnson B, Raymond S, Goss J.	J Perianesth Nurs	38.9	18	119	5
22613903	Narrow band imaging for detection of dysplasia in colitis: a randomized controlled trial.	Ignjatovic A, East JE, Subramanian V, Suzuki N, Guenther T, Palmer N, Bassett P, Ragunath K, Saunders BP.	Am J Gastroenterol	52.5	18	112	11
22615190	L-Carnitine plus cilostazol versus cilostazol alone for the treatment of claudication in patients with peripheral artery disease: a multicenter, randomized, double-blind, placebo-controlled trial.	Goldenberg NA, Krantz MJ, Hiatt WR.	Vasc Med	66.5	40	145	9
22617128	Effect of (Neo)adjuvant zoledronic acid on disease-free and overall survival in clinical stage II/III breast cancer.	Aft RL, Naughton M, Trinkaus K, Weilbaecher K.	Br J Cancer	49.6	999	119	2
22617578	Continuous compared with cyclic oral contraceptives for the treatment of primary dysmenorrhea: a randomized controlled trial.	Dmitrovic R, Kunselman AR, Legro RS.	Obstet Gynecol	20.9	18	35	14
22617632	Cognitive Behavioral Therapy increases pain-evoked activation of the prefrontal corte- in patients with fibromyalgia.	Jensen KB, Kosek E, Wicksell R, Kemani M, Olsson G, Merle JV, Kadetoff D, Ingvar M.	Pain	45.6	18	43	13
22617860	A 9-Week, Randomized, Double-Blind, Placebo-Controlled, Parallel-Group, Dose-Finding Study to Evaluate the Efficacy and Safety of Modafinil as Treatment for Adults With ADHD.	Arnold VK, Feifel D, Earl CQ, Yang R, Adler LA.	J Atten Disord	39.3	999	338	5
22617914	Good diagnostic performance of early migration as a predictor of late aseptic loosening of acetabular cups: results from ten years of follow-up with Roentgen stereophotogrammetric analysis (RSA).	Nieuwenhuijse MJ, Valstar ER, Kaptein BL, Nelissen RG.	J Bone Joint Surg Am	70	999	39	13
22617934	Simulated hip arthroscopy skills: learning curves with the lateral and supine patient positions: a randomized trial.	Pollard TC, Khan T, Price AJ, Gill HS, Glyn-Jones S, Rees JL.	J Bone Joint Surg Am	999	999	20	13
22621727	Evaluation of the incredible years" in Sweden: the transferability of an American parent-training program to Sweden."	A-berg U, Broberg AG.	Scand J Psychol	999	4	62	5
22622049	Immunogenicity and safety of 1 vs 2 doses of quadrivalent meningococcal conjugate vaccine in youth infected with human immunodeficiency virus.	Lujan-Zilbermann J, Warshaw MG, Williams PL, Spector SA, Decker MD, Abzug MJ, Heckman B, Manzella A, Kabat B, Jean-Philippe P, Nachman S, Siberry GK; International Maternal Pediatric Adolescent AIDS Clinical Trials Group P1065 Protocol Team.	J Pediatr	18	11	286	1
22622147	A randomized, phase II trial of standard triweekly compared with dose-dense biweekly capecitabine plus o-aliplatin plus bevacizumab as first-line treatment for metastatic colorectal cancer: -ELO--A-DVS (dense versus standard).	Hurwitz H, Mitchell EP, Cartwright T, Kwok A, Hu S, McKenna E, Patt YZ.	Oncologist	60.7	18	435	2
22622364	Acute tryptophan depletion in accordance with body weight: influ- of amino acids across the blood-brain barrier.	Dingerkus VL, Gaber TJ, Helmbold K, Bubenzer S, Eisert A, SÃ¡nchez CL, Zepf FD.	J Neural Transm	25.3	999	24	5
22622405	Safety and pharmacokinetics of an anti-PcrV PEGylated monoclonal antibody fragment in mechanically ventilated patients colonized with Pseudomonas aeruginosa: a randomized,double-blind, placebo-controlled trial.	Francois B, Luyt CE, Dugard A, Wolff M, Diehl JL, Jaber S, Forel JM, Garot D, Kipnis E, Mebazaa A, Misset B, Andremont A, Ploy MC, Jacobs A, Yarranton G, Pearce T, Fagon JY, Chastre J.	Crit Care Med	63	18	41	1
22622651	Placement of peripherally inserted central catheters in children guided by ultrasound: a prospective randomized, and controlled trial.	de Carvalho Onofre PS, da Luz Goncalves Pedreira M, Peterlini MA.	Pediatr Crit Care Med	2.9	0	42	9
22622909	Occipital nerve stimulation for chronic migraine: a randomized trial.	Serra G, Marchioretto F.	Pain Physician	46	18	34	7
22623206	Robotic gait training is not superior to conventional treadmill training in parkinson disease: a single-blind randomized controlled trial.	Carda S, Invernizzi M, Baricich A, Comi C, Croquelois A, Cisari C.	Neurorehabil Neural Repair	67.4	999	30	6
22623482	Modulation of soleus H refle- by spinal DC stimulation in humans.	Lamy JC, Ho C, Badel A, Arrigo RT, Boakye M.	J Neurophysiol	31.8	999	22	6
22624299	Comparative intake of white- versus orange-colored maize by Zambian children in the conte-t of promotion of biofortified maize.	Nuss ET, Arscott SA, Bresnahan K, Pi-ley KV, Rocheford T, Hotz C, Siamusantu W, Chileshe J, Tanumihardjo SA.	Food Nutr Bull	4.5	3	189	4
22624605	When less is more: evidence for a facilitative cathodal tDCS effect in attentional abilities.	Weiss M, Lavidor M.	J Cogn Neurosci	26.6	999	50	5
22626743	Remote monitoring reduces healthcare use and improves quality of care in heart failure patients with implantable defibrillators: the evolution of management strategies of heart failure patients with implantable defibrillators (EVOLVO) study.	Landolina M, Perego GB, Lunati M, Curnis A, Guenzati G, Vicentini A, Parati G, Borghi G, Zanaboni P, Valsecchi S, Marzegalli M.	Circulation	67.5	999	200	9
22627597	Low contrast agent and radiation dose protocol for hepatic dynamic CT of thin adults at 256-detector row CT: effect of low tube voltage and hybrid iterative reconstruction algorithm on image quality.	Nakaura T, Nakamura S, Maruyama N, Funama Y, Awai K, Harada K, Uemura S, Yamashita Y.	Radiology	67.8	999	74	11
22627991	Relation between change in blood pressure in acute stroke and risk of early adverse events and poor outcome.	Sandset EC, Murray GD, Bath PM, Kjeldsen SE, Berge E; Scandinavian Candesartan Acute Stroke Trial (SCAST) Study Group.	Stroke	71	18	2029	6
22628062	Bioequivalence of two formulations of escitalopram.	Almeida S, Pedroso P, Filipe A, Neves RI, Tanguay M, Torns A.	Arzneimittelforschung	35	20	24	22
22632584	Lumbar lordosis rehabilitation for pain and lumbar segmental motion in chronic mechanical low back pain: a randomized trial.	Diab AA, Moustafa IM.	J Manipulative Physiol Ther	46.1	999	80	13
22633601	A low-fat dietary pattern and risk of metabolic syndrome in postmenopausal women: the Women's Health Initiative.	Neuhouser ML, Howard B, Lu J, Tinker LF, Van Horn L, Caan B, Rohan T, Stefanick ML, Thomson CA.	Metabolism	61.7	50	2818	4
22633825	Magnesium for aneurysmal subarachnoid haemorrhage (MASH-2): a randomised placebo-controlled trial.	Dorhout Mees SM, Algra A, Vandertop WP, van Kooten F, Kuijsten HA, Boiten J, van Oostenbrugge RJ, Al-Shahi Salman R, Lavados PM, Rinkel GJ, van den Bergh WM; MASH-2 Study Group.	Lancet	57	18	1203	6
22634184	Vicriviroc plus optimized background therapy for treatment-e-perienced subjects with CCR5 HIV-1 infection: final results of two randomized phase III trials.	Caseiro MM, Nelson M, Diaz RS, Gathe J, de Andrade Neto JL, Slim J, Solano A, Netto EM, Mak C, Shen J, Greaves W, Dunkle LM, Vilchez RA, Zeinecker J.	J Infect	43	999	721	1
22637204	NeoCart, an autologous cartilage tissue implant, compared with microfracture for treatment of distal femoral cartilage lesions: an FDA phase-II prospective, randomized clinical trial after two years.	Crawford DC, DeBerardino TM, Williams RJ 3rd.	J Bone Joint Surg Am	40	18	30	13
22639845	Coronally advanced flap with and without connective tissue graft for the treatment of single ma-illary gingival recession with loss of inter-dental attachment. A randomized controlled clinical trial.	Cairo F, Cortellini P, Tonetti M, Nieri M, Mervelt J, Cincinelli S, Pini-Prato G.	J Clin Periodontol	45.9	18	15	22
22640000	Do combined alternating sessions of 1540 nm nonablative fractional laser and percutaneous collagen induction with trichloroacetic acid 20% show better results than each individual modality in the treatment of atrophic acne scars? A randomized controlled trial.	Leheta TM, Abdel Hay RM, Hegazy RA, El Garem YF.	J Dermatolog Treat	31.9	999	39	12
22642473	Conversion from cyclosporine to everolimus at 4.5 months posttransplant: 3-year results from the randomized ZEUS study.	Budde K, Lehner F, Sommerer C, Arns W, Reinke P, Eisenberger U, Wuthrich RP, Scheidl S, May C, Paulus EM, Muhlfeld A, Wolters HH, Pressmar K, Stahl R, Witzke O; ZEUS Study Investigators.	Am J Transplant	46.9	18	264	20
22642686	Strength training reduces intracortical inhibition.	Weier AT, Pearce AJ, Kidgell DJ.	Acta Physiol (O-f)	21	18	12	6
22642755	Changes in body weight and food choice in those attempting smoking cessation: a cluster randomised controlled trial.	Leslie WS, Koshy PR, Mackenzie M, Murray HM, Boyle S, Lean ME, Walker A, Hankey CR.	BMC Public Health	50	999	138	20
22643350	Efficacy of entecavir with or without tenofovir disopro-il fumarate for nucleos(t)ide-naÃ¯ve patients with chronic hepatitis B.	Lok AS, Trinh H, Carosi G, Akarca US, Gadano A, Habersetzer F, Sievert W, Wong D, Lovegren M, Cohen D, Llamoso C.	Gastroenterology	39.5	16	379	1
22644587	Multisystemic therapy compared to telephone support for youth with poorly controlled diabetes: findings from a randomized controlled trial.	Ellis DA, Naar-King S, Chen -, Moltz K, Cunningham PB, Idalski-Carcone A.	Ann Behav Med	14.2	10	146	4
22646315	Effects of immediate feedback on learning auditory perceptual voice quality evaluation.	Chan KM, Li M, Law TY, Yiu EM.	Int J Speech Lang Pathol	21.2	999	30	5
22646630	Preoperative chemoradiotherapy for esophageal or junctional cancer.	van Hagen P, Hulshof MC, van Lanschot JJ, Steyerberg EW, van Berge Henegouwen MI, Wijnhoven BP, Richel DJ, Nieuwenhuijzen GA, Hospers GA, Bonenkamp JJ, Cuesta MA, Blaisse RJ, Busch OR, ten Kate FJ, Creemers GJ, Punt CJ, Plukker JT, Verheul HM, Spillenaar Bilgen EJ, van Dekken H, van der Sangen MJ, Rozema T, et al.	N Engl J Med	60	18	366	2
22646975	Effects of guided imagery with rela-ation training on an-iety and quality of life among patients with inflammatory bowel disease.	Mizrahi MC, Reicher-Atir R, Levy S, Haramati S, Wengrower D, Israeli E, Goldin E.	Psychol Health	35.6	18	39	5
22647278	Effects of jumping e-ercise on ma-imum ground reaction force and bone in 8- to 12-year-old boys and girls: a 9-month randomized controlled trial.	Anliker E, Dick C, Rawer R, Toigo M.	J Musculoskelet Neuronal Interact	10.7	8	45	13
22647280	Chair rising e-ercise is more effective than one-leg standing e-ercise in improving dynamic body balance: a randomized controlled trial.	Yamashita F, Iwamoto J, Osugi T, Yamazaki M, Takakuwa M.	J Musculoskelet Neuronal Interact	66.6	50	30	13
22648253	A prospective study on different methods for the treatment of choroidal neovascularization. The efficacy of verteporfin photodynamic therapy, intravitreal bevacizumab and transpupillary thermotherapy in patients with neovascular age-related macular degeneration.	Nowak MS, Jurowski P, Grzybowski A, GoÅ? R, Pastuszka M, Kapica A, Å?migielski J.	Med Sci Monit	74.6	999	426	7
22648471	The role of attentional focus in plyometric training.	Makaruk H, Porter JM, Czaplicki A, Sadowski J, Sacewicz T.	J Sports Med Phys Fitness	22.3	999	36	5
22650799	Pharmacokinetics and pharmacodynamics of intravenous de-medetomidine in healthy Korean subjects.	Lee S, Kim BH, Lim K, Stalker D, Wisemandle W, Shin SG, Jang IJ, Yu KS.	J Clin Pharm Ther	27	18	24	22
22651946	Effect of parenteral hydration therapy based on the Japanese national clinical guideline on quality of life, discomfort, and symptom intensity in patients with advanced cancer.	Yamaguchi T, Morita T, Shinjo T, Inoue S, Takigawa C, Aruga E, Tani K, Hara T, Tamura Y, Suga A, Adachi S, Katayama H, Osaka I, Saito Y, Nakajima N, Higashiguchi T, Hayashi T, Okabe T, Kohara H, Tamaki T, Chinone Y, Aragane H, et al.	J Pain Symptom Manage	71.4	20	161	2
22652582	Long-term comparative immunogenicity of protein conjugate and free polysaccharide pneumococcal vaccines in chronic obstructive pulmonary disease.	Dransfield MT, Harnden S, Burton RL, Albert RK, Bailey WC, Casaburi R, Connett J, Cooper JA, Criner GJ, Curtis JL, Han MK, Make B, Marchetti N, Martinez FJ, McEvoy C, Nahm MH, Niewoehner DE, Porszasz J, Reilly J, Scanlon PD, Scharf SM, Sciurba FC, et al.	Clin Infect Dis	63.5	40	181	10
22654944	Outcomes and moderators of a preventive school-based mental health intervention for children affected by war in Sri Lanka: a cluster randomized trial.	Tol WA, Komproe IH, Jordans MJ, Vallipuram A, Sipsma H, Sivayokan S, Macy RD, DE Jong JT.	World Psychiatry	11	999	399	5
22656678	A comparative study of non-lipid nanoemulsion of propofol with solutol and propofol emulsion with lecithin.	Rodrigues TA, Ale-andrino RA, Kanczuk ME, Gozzani JL, Mathias LA.	Rev Bras Anestesiol	44.5	18	150	11
22658231	Is femoral nerve block necessary during total knee arthroplasty?: a randomized controlled trial.	Widmer BJ, Scholes CJ, Pattullo GG, Oussedik SI, Parker DA, Coolican MR.	J Arthroplasty	70.8	18	54	13
22658895	A randomized controlled trial of an intensive insulin regimen in patients with hyperglycemic acute lymphoblastic leukemia.	Vu K, Busaidy N, Cabanillas ME, Konopleva M, Faderl S, Thomas DA, O'Brien S, Broglio K, Ensor J, Escalante C, Andreeff M, Kantarjian H, Lavis V, Yeung SC.	Clin Lymphoma Myeloma Leuk	51.9	999	51	2
22659994	A combination of galantamine and memantine modifies cognitive function in subjects with amnestic MCI.	Peters O, Lorenz D, Fesche A, Schmidtke K, Hull M, Perneczky R, Ruther E, Moller HJ, Jessen F, Maier W, Kornhuber J, Jahn H, Luckhaus C, Gertz HJ, Schroder J, Pantel J, Teipel S, Wellek S, Frolich L, Heuser I.	J Nutr Health Aging	67.4	999	232	5
22660367	The usefulness of bladder reconditioning before indwelling urethral catheter removal from stroke patients.	Moon HJ, Chun MH, Lee SJ, Kim BR.	Am J Phys Med Rehabil	63	999	60	6
22665264	Measuring endogenous changes in serotonergic neurotransmission in humans: a [11C]CUMI-101 PET challenge study.	Selvaraj S, Turkheimer F, Rosso L, Faulkner P, Mouchlianitis E, Roiser JP, McGuire P, Cowen PJ, Howes O.	Mol Psychiatry	50.9	999	13	5
22665339	Five-year follow-up results of a randomized controlled trial comparing bipolar plasmakinetic and monopolar transurethral resection of the prostate.	-ie CY, Zhu GB, Wang -H, Liu -B.	Yonsei Med J	67.4	45	220	14
22670572	Can deficits in empathy after head injury be improved by compassionate imagery?	O'Neill M, McMillan TM.	Neuropsychol Rehabil	42.2	18	24	5
22670617	Dandruff/seborrhoeic dermatitis is characterized by an inflammatory genomic signature and possible immune dysfunction: transcriptional analysis of the condition and treatment effects of zinc pyrithione.	Mills KJ, Hu P, Henry J, Tamura M, Tiesman JP, -u J.	Br J Dermatol	999	18	45	12
22672732	The effects of respiratory training for chronic obstructive pulmonary disease patients: a randomised clinical trial.	Lin WC, Yuan SC, Chien JY, Weng SC, Chou MC, Kuo HW.	J Clin Nurs	68.7	999	40	10
22672993	Relevance of assisted hatching in an oocyte donation programme using egg cryobanking: a prospective randomised study.	Figueira Rde C, Braga DP, Setti AS, Iaconelli A Jr, Borges E Jr.	Eur J Obstet Gynecol Reprod Biol	37.4	999	60	14
22674243	Triamcinolone acetonide vs procaine hydrochloride injection in the management of carpal tunnel syndrome: randomized placebo-controlled study.	KaradaÅ? Ã?, Tok F, Akarsu S, Tekin L, Balaban B.	J Rehabil Med	47.2	18	57	6
22676245	Randomized phase II study of three doses of oral TAS-108 in postmenopausal patients with metastatic breast cancer.	Inaji H, Iwata H, Nakayama T, Yamamoto N, Sato Y, Tokuda Y, Aogi K, Saji S, Watanabe K, Saito T, Yoshida M, Sato N, Saeki T, Takatsuka Y, Kuranami M, Yamashita H, Kikuchi A, Tabei T, Ikeda T, Noguchi S.	Cancer Sci	62	20	97	2
22678087	Electrocardiographic changes predict angiographic vasospasm after aneurysmal subarachnoid hemorrhage.	Ibrahim GM, Macdonald RL.	Stroke	51	999	413	6
22678318	Comparison of intracorporeal knot-tying suture (polyglactin) and titanium endoclips in laparoscopic appendiceal stump closure: a prospective randomized study.	Ates M, Dirican A, Ince V, Ara C, Isik B, Yilmaz S.	Surg Laparosc Endosc Percutan Tech	28.8	999	61	11
22681743	Improving attendance for cardiovascular risk assessment in Australian general practice: an RCT of a monetary incentive for patients.	Stocks N, Allan J, Frank O, Williams S, Ryan P.	BMC Fam Pract	999	40	56	9
22682340	Haematocrit is invalid for estimating red cell volume: a prospective study in male volunteers.	Jacob M, Annaheim S, Boutellier U, Hinske C, Rehm M, Breymann C, Krafft A.	Blood Transfus	32.3	18	46	3
22682555	Ramipril sensitizes platelets to nitric o-ide: implications for therapy in high-risk patients.	Willoughby SR, Rajendran S, Chan WP, Procter N, Leslie S, Liberts EA, Heresztyn T, Chirkov YY, Horowitz JD.	J Am Coll Cardiol	66.8	50	119	9
22682610	Risk of falls in older people during fast-walking--the TASCOG study.	Callisaya ML, Blizzard L, McGinley JL, Srikanth VK.	Gait Posture	72.6	60	155	13
22683226	Efficacy and tolerability of zonisamide versus controlled-release carbamazepine for newly diagnosed partial epilepsy: a phase 3, randomised, double-blind, non-inferiority trial.	Baulac M, Brodie MJ, Patten A, Segieth J, Giorgi L.	Lancet Neurol	36.3	18	581	6
22683707	Effect of transversus abdominis plane block with and without clonidine on post-cesarean delivery wound hyperalgesia and pain.	Bollag L, Richebe P, Siaulys M, Ortner CM, Gofeld M, Landau R.	Reg Anesth Pain Med	30.6	18	81	15
22686416	Basal insulin and cardiovascular and other outcomes in dysglycemia.	ORIGIN Trial Investigators, Gerstein HC, Bosch J, Dagenais GR, DÃ­az R, Jung H, Maggioni AP, Pogue J, Probstfield J, Ramachandran A, Riddle MC, Ryden LE, Yusuf S.	N Engl J Med	63.5	50	12537	9
22687177	Randomized trial comparing intraoral ultrasound to landmark-based needle aspiration in patients with suspected peritonsillar abscess.	Costantino TG, Satz WA, Dehnkamp W, Goett H.	Acad Emerg Med	27	18	28	10
22687235	Continuity in different care modes and its relationship to quality of life: a randomised controlled trial in patients with COPD.	Uijen AA, Bischoff EW, Schellevis FG, Bor HH, van den Bosch WJ, Schers HJ.	Br J Gen Pract	64.4	35	180	10
22687509	In vitro activity and microbiological efficacy of tedizolid (TR-700) against Gram-positive clinical isolates from a phase 2 study of oral tedizolid phosphate (TR-701) in patients with complicated skin and skin structure infections.	Prokocimer P, Bien P, Deanda C, Pillar CM, Bartizal K.	Antimicrob Agents Chemother	999	18	188	12
22687642	The effect of pioglitazone treatment on 15-epi-lipo-in A4 levels in patients with type 2 diabetes.	Gutierrez AD, Sathyanarayana P, Konduru S, Ye Y, Birnbaum Y, Bajaj M.	Atherosclerosis	56	21	25	4
22688312	Clopidogrel trial in patients with elective percutaneous coronary intervention for stable angina and old myocardial infarction (CLEAN).	Isshiki T, Kimura T, Ueno T, Nakamura M, Igarashi K, Yokoi H, Kobayashi M, Ikari Y.	Int Heart J	68.3	20	1232	9
22689677	A randomized phase II study to evaluate tacrolimus in combination with sirolimus or methotre-ate after allogeneic hematopoietic cell transplantation.	Pidala J, Kim J, Jim H, Kharfan-Dabaja MA, Nishihori T, Fernandez HF, Tomblyn M, Perez L, Perkins J, -u M, Janssen WE, Veerapathran A, Betts BC, Locke FL, Ayala E, Field T, Ochoa L, Alsina M, Anasetti C.	Haematologica	48.5	16	74	20
22689695	Endogenous se- hormone changes in postmenopausal women in the diabetes prevention program.	Kim C, Kong S, Laughlin GA, Golden SH, Mather KJ, Nan B, Edelstein SL, Randolph JF Jr, Labrie F, Buschur E, Barrett-Connor E.	J Clin Endocrinol Metab	58.7	25	382	4
22689805	Multicenter, randomized, open-label, phase III trial of decitabine versus patient choice, with physician advice, of either supportive care or low-dose cytarabine for the treatment of older patients with newly diagnosed acute myeloid leukemia.	Kantarjian HM, Thomas -G, Dmoszynska A, Wierzbowska A, Mazur G, Mayer J, Gau JP, Chou WC, Buckstein R, Cermak J, Kuo CY, Oriol A, Ravandi F, Faderl S, Delaunay J, LysÃ¡k D, Minden M, Arthur C.	J Clin Oncol	73	65	485	2
22690326	A Randomized Multicenter Study Comparing a Tacrolimus-Based Protocol with and without Steroids in HCV-Positive Liver Allograft Recipients.	Neumann U, Samuel D, TruneÄka P, Gugenheim J, Gerunda GE, Friman S.	J Transplant	54.2	18	135	1
22691654	Four treatment strategies for comple- regional pain syndrome type 1.	Lee SK, Yang DS, Lee JW, Choy WS.	Orthopedics	48	999	59	13
22695473	Efficacy of disulfiram and Twelve Step Facilitation in cocaine-dependent individuals maintained on methadone: a randomized placebo-controlled trial.	Carroll KM, Nich C, Shi JM, Eagan D, Ball SA.	Drug Alcohol Depend	38.3	999	112	5
22696266	Early survival of comatose patients after severe traumatic brain injury with the dual cannabinoid CB1/CB2 receptor agonist KN38-7271: a randomized, double-blind, placebo-controlled phase II trial.	Firsching R, Piek J, Skalej M, Rohde V, Schmidt U, Striggow F; KN38-7271 Study Group.	J Neurol Surg A Cent Eur Neurosurg	36.9	999	97	6
22696825	Effects of maternal left lateral position and rest on amniotic fluid inde-: a prospective clinical study.	Ulker K, Temur I, Karaca M, Ersoz M, Volkan I, Gul A.	J Reprod Med	26.4	999	152	15
22698066	A randomised controlled trial comparing sugammade- and neostigmine at different depths of neuromuscular blockade in patients undergoing laparoscopic surgery.	Geldner G, Niskanen M, Laurila P, Mizikov V, Hubler M, Beck G, Rietbergen H, Nicolayenko E.	Anaesthesia	51	18	133	11
22698766	Effect of high-oleic canola and fla-seed oils on energy e-penditure and body composition in hypercholesterolemic subjects.	Gillingham LG, Robinson KS, Jones PJ.	Metabolism	48.2	18	34	4
22699098	Randomized controlled trial assessing participation and quality of life in a supported speed treadmill training e-ercise program vs. a strengthening program for children with cerebral palsy.	Gates PE, Banks D, Johnston TE, Campbell SR, Gaughan JP, Ross SA, Engsberg JR, Tucker C.	J Pediatr Rehabil Med	9.5	6	26	6
22699129	Perioperative intravenous lidocaine decreases the incidence of persistent pain after breast surgery.	Grigoras A, Lee P, Sattar F, Shorten G.	Clin J Pain	56.4	999	36	2
22700528	Intensive versus subcutaneous insulin in patients with hyperacute stroke: results from the randomized INSULINFARCT trial.	Rosso C, Corvol JC, Pires C, Crozier S, Attal Y, Jacqueminet S, Deltour S, Multlu G, Leger A, Meresse I, Payan C, Dormont D, Samson Y.	Stroke	73.2	999	176	6
22700717	Effects of lipid-lowering treatment on platelet reactivity and platelet-leukocyte aggregation in diabetic patients without and with chronic kidney disease: a randomized trial.	Almquist T, Jacobson SH, Lins PE, Farndale RW, Hjemdahl P.	Nephrol Dial Transplant	65.5	18	39	4
22701203	Pre-treatment with intravenous granisetron to alleviate pain on propofol injection: A double-blind, randomized, controlled trial.	Ahmed A, Sengupta S, Das T, Rudra A, Iqbal A.	Indian J Anaesth	30.5	18	82	22
22701683	Effects of valacyclovir on markers of disease progression in postpartum women co-infected with HIV-1 and herpes simple- virus-2.	Ro-by AC, Drake AL, Ongecha-Owuor F, Kiarie JN, Richardson B, Matemo DN, Overbaugh J, Emery S, John-Stewart GC, Wald A, Farquhar C.	PLoS One	25	18	146	1
22703478	Effect of carvedilol and nebivolol on o-idative stress-related parameters and endothelial function in patients with essential hypertension.	Zepeda RJ, Castillo R, Rodrigo R, Prieto JC, Aramburu I, Brugere S, Galdames K, Noriega V, Miranda HF.	Basic Clin Pharmacol To-icol	45.3	30	44	9
22703579	The inclusion of a partial meal replacement with or without inulin to a calorie restricted diet contributes to reach recommended intakes of micronutrients and decrease plasma triglycerides: a randomized clinical trial in obese Me-ican women.	Tovar AR, CaamaÃ±o Mdel C, Garcia-Padilla S, GarcÃ­a OP, Duarte MA, Rosado JL.	Nutr J	33.4	999	110	4
22703720	Outcomes, moderators, and mediators of empathic-emotion recognition training for comple- conduct problems in childhood.	Dadds MR, Cauchi AJ, Wimalaweera S, Hawes DJ, Brennan J.	Psychiatry Res	10.5	6	196	5
22703794	Topical silver sulfadiazine vs collagenase ointment for the treatment of partial thickness burns in children: a prospective randomized trial.	Ostlie DJ, Juang D, Aguayo P, Pettiford-Cunningham JP, Erkmann EA, Rash DE, Sharp SW, Sharp RJ, St Peter SD.	J Pediatr Surg	5	0.2	100	12
22704744	Graphic warning labels in cigarette advertisements: recall and viewing patterns.	Strasser AA, Tang KZ, Romer D, Jepson C, Cappella JN.	Am J Prev Med	30.5	21	200	21
22704765	Transumbilical versus transvaginal retrieval of surgical specimens at laparoscopy: a randomized trial.	Ghezzi F, Cromi A, Uccella S, Bogani G, Serati M, Bolis P.	Am J Obstet Gynecol	45.2	999	66	14
22705346	Visual function after correction of distance refractive error with ready-made and custom spectacles: a randomized clinical trial.	Brady CJ, Villanti AC, Gandhi M, Friedman DS, Keay L.	Ophthalmology	30.4	18	363	7
22706128	Autologous e-panded adipose-derived stem cells for the treatment of comple- cryptoglandular perianal fistulas: a phase III randomized clinical trial (FATT 1: fistula Advanced Therapy Trial 1) and long-term evaluation.	Herreros MD, Garcia-Arranz M, Guadalajara H, De-La-Quintana P, Garcia-Olmo D; FATT Collaborative Group.	Dis Colon Rectum	49.3	999	183	11
22706571	Effect of intravenous vitamin C on cytokine activation and o-idative stress in end-stage renal disease patients receiving intravenous iron sucrose.	Conner TA, McQuade C, Olp J, Pai AB.	Biometals	54.3	18	17	14
22708521	A randomized controlled trial evaluating the impact of the Supervising for Home Safety program on parent appraisals of injury risk and need to actively supervise.	Morrongiello BA, Sandomierski M, Zdzieborski D, McCollam H.	Health Psychol	999	999	186	5
22708640	Nebivolol and metoprolol: long-term effects on inflammation and o-idative stress in essential hypertension.	Serg M, Kampus P, Kals J, Zagura M, Zilmer M, Zilmer K, Kullisaar T, Eha J.	Scand J Clin Lab Invest	46.5	30	80	9
22709278	Effects of introducing a voluntary virtual patient module to a basic life support with an automated e-ternal defibrillator course: a randomised trial.	Kononowicz AA, Krawczyk P, Cebula G, Dembkowska M, Drab E, FrÄ?czek B, StachoÅ? AJ, Andres J.	BMC Med Educ	19	999	226	19
22709778	Personalized diet management can optimize compliance to a high-fiber, high-water diet in children with refractory functional constipation.	Karagiozoglou-Lampoudi T, Daskalou E, Agakidis C, Savvidou A, Apostolou A, Vlahavas G.	J Acad Nutr Diet	4.4	999	86	11
22710926	Evaluation of an intervention to promote protective infant feeding practices to prevent childhood obesity: outcomes of the NOURISH RCT at 14 months of age and 6 months post the first of two intervention modules.	Daniels LA, Mallan KM, Battistutta D, Nicholson JM, Perry R, Magarey A.	Int J Obes (Lond)	30	999	698	5
22712503	The effectiveness of a group-based acceptance and commitment additive therapy on rehabilitation of female outpatients with chronic headache: preliminary findings reducing 3 dimensions of headache impact.	Mo'tamedi H, Rezaiemaram P, Tavallaie A.	Headache	36	19	30	6
22715372	A randomized, double blind, placebo-controlled trial of pioglitazone in combination with riluzole in amyotrophic lateral sclerosis.	Dupuis L, Dengler R, Heneka MT, Meyer T, Zierz S, Kassubek J, Fischer W, Steiner F, Lindauer E, Otto M, Dreyhaupt J, Grehl T, Hermann A, Winkler AS, Bogdahn U, Benecke R, Schrank B, Wessig C, Grosskreutz J, Ludolph AC; GERP ALS Study Group.	PLoS One	59	999	218	6
22716974	A midurethral sling to reduce incontinence after vaginal prolapse repair.	Wei JT, Nygaard I, Richter HE, Nager CW, Barber MD, Kenton K, Amundsen CL, Schaffer J, Meikle SF, Spino C; Pelvic Floor Disorders Network.	N Engl J Med	62.8	999	337	14
22716999	Short-term SSRI treatment normalises amygdala hyperactivity in depressed patients.	Godlewska BR, Norbury R, Selvaraj S, Cowen PJ, Harmer CJ.	Psychol Med	32.1	999	59	5
22718559	Does an informational film increase women's possibility to make an informed choice about second trimester ultrasound?	Ohman SG, Bjorklund U, Marsk A.	Prenat Diagn	32.2	999	390	15
22718810	The combination of OLmesartan and a CAlcium channel blocker (azelnidipine) or candesartan and a calcium channel blocker (amlodipine) in type 2 diabetic hypertensive patients: the OLCA study.	Daikuhara H, Kikuchi F, Ishida T.	Diab Vasc Dis Res	59.6	999	236	4
22719796	Real-time pharmacy surveillance and clinical decision support to reduce adverse drug events in acute kidney injury: a randomized, controlled trial.	McCoy AB, Co- ZL, Neal EB, Waitman LR, Peterson NB, Bhave G, Siew ED, Danciu I, Lewis JB, Peterson JF.	Appl Clin Inform	59.5	999	396	14
22721929	Effect of chelation therapy on progressive diabetic nephropathy in patients with type 2 diabetes and high-normal body lead burdens.	Chen KH, Lin JL, Lin-Tan DT, Hsu HH, Hsu CW, Hsu KH, Yen TH.	Am J Kidney Dis	58.1	30	50	14
22722637	Five-year follow-up study of a kidney-tonifying herbal Fufang for prevention of postmenopausal osteoporosis and fragility fractures.	Deng WM, Zhang P, Huang H, Shen YG, Yang QH, Cui WL, He YS, Wei S, Ye Z, Liu F, Qin L.	J Bone Miner Metab	61.8	47	155	4
22722664	The use of the development and well-being assessment (DAWBA) in clinical practice: a randomized trial.	Aebi M, Kuhn C, Metzke CW, Stringaris A, Goodman R, Steinhausen HC.	Eur Child Adolesc Psychiatry	10.5	5	270	5
22723310	A randomized, placebo-controlled study of the effects of denosumab for the treatment of men with low bone mineral density.	Orwoll E, TeglbjÃ¦rg CS, Langdahl BL, Chapurlat R, Czerwinski E, Kendler DL, Reginster JY, Kivitz A, Lewiecki EM, Miller PD, Bolognese MA, McClung MR, Bone HG, Ljunggren Ã?, Abrahamsen B, Gruntmanis U, Yang YC, Wagman RB, Siddhanti S, Grauer A, Hall JW, Boonen S.	J Clin Endocrinol Metab	65	30	242	4
22723581	Liver fat is reduced by an isoenergetic MUFA diet in a controlled randomized study in type 2 diabetic patients.	Bozzetto L, Prinster A, Annuzzi G, Costagliola L, Mangione A, Vitelli A, Mazzarella R, Longobardo M, Mancini M, Vigorito C, Riccardi G, Rivellese AA.	Diabetes Care	58.8	35	36	4
22723853	Echocardiographic evidence for valvular to-icity of benfluore-: a double-blind randomised trial in patients with type 2 diabetes mellitus.	Derumeau- G, Ernande L, Serusclat A, Servan E, Bruckert E, Rousset H, Senn S, Van Gaal L, Picandet B, Gavini F, Moulin P; REGULATE trial investigators.	PLoS One	59.1	35	846	4
22726220	Effect of anti-IL-1Î² antibody (canakinumab) on insulin secretion rates in impaired glucose tolerance or type 2 diabetes: results of a randomized, placebo-controlled trial.	Rissanen A, Howard CP, Botha J, Thuren T; for the Global Investigators.	Diabetes Obes Metab	57.4	18	246	4
22727160	Salmeterol and fluticasone in young children with multiple-trigger wheeze.	MÃ¤kelÃ¤ MJ, Malmberg LP, Csonka P, Klemola T, Kajosaari M, Pelkonen AS.	Ann Allergy Asthma Immunol	5.6	4	101	10
22727475	Atrioventricular delay programming in cardiac resynchronization therapy devices: fi-ed or adaptive? A randomized monocenter trial.	Schueler M, Voss F, Bauer A, Thomas D, Kelemen K, Katus HA, Becker R.	J Electrocardiol	60	999	100	9
22728005	Effect of late revascularization of a totally occluded coronary artery after myocardial infarction on mortality rates in patients with renal impairment.	Hastings RS, Hochman JS, Dzavik V, Lamas GA, Forman SA, Schiele F, Michalis LK, Nikas D, Jaroch J, Reynolds HR.	Am J Cardiol	58.7	999	2160	9
22728230	Sclerostin levels and bone turnover markers in adolescents with anore-ia nervosa and healthy adolescent girls.	Faje AT, Fazeli PK, Katzman DK, Miller KK, Breggia A, Rosen CJ, Mendes N, Klibanski A, Misra M.	Bone	16.3	13	69	5
22729297	Perioperative intravenous corticosteroids reduce incidence of atrial fibrillation following cardiac surgery: a randomized study.	Abbaszadeh M, Khan ZH, Mehrani F, Jahanmehr H.	Rev Bras Cir Cardiovasc	59.9	999	185	9
22729307	Sub-yphoid pleural drain confers lesser impairment in respiratory muscle strength, o-ygenation and lower chest pain after off-pump coronary artery bypass grafting: a randomized controlled trial.	Cancio AS, Guizilini S, Bolzan DW, Dauar RB, Succi JE, de Paola AA, Carvalho AC, Gomes WJ.	Rev Bras Cir Cardiovasc	55.7	35	40	9
22731240	De-amethasone versus ondansetron in combination with de-amethasone for the prophyla-is of postoperative vomiting in pediatric outpatients: a double-blind, randomized, placebo-controlled clinical trial.	de Orange FA, Marques J, Flores M, Borges PS.	Paediatr Anaesth	4.8	1	129	22
22731889	Internet-delivered attention bias modification training in individuals with social an-iety disorder--a double blind randomized controlled trial.	Carlbring P, Apelstrand M, Sehlin H, Amir N, Rousseau A, Hofmann SG, Andersson G.	BMC Psychiatry	36.5	18	79	5
22732113	Lung isolation in the morbidly obese patient: a comparison of a left-sided double-lumen tracheal tube with the ArndtÂ® wire-guided blocker.	Campos JH, Hallam EA, Ueda K.	Br J Anaesth	999	999	50	22
22732469	Effect of cobicistat on glomerular filtration rate in subjects with normal and impaired renal function.	German P, Liu HC, Szwarcberg J, Hepner M, Andrews J, Kearney BP, Mathias A.	J Acquir Immune Defic Syndr	33.3	999	36	14
22732975	Lactobacillus plantarum CECT7315 and CECT7316 stimulate immunoglobulin production after influenza vaccination in elderly.	Bosch M, Mendez M, Perez M, Farran A, Fuentes MC, CuÃ±e J.	Nutr Hosp	999	65	60	1
22736463	Treating oral mucositis with a supersaturated calcium phosphate rinse: comparison with control in patients undergoing allogeneic hematopoietic stem cell transplantation.	Markiewicz M, Dzierzak-Mietla M, Frankiewicz A, Zielinska P, Koclega A, Kruszelnicka M, Kyrcz-Krzemien S.	Support Care Cancer	37	999	40	2
22736737	Targeted intervention improves knowledge but not self-care or readmissions in heart failure patients with mild cognitive impairment.	Davis KK, Mintzer M, Dennison Himmelfarb CR, Hayat MJ, Rotman S, Allen J.	Eur J Heart Fail	58.5	21	125	9
22738270	Acupuncture regulates the glucose metabolism in cerebral functional regions in chronic stage ischemic stroke patients--a PET-CT cerebral functional imaging study.	Huang Y, Tang C, Wang S, Lu Y, Shen W, Yang J, Chen J, Lin R, Cui S, -iao H, Qu S, Lai -, Shan B.	BMC Neurosci	56.1	40	45	6
22738796	The efficacy of acupuncture in human pain models: a randomized, controlled, double-blinded study.	Rebhorn C, Breimhorst M, Buniatyan D, Vogel C, Birklein F, Eberle T.	Pain	24.8	999	50	6
22739693	Randomized, controlled trial of a 13-valent pneumococcal conjugate vaccine administered concomitantly with an influenza vaccine in healthy adults.	Frenck RW Jr, Gurtman A, Rubino J, Smith W, van Cleeff M, Jayawardene D, Giardina PC, Emini EA, Gruber WC, Scott DA, Schmole-Thoma B.	Clin Vaccine Immunol	54.6	50	1111	1
22742720	Fibroblast growth factor 23 and parathyroid hormone after treatment with active vitamin D and sevelamer carbonate in patients with chronic kidney disease stage 3b, a randomized crossover trial.	Bleskestad IH, Bergrem H, Hartmann A, Godang K, GÃ¸ransson LG.	BMC Nephrol	65.6	18	21	14
22744627	Comparison of metformin and insulin in the control of hyperglycaemia in non-diabetic critically ill patients.	Mojtahedzadeh M, Jafarieh A, Najafi A, Khajavi MR, Khalili N.	Endokrynol Pol	41.6	18	24	4
22744733	Estimating physical activity using a cell phone questionnaire sent by means of short message service (SMS): a randomized population-based study.	Lagerros YT, Sandin S, Be-elius C, Litton JE, Lof M.	Eur J Epidemiol	999	18	2096	5
22747998	Improving treatment intensification to reduce cardiovascular disease risk: a cluster randomized trial.	Selby JV, Schmittdiel JA, Fireman B, Jaffe M, Ransom LJ, Dyer W, Uratsu CS, Reed ME, Kerr EA, Hsu J.	BMC Health Serv Res	60.5	18	30007	9
22748516	Azithromycin therapy in hospitalized infants with acute bronchiolitis is not associated with better clinical outcomes: a randomized, double-blinded, and placebo-controlled clinical trial.	Pinto LA, Pitrez PM, Luisi F, de Mello PP, Gerhardt M, Ferlini R, Barbosa DC, Daros I, Jones MH, Stein RT, Marostica PJ.	J Pediatr	0.3	0	184	10
22749178	Green tea e-tract reduces blood pressure, inflammatory biomarkers, and o-idative stress and improves parameters associated with insulin resistance in obese, hypertensive patients.	Bogdanski P, Suliburska J, Szulinska M, Stepien M, Pupek-Musialik D, Jablecka A.	Nutr Res	50.4	30	56	4
22749425	Recovery of overall e-ercise ability, quality of life, and continence after 12-week combined e-ercise intervention in elderly patients who underwent radical prostatectomy: a randomized controlled study.	Park SW, Kim TN, Nam JK, Ha HK, Shin DG, Lee W, Kim MS, Chung MK.	Urology	69.3	65	66	14
22750851	Is there a perfectionist in each of us? An e-perimental study on perfectionism and eating disorder symptoms.	Boone L, Soenens B, Vansteenkiste M, Braet C.	Appetite	20.6	18	100	5
22751354	Cognitive function in elderly can be ameliorated by training in temporal information processing.	Szelag E, Skolimowska J.	Restor Neurol Neurosci	69.3	65	30	6
22751375	Impact of a nutritional formula enriched in fish oil and micronutrients on pressure ulcers in critical care patients.	Theilla M, Schwartz B, Cohen J, Shapiro H, Anbar R, Singer P.	Am J Crit Care	51.2	999	40	12
22751603	Treatment of psoriatic arthritis with tumor necrosis factor inhibitors: longer-term outcomes including enthesitis and dactylitis with golimumab treatment in the Longterm E-tension of a Randomized, Placebo-controlled Study (GO-REVEAL).	Kavanaugh A, Mease P.	J Rheumatol Suppl	47	999	405	13
22751878	Variation in intracranial pressure monitoring and outcomes in pediatric traumatic brain injury.	Bennett TD, Riva-Cambrin J, Keenan HT, Korgenski EK, Bratton SL.	Arch Pediatr Adolesc Med	21.7	16	485	5
22752776	An open-label, randomized efficacy and safety trial of subcutaneous and intramuscular BT088 (Fovepta) human hepatitis B immunoglobulin in neonates of HBV-carrier mothers.	Bu-mann H, Kamin W, KrivÃ¡n G, SiklÃ³s P, Mendling W, Wartenberg-Demand A, Wolf DM, Schlosser RL.	J Perinat Med	0	999	34	16
22753128	E-periential self-focus writing as a facilitator of processing an interpersonal hurt.	Liao KY, Wei M, Russell DW, Abraham WT.	J Clin Psychol	19.5	999	182	5
22754044	Sleep restriction decreases the physical activity of adults at risk for type 2 diabetes.	Bromley LE, Booth JN 3rd, Kilkus JM, Imperial JG, Penev PD.	Sleep	27	22	18	4
22759259	Physician and patient satisfaction after use of calcium hydro-ylapatite for cheek augmentation.	Moers-Carpi M, Storck R, Howell DJ, Ogilvie P, Ogilvie A.	Dermatol Surg	56	18	116	12
22759721	Indications for and use of nonsteroidal antiinflammatory drugs and the risk of incident, symptomatic benign prostatic hyperplasia: results from the prostate cancer prevention trial.	Schenk JM, Calip GS, Tangen CM, Goodman P, Parsons JK, Thompson IM, Kristal AR.	Am J Epidemiol	999	55	4735	14
22761191	Efficacy of sublingual swallow immunotherapy in children with rye grass pollen allergic rhinitis: a double-blind placebo-controlled study.	Ahmadiafshar A, Maarefvand M, Taymourzade B, Mazloomzadeh S, Torabi Z.	Iran J Allergy Asthma Immunol	8.6	5	24	10
22764364	Naltre-one implant for the treatment of polydrug dependence: a randomized controlled trial.	Tiihonen J, Krupitsky E, Verbitskaya E, Blokhina E, Mamontova O, Fohr J, Tuomola P, Kuoppasalmi K, Kiviniemi V, Zwartau E.	Am J Psychiatry	28.7	18	100	5
22764846	A randomized, placebo controlled trial of oral zinc for chemotherapy-related taste and smell disorders.	Lyckholm L, Heddinger SP, Parker G, Coyne PJ, Ramakrishnan V, Smith TJ, Henkin RI.	J Pain Palliat Care Pharmacother	53	18	41	2
22766314	Pemetre-ed versus doceta-el in second line non-small-cell lung cancer: results and subsets analyses of a multi-center, randomized, e-ploratory trial in Chinese patients.	Li R, Sun L, Wang J, Qian J, Wang Z, Jiao -.	Pulm Pharmacol Ther	56.9	18	208	2
22766993	Medium light and medium roast paper-filtered coffee increased antio-idant capacity in healthy volunteers: results of a randomized trial.	CorrÃªa TA, Monteiro MP, Mendes TM, Oliveira DM, Rogero MM, Benites CI, Vinagre CG, Mioto BM, Tarasoutchi D, Tuda VL, Cesar LA, Torres EA.	Plant Foods Hum Nutr	49	20	20	4
22767972	Retrospective analysis of 697 septoplasty surgery cases: packing versus trans-septal suturing method.	Cukurova I, Cetinkaya EA, Mercan GC, Demirhan E, Gumussoy M.	Acta Otorhinolaryngol Ital	28.9	999	697	10
22768640	Effect of boot weight and sole fle-ibility on gait and physiological responses of firefighters in stepping over obstacles.	Chiou SS, Turner N, Zwiener J, Weaver DL, Haskell WE.	Hum Factors	28.4	999	14	13
22769235	A multicenter randomized double-masked comparative study of different preparations of alendronate in osteoporosis - monthly (four weeks) intravenous versus once weekly oral administrations.	Shiraki M, Nakamura T, Fukunaga M, Sone T, Usami A, Inoue T.	Curr Med Res Opin	65.8	46	292	13
22770485	Randomized Clinical Trial of Two Resin-Modified Glass Ionomer Materials: 1-year Results.	PerdigÃ£o J, Dutra-CorrÃªa M, Saraceni S, Ciaramicoli M, Kiyan V.	Oper Dent	48.7	999	33	22
22770692	High thoracic epidural analgesia in cardiac surgery: part 2-high thoracic epidural analgesia does not reduce time in or improve quality of recovery in the intensive care unit.	Nielsen DV, Bhavsar R, Greisen J, Ryhammer PK, Sloth E, Jakobsen CJ.	J Cardiothorac Vasc Anesth	71.2	65	60	9
22776535	Fractional photothermolysis for the treatment of facial wrinkles - searching for optimal treatment parameters in a randomized study in the split-face design.	Peukert N, Bayer J, Becke D, Zurakowski D, Luger T, Manstein D, Laubach HJ.	J Dtsch Dermatol Ges	47	999	11	12
22776937	Intravitreal bevacizumab in advanced-stage neovascular age-related macular degeneration with visual acuity lower than 20/200.	Parodi MB, Cascavilla M, Papayannis A, Kontadakis DS, Bandello F, Iacono P.	Arch Ophthalmol	71.5	999	21	7
22776980	Probiotics modulate host-microbe interaction in the placenta and fetal gut: a randomized, double-blind, placebo-controlled trial.	Rautava S, Collado MC, Salminen S, Isolauri E.	Neonatology	38.9	999	29	15
22778571	Introducer curving technique for the prevention of tilting of transfemoral Gunther Tulip inferior vena cava filter.	-iao L, Huang DS, Shen J, Tong JJ.	Korean J Radiol	51.2	18	108	9
22782367	Use of a prosthetic mesh to prevent parastomal hernia during laparoscopic abdominoperineal resection: a randomized controlled trial.	LÃ³pez-Cano M, Lozoya-Trujillo R, Quiroga S, SÃ¡nchez JL, Vallribera F, MartÃ­ M, Jimenez LM, Armengol-Carrasco M, EspÃ­n E.	Hernia	69.2	18	36	11
22786596	A randomized trial of stress management for the prevention of new brain lesions in MS.	Mohr DC, Lovera J, Brown T, Cohen B, Neylan T, Henry R, Siddique J, Jin L, Daikh D, Pelletier D.	Neurology	42.7	18	121	6
22789149	The impact of patient and physician computer mediated communication skill training on reported communication and patient satisfaction.	Roter DL, We-ler R, Naragon P, Forrest B, Dees J, Almodovar A, Wood J.	Patient Educ Couns	50.1	999	194	21
22789440	A randomized controlled trial comparing ceftria-one with cefazolin for antibiotic prophyla-is in abdominal hysterectomy.	Phoolcharoen N, Nilgate S, Rattanapuntamanee O, Limpongsanurak S, Chaithongwongwatthana S.	Int J Gynaecol Obstet	45.4	999	320	14
22790008	Is there any benefit to adding intravenous ketamine to patient-controlled epidural analgesia after thoracic surgery? A randomized double-blind study.	Joseph C, Gaillat F, Duponq R, Lieven R, Baumstarck K, Thomas P, Penot-Ragon C, Kerbaul F.	Eur J Cardiothorac Surg	60	18	60	9
22790524	Effect of si- months lifestyle intervention in Japanese men with metabolic syndrome: randomized controlled trial.	Nanri A, Tomita K, Matsushita Y, Ichikawa F, Yamamoto M, Nagafuchi Y, Kakumoto Y, Mizoue T.	J Occup Health	53.2	999	102	4
22791533	Does weekly direct observation and formal feedback improve intern patient care skills development? A randomized controlled trial.	Shelesky G, D'Amico F, Marfatia R, Munshi A, Wilson SA.	Fam Med	27.5	999	14	21
22791755	Ethinyl estradiol-cyproterone acetate versus low-dose pioglitazone-flutamide-metformin for adolescent girls with androgen e-cess: divergent effects on CD163, TWEAK receptor, ANGPTL4, and LEPTIN e-pression in subcutaneous adipose tissue.	DÃ­az M, ChacÃ³n MR, LÃ³pez-Bermejo A, MaymÃ³-Masip E, Salvador C, Vendrell J, de Zegher F, IbÃ¡Ã±ez L.	J Clin Endocrinol Metab	16.2	999	34	4
22791766	Si- months of parathyroid Hormone (1-84) administered concurrently versus sequentially with monthly ibandronate over two years: the PTH and ibandronate combination study (PICS) randomized trial.	Schafer AL, Sellmeyer DE, Palermo L, Hietpas J, Eastell R, Shoback DM, Black DM.	J Clin Endocrinol Metab	62	55	44	4
22791904	Posiphen as a candidate drug to lower CSF amyloid precursor protein, amyloid-Î² peptide and Ï? levels: target engagement, tolerability and pharmacokinetics in humans.	Maccecchini ML, Chang MY, Pan C, John V, Zetterberg H, Greig NH.	J Neurol Neurosurg Psychiatry	999	55	125	22
22795291	E-ercise effects on lipids in persons with varying dietary patterns-does diet matter if they e-ercise? Responses in Studies of a Targeted Risk Reduction Intervention through Defined E-ercise I.	Huffman KM, Hawk VH, Henes ST, Ocampo CI, Orenduff MC, Slentz CA, Johnson JL, Houmard JA, Samsa GP, Kraus WE, Bales CW.	Am Heart J	999	40	204	4
22795436	Interstage mortality after the Norwood procedure: Results of the multicenter Single Ventricle Reconstruction trial.	Ghanayem NS, Allen KR, Tabbutt S, Atz AM, Clabby ML, Cooper DS, Eghtesady P, Frommelt PC, Gruber PJ, Hill KD, Kaltman JR, Laussen PC, Lewis AB, Lurito KJ, Minich LL, Ohye RG, Schonbeck JV, Schwartz SM, Singh RK, Goldberg CS; Pediatric Heart Network Investigators.	J Thorac Cardiovasc Surg	5.7	999	426	9
22796472	Investigation of a novel algorithm for synchronized left-ventricular pacing and ambulatory optimization of cardiac resynchronization therapy: results of the adaptive CRT trial.	Martin DO, Lemke B, Birnie D, Krum H, Lee KL, Aonuma K, Gasparini M, Starling RC, Milasinovic G, Rogers T, Sambelashvili A, Gorcsan J 3rd, Houmsse M; Adaptive CRT Study Investigators.	Heart Rhythm	65.7	999	478	9
22798004	Orange juice limits postprandial fat o-idation after breakfast in normal-weight adolescents and adults.	Stookey JD, Hamer J, Espinoza G, Higa A, Ng V, Tinajero-Deck L, Havel PJ, King JC.	Adv Nutr	20.5	999	17	4
22798540	Impact of navigators on completion of steps in the kidney transplant process: a randomized, controlled trial.	Sullivan C, Leon JB, Sayre SS, Marbury M, Ivers M, Pencak JA, Bodziak KA, Hricik DE, Morrison EJ, Albert JM, Navaneethan SD, Reyes CM, Sehgal AR.	Clin J Am Soc Nephrol	55	18	167	20
22800889	Three hours continuous injection of adenosine improved left ventricular function and infarct size in patients with ST-segment elevation myocardial infarction.	Zhang H, Tian NL, Hu ZY, Wang F, Chen L, Zhang YJ, Chen SL.	Chin Med J (Engl)	63.3	18	90	9
22801348	Rapid plasma reagin titer variation in the 2 weeks after syphilis therapy.	Holman KM, Wolff M, SeÃ±a AC, Martin DH, Behets F, Van Damme K, Leone P, McNeil L, Gehrig ML, Hook EW 3rd.	Se- Transm Dis	999	999	470	1
22801581	Optimal remifentanil dose for lightwand intubation without muscle rela-ants in healthy patients with thiopental coadministration: a prospective randomised study.	Jeon YT, Oh AY, Park SH, Hwang JW, Park HP.	Eur J Anaesthesiol	41.7	18	96	10
22802072	Evaluating a comprehensive strategy to improve engagement to group-based behavioral parent training for high-risk families of children with ADHD.	Chacko A, Wymbs BT, Chimiklis A, Wymbs FA, Pelham WE.	J Abnorm Child Psychol	35.4	999	80	5
22804816	Comparison of plaque accumulation and soft-tissue blood flow with the use of full-arch implant-supported fi-ed prostheses with mucosal surfaces of different materials: a randomized clinical study.	Kanao M, Nakamoto T, Kajiwara N, Kondo Y, Masaki C, Hosokawa R.	Clin Oral Implants Res	66	999	19	22
22805294	Effect of CPP-ACP paste on dental caries in primary teeth: a randomized trial.	Sitthisettapong T, Phantumvanit P, Huebner C, Derouen T.	J Dent Res	3.1	2.5	296	22
22805313	Beneficial effects of Korean red ginseng on lymphocyte DNA damage, antio-idant enzyme activity, and LDL o-idation in healthy participants: a randomized, double-blind, placebo-controlled trial.	Kim JY, Park JY, Kang HJ, Kim OY, Lee JH.	Nutr J	36.2	20	57	4
22806257	Influence of individual and social conte-tual factors on changes in leisure-time physical activity in working-class populations: results of the Healthy Directions-Small Businesses Study.	McNeill LH, Stoddard A, Bennett GG, Wolin KY, Sorensen GG.	Cancer Causes Control	44	999	850	2
22808932	Effect of a home-based simple yoga program in child-care workers: a randomized controlled trial.	Sakuma Y, Sasaki-Otomaru A, Ishida S, Kanoya Y, Arakawa C, Mochizuki Y, Seiishi Y, Sato C.	J Altern Complement Med	33.6	20	98	14
22809107	Bright light treatment as mono-therapy of non-seasonal depression for 28 adolescents.	Niederhofer H, von Klitzing K.	Int J Psychiatry Clin Pract	999	999	28	5
22810989	Margarines fortified with Î±-linolenic acid, eicosapentaenoic acid, or docosahe-aenoic acid alter the fatty acid composition of erythrocytes but do not affect the antio-idant status of healthy adults.	Egert S, Lindenmeier M, Harnack K, Krome K, Erbersdobler HF, Wahrburg U, Somoza V.	J Nutr	999	19	76	4
22811030	Sodium nitrate supplementation does not enhance performance of endurance athletes.	BescÃ³s R, Ferrer-Roca V, Galilea PA, Roig A, Drobnic F, Sureda A, Martorell M, Cordova A, Tur JA, Pons A.	Med Sci Sports E-erc	13	999	32.6	5
22812440	The effect of chewing gum on the impact, pain and breakages associated with fi-ed orthodontic appliances: a randomized clinical trial.	Benson PE, Razi RM, Al-Bloushi RJ.	Orthod Craniofac Res	14.3	11	57	22
22813209	Prospective, randomized, controlled comparison of SYSTANE UD eye drops versus VISINE INTENSIV 1% EDO eye drops for the treatment of moderate dry eye.	Jacobi C, Kruse FE, Cursiefen C.	J Ocul Pharmacol Ther	44	999	28	7
22814692	Supragingival plaque removal with and without dentifrice: a randomized controlled clinical trial.	Zanatta FB, Antoniazzi RP, Pinto TM, Rosing CK.	Braz Dent J	22.4	999	24	22
22818725	Daily apple versus dried plum: impact on cardiovascular disease risk factors in postmenopausal women.	Chai SC, Hooshmand S, Saadat RL, Payton ME, Brummel-Smith K, Arjmandi BH.	J Acad Nutr Diet	56.7	999	100	9
22818869	Effect of lysine, vitamin B(6), and carnitine supplementation on the lipid profile of male patients with hypertriglyceridemia: a 12-week, open-label, randomized, placebo-controlled trial.	Hlais S, Reslan DR, Sarieddine HK, Nasreddine L, Taan G, Azar S, Obeid OA.	Clin Ther	52.7	999	85	4
22822010	A randomized trial comparing buttonhole with rope ladder needling in conventional hemodialysis patients.	MacRae JM, Ahmed SB, Atkar R, Hemmelgarn BR.	Clin J Am Soc Nephrol	68.5	18	140	21
22824168	L-Carnitine-supplementation in advanced pancreatic cancer (CARPAN)--a randomized multicentre trial.	Kraft M, Kraft K, GÃ¤rtner S, Mayerle J, Simon P, Weber E, Schutte K, Stieler J, Koula-Jenik H, Holzhauer P, Grober U, Engel G, Muller C, Feng YS, Aghdassi A, Nitsche C, Malfertheiner P, Patrzyk M, Kohlmann T, Lerch MM.	Nutr J	66.4	999	72	2
22825363	Capsule endoscopy or angiography in patients with acute overt obscure gastrointestinal bleeding: a prospective randomized study with long-term follow-up.	Leung WK, Ho SS, Suen BY, Lai LH, Yu S, Ng EK, Ng SS, Chiu PW, Sung JJ, Chan FK, Lau JY.	Am J Gastroenterol	56	18	60	11
22826621	Inhibitory effects of carbon dio-ide insufflation on pneumoperitoneum and bowel distension after percutaneous endoscopic gastrostomy.	Nishiwaki S, Araki H, Hayashi M, Takada J, Iwashita M, Tagami A, Hatakeyama H, Hayashi T, Maeda T, Saito K.	World J Gastroenterol	82.1	999	58	11
22830462	Coronary CT angiography versus standard evaluation in acute chest pain.	Hoffmann U, Truong QA, Schoenfeld DA, Chou ET, Woodard PK, Nagurney JT, Pope JH, Hauser TH, White CS, Weiner SG, Kalanjian S, Mullins ME, Mikati I, Peacock WF, Zakroysky P, Hayden D, Goehler A, Lee H, Gazelle GS, Wiviott SD, Fleg JL, Udelson JE; et al.	N Engl J Med	54	40	1000	9
22835570	Using platelet-rich plasma for the treatment of symptomatic cervical ectopy.	Hua -, Zeng Y, Zhang R, Wang H, Diao J, Zhang P.	Int J Gynaecol Obstet	34.5	999	100	14
22836073	The high-dose rosuvastatin once weekly study (the HD-ROWS).	Backes JM, Gibson CA, Ruisinger JF, Moriarty PM.	J Clin Lipidol	48	18	20	4
22837058	Intraindividual comparison of 1,470â??nm diode laser versus carbon dio-ide laser for tonsillotomy: a prospective, randomized, double blind, controlled feasibility trial.	Havel M, Sroka R, Englert E, Stelter K, Leunig A, Betz CS.	Lasers Surg Med	6.3	999	13	10
22840278	A randomized controlled study of two educational interventions on adherence with oral contraceptives and condoms.	Berenson AB, Rahman M.	Contraception	19.9	16	1155	14
22842339	Relief of methacholine-induced bronchospasm with e-trafine beclomethasone dipropionate/formoterol in comparison with salbutamol in asthma.	Singh D, Corradi M, Bindi E, Baronio R, Petruzzelli S, Paggiaro P.	Pulm Pharmacol Ther	40.3	18	56	10
22842557	Balloon Kyphoplasty versus KIVA vertebral Augmentation. Comparison of two Techniques for Osteoporotic Vertebral Body Fractures: A Prospective Randomized Study.	Panagiotis K, Konstantinos V, Thomas R, Vasilios V.	Spine (Phila Pa 1976)	71	999	168	13
22846190	Clinical trial: transcutaneous interferential electrical stimulation in individuals with irritable bowel syndrome - a prospective double-blind randomized study.	Coban Å?, Akbal E, Koklu S, Koklu G, UlaÅ?lÄ± MA, Erkec S, AktaÅ? B, Yuksel O, Kocak E, Erdem HR.	Digestion	41.8	999	58	11
22846674	Tactile/kinesthetic stimulation (TKS) increases tibial speed of sound and urinary osteocalcin (U-MidOC and unOC) in premature infants (29-32weeks PMA).	Haley S, Beachy J, Ivaska KK, Slater H, Smith S, Moyer-Mileur LJ.	Bone	0	0	40	16
22847248	Prospective study on retinal nerve fibre layer changes after an acute episode of phacomorphic angle closure.	Lee JW, Lai JS, Yick DW, Yuen CY.	Int Ophthalmol	79.1	999	10	7
22849308	The effect of weight-based volume loading on the inferior vena cava in fasting subjects: a prospective randomized double-blinded trial.	Weekes AJ, Lewis MR, Kahler ZP, Stader DE, Quirke DP, Norton HJ, Almond C, Middleton D, Tayal VS.	Acad Emerg Med	33	18	42	9
22849587	The effect of crystalloid versus medium molecular weight colloid solution on post-operative nausea and vomiting after ambulatory gynecological surgery - a prospective randomized trial.	Hayes I, Rathore R, Enohumah K, Mocanu E, Kumar D, McCaul C.	BMC Anesthesiol	35.4	18	120	14
22849964	Efficacy of raltegravir versus efavirenz when combined with tenofovir/emtricitabine in treatment-naÃ¯ve HIV-1-infected patients: week-192 overall and subgroup analyses from STARTMRK.	DeJesus E, Rockstroh JK, Lenno- JL, Saag MS, Lazzarin A, Zhao J, Wan H, Rodgers AJ, Walker ML, Miller M, DiNubile MJ, Nguyen BY, Teppler H, Leavitt R, Sklar P; STARTMRK Investigators.	HIV Clin Trials	36.5	18	457	1
22853453	Nasogastric tube insertion in anesthetized and intubated patients: a new and reliable method.	Tsai YF, Luo CF, Illias A, Lin CC, Yu HP.	BMC Gastroenterol	54.8	23	103	11
22853873	The effectiveness of a group psycho-educational program on family caregiver burden of patients with mental disorders.	Navidian A, Kermansaravi F, Rigi SN.	BMC Res Notes	43	15	100	5
22854323	Beneficial effects of high-dose atorvastatin pretreatment on renal function in patients with acute ST-segment elevation myocardial infarction undergoing emergency percutaneous coronary intervention.	Li W, Fu -, Wang Y, Li -, Yang Z, Wang -, Geng W, Gu -, Hao G, Jiang Y, Fan W, Wu W, Li S.	Cardiology	65.8	999	161	9
22854954	Preliminary e-perience of fast-track surgery combined with laparoscopy-assisted radical distal gastrectomy for gastric cancer.	Chen Hu J, -in Jiang L, Cai L, Tao Zheng H, Yuan Hu S, Bing Chen H, Chang Wu G, Fei Zhang Y, Chuan Lv Z.	J Gastrointest Surg	62.5	999	82	11
22855038	A randomized controlled trial comparing total glucosides of paeony capsule and compound glycyrrhizin tablet for alopecia areata.	Yang DQ, You LP, Song PH, Zhang L-, Bai YP.	Chin J Integr Med	999	18	86	12
22858078	Heart failure outcomes and benefits of NT-proBNP-guided management in the elderly: results from the prospective, randomized ProBNP outpatient tailored chronic heart failure therapy (PROTECT) study.	Gaggin HK, Mohammed AA, Bhardwaj A, Rehman SU, Gregory SA, Weiner RB, Baggish AL, Moore SA, Semigran MJ, Januzzi JL Jr.	J Card Fail	63.3	999	151	9
22863658	A fully liquid DTaP-IPV-Hep B-PRP-T he-avalent vaccine for primary and booster vaccination of healthy Me-ican children.	Aquino AG, Brito MG, Doniz CE, Herrera JF, Macias M, Zambrano B, Plennevau- E, Santos-Lima E.	Vaccine	0.2	0.2	1189	1
22865576	A randomized trial of mupirocin sinonasal rinses versus saline in surgically recalcitrant staphylococcal chronic rhinosinusitis.	Jervis-Bardy J, Boase S, Psaltis A, Foreman A, Wormald PJ.	Laryngoscope	41.7	18	96	22
22866996	Yoga Nidra rela-ation increases heart rate variability and is unaffected by a prior bout of Hatha yoga.	Markil N, Whitehurst M, Jacobs PL, Zoeller RF.	J Altern Complement Med	29.2	999	20	9
22867074	Improving healthy dietary behaviors, nutrition knowledge, and self-efficacy among underserved school children with parent and community involvement.	Wright K, Norris K, Newman Giger J, Suro Z.	Child Obes	8.6	8	251	4
22869994	Effect of holistic yoga program on an-iety symptoms in adolescent girls with polycystic ovarian syndrome: A randomized control trial.	Nidhi R, Padmalatha V, Nagarathna R, Amritanshu R.	Int J Yoga	16.2	15	85	4
22872229	Effectiveness of the Austrian disease management programme Therapie Aktiv" for type 2 diabetes regarding the improvement of metabolic control risk profile and guideline adherence: 2 years of follow up."	Flamm M, Panisch S, Winkler H, Johansson T, Weitgasser R, Sonnichsen AC.	Wien Klin Wochenschr	65.1	18	801	4
22872695	Integration of balance and strength training into daily life activity to reduce rate of falls in older people (the LiFE study): randomised parallel trial.	Clemson L, Fiatarone Singh MA, Bundy A, Cumming RG, Manollaras K, O'Loughlin P, Black D.	BMJ	83.4	70	317	13
22875553	Introduction of Î²-carotene-rich orange sweet potato in rural Uganda resulted in increased vitamin A intakes among children and women and improved vitamin A status among children.	Hotz C, Loechl C, Lubowa A, Tumwine JK, Ndeezi G, Nandutu Masawi A, Baingana R, Carriquiry A, de Brauw A, Meenakshi JV, Gilligan DO.	J Nutr	15.7	0.5	1347	4
22877506	Therapeutic platelet transfusion versus routine prophylactic transfusion in patients with haematological malignancies: an open-label, multicentre, randomised study.	Wandt H, Schaefer-Eckart K, Wendelin K, Pilz B, Wilhelm M, Thalheimer M, Mahlknecht U, Ho A, Schaich M, Kramer M, Kaufmann M, Leimer L, Schwerdtfeger R, Conradi R, Dolken G, Klenner A, HÃ¤nel M, Herbst R, Junghanss C, Ehninger G; Study Alliance Leukemia.	Lancet	55.2	16	391	2
22878381	Effect of multizone refractive multifocal contact lenses on standard automated perimetry.	Madrid-Costa D, Ruiz-Alcocer J, GarcÃ­a-LÃ¡zaro S, AlbarrÃ¡n-Diego C, Ferrer-Blasco T.	Eye Contact Lens	50.4	45	30	7
22878491	Ketamine-propofol vs ketamine-de-medetomidine combinations in pediatric patients undergoing burn dressing changes.	Canpolat DG, Esmaoglu A, Tosun Z, Akn A, Boyaci A, Coruh A.	J Burn Care Res	2.4	0.7	60	12
22878706	Physical Function Outcome in Cervical Radiculopathy Patients After Physiotherapy Alone Compared with Anterior Surgery Followed by Physiotherapy: A Prospective Randomized Study with a Two-Year Follow-up.	Peolsson A, Soderlund A Professor, Engquist M, Lind B Assoc Prof, Lofgren H, Vavruch L Assoc Prof, Holtz A, Winstrom-Christersson A, Isaksson I, Oberg B Professor.	Spine (Phila Pa 1976)	46	18	63	13
22879908	Effects of pregabalin on central sensitization in patients with chronic pancreatitis in a randomized, controlled trial.	Bouwense SA, Olesen SS, Drewes AM, Poley JW, van Goor H, Wilder-Smith OH.	PLoS One	53.5	999	64	11
22882399	Postprison release HIV-risk behaviors in a randomized trial of methadone treatment for prisoners.	Wilson ME, Kinlock TW, Gordon MS, O'Grady KE, Schwartz RP.	Am J Addict	39.9	999	211	5
22882515	Selective resection of dorsal nerves of penis for premature ejaculation.	Zhang G-, Yu LP, Bai WJ, Wang -F.	Int J Androl	25.4	18	101	14
22882753	Influence of sumatriptan on gastric accommodation and on antral contraction in healthy subjects assessed by ultrasonography.	Sekino Y, Yamada E, Sakai E, Ohkubo H, Higurashi T, Iida H, Endo H, Takahashi H, Koide T, Sakamoto Y, Nonaka T, Gotoh E, Maeda S, Nakajima A, Inamori M.	Neurogastroenterol Motil	20	999	10	11
22888611	Impact of twice weekly versus daily iron supplementation during pregnancy on maternal and fetal haematological indices: a randomized clinical trial.	Goshtasebi A, Alizadeh M.	East Mediterr Health J	26.3	18	370	15
22891881	Interpersonal psychotherapy-adolescent skills training: an-iety outcomes and impact of comorbidity.	Young JF, Makover HB, Cohen JR, Mufson L, Gallop RJ, Benas JS.	J Clin Child Adolesc Psychol	14	999	98	5
22893135	Hyoscine butylbromide administered at the cecum increases polyp detection: a randomized double-blind placebo-controlled trial.	Corte C, Dahlenburg L, Selby W, Griffin S, Byrne C, Chua T, Kaffes A.	Endoscopy	61	40	601	11
22893231	Using pay for performance to improve treatment implementation for adolescent substance use disorders: results from a cluster randomized trial.	Garner BR, Godley SH, Dennis ML, Hunter BD, Bair CM, Godley MD.	Arch Pediatr Adolesc Med	15.9	999	953	5
22893628	Bone-related complications and quality of life in advanced breast cancer: results from a randomized phase III trial of denosumab versus zoledronic acid.	Martin M, Bell R, Bourgeois H, Brufsky A, Diel I, Eniu A, Fallowfield L, Fujiwara Y, Jassem J, Paterson AH, Ritchie D, Steger GG, Stopeck A, Vogel C, Fan M, Jiang Q, Chung K, Dansey R, Braun A.	Clin Cancer Res	56.5	18	2046	2
22895080	Consumption of different soymilk formulations differentially affects the gut microbiomes of overweight and obese men.	Fernandez-Raudales D, Hoeflinger JL, Bringe NA, Co- SB, Dowd SE, Miller MJ, Gonzalez de Mejia E.	Gut Microbes	32	20	64	11
22895856	Walnuts improve semen quality in men consuming a Western-style diet: randomized control dietary intervention trial.	Robbins WA, -un L, FitzGerald LZ, Esguerra S, Henning SM, Carpenter CL.	Biol Reprod	25.2	21	117	14
22900702	Acute effects of chlorogenic acid on nitric o-ide status, endothelial function, and blood pressure in healthy volunteers: a randomized trial.	Mubarak A, Bondonno CP, Liu AH, Considine MJ, Rich L, Mas E, Croft KD, Hodgson JM.	J Agric Food Chem	52.3	999	23	4
22901348	A randomized controlled trial of dulo-etine versus placebo in the treatment of nonmajor chronic depression.	Hellerstein DJ, Stewart JW, McGrath PJ, Deliyannides DA, Batchelder ST, Black SR, Withers A, O'Shea D, Chen Y.	J Clin Psychiatry	41.6	18	57	5
22901350	Agomelatine prevents relapse in generalized an-iety disorder: a 6-month randomized, double-blind, placebo-controlled discontinuation study.	Stein DJ, Ahokas A, Albarran C, Olivier V, Allgulander C.	J Clin Psychiatry	46.5	18	227	5
22901437	A short message service (SMS)-based strategy for enhancing adherence to antipsychotic medication in schizophrenia.	Montes JM, Medina E, Gomez-Beneyto M, Maurino J.	Psychiatry Res	39.8	18	254	5
22901955	Task shifting of antiretroviral treatment from doctors to primary-care nurses in South Africa (STRETCH): a pragmatic, parallel, cluster-randomised trial.	Fairall L, Bachmann MO, Lombard C, Timmerman V, Uebel K, Zwarenstein M, Boulle A, Georgeu D, Colvin CJ, Lewin S, Faris G, Cornick R, Draper B, Tshabalala M, Kotze E, van Vuuren C, Steyn D, Chapman R, Bateman E.	Lancet	35.6	0	9252	1
22902097	Patients' perceptions of subcutaneous delivery of darbepoetin alfa by autoinjector prefilled pen versus prefilled syringe: a randomized, crossover study.	Lim WH, Chan D, Boudville N, Pellicano S, Herson H, Moody H, Hutchison B, Snedeker M, Dogra G.	Clin Ther	61.2	18	50	14
22902193	Immediate effects of the suboccipital muscle inhibition technique in craniocervical posture and greater occipital nerve mechanosensitivity in subjects with a history of orthodontia use: a randomized trial.	Heredia Rizo AM, Pascual-Vaca ÃO, Cabello MA, Blanco CR, Pozo FP, Carrasco AL.	J Manipulative Physiol Ther	21	18	24	6
22902522	Fish oil supplementation augments post-e-ercise immune function in young males.	Gray P, Gabriel B, Thies F, Gray SR.	Brain Behav Immun	24	999	16	5
22902987	Pharmacokinetics and tolerance of dehydroandrographolide succinate injection after intravenous administration in healthy Chinese volunteers.	Chen Q, Liu Y, Liu YM, Liu GY, Zhang MQ, Jia JY, Lu C, Yu C.	Acta Pharmacol Sin	24.3	18	9	10
22906114	Spine deviations and orthodontic treatment of asymmetric malocclusions in children.	Lippold C, Moiseenko T, Drerup B, Schilgen M, Vegh A, Danesh G.	BMC Musculoskelet Disord	7.3	999	66	22
22906140	Efficacy of tuned waveforms based on different membrane time constants on defibrillation thresholds: primary results from the POWER trial.	Doshi SK, Pittaro MD, Reeves R, Boyce K, Payne JP, Kroll MW, Graumann RJ, Oza AL, Val-Mejias JE.	Pacing Clin Electrophysiol	68	999	121	9
22906319	Cost-effectiveness of counselling, graded-e-ercise and usual care for chronic fatigue: evidence from a randomised trial in primary care.	Sabes-Figuera R, McCrone P, Hurley M, King M, Donaldson AN, Ridsdale L.	BMC Health Serv Res	41	999	163	18
22906744	An effective training to increase accurate recognition of patient emotion cues.	Blanch-Hartigan D.	Patient Educ Couns	19.3	999	203	21
22909282	Safety and tolerability of Pana- ginseng root e-tract: a randomized, placebo-controlled, clinical trial in healthy Korean volunteers.	Lee NH, Yoo SR, Kim HG, Cho JH, Son CG.	J Altern Complement Med	40.6	18	170	19
22910287	Dose sparing intradermal trivalent influenza (2010/2011) vaccination overcomes reduced immunogenicity of the 2009 H1N1 strain.	Hung IF, Levin Y, To KK, Chan KH, Zhang AJ, Li P, Li C, -u T, Wong TY, Yuen KY.	Vaccine	72.9	21	262	1
22910324	Switching to tenofovir/emtricitabine from abacavir/lamivudine in HIV-infected adults with raised cholesterol: effect on lipid profiles.	Behrens G, Maserati R, Rieger A, Domingo P, Abel F, Wang H, Pearce G.	Antivir Ther	999	18	85	1
22912552	Clinical trial: Lactobacillus plantarum 299v (DSM 9843) improves symptoms of irritable bowel syndrome.	Ducrotte P, Sawant P, Jayanthi V.	World J Gastroenterol	37.5	18	214	11
22913248	Increased EPA levels in serum phospholipids of humans after four weeks daily ingestion of one portion chicken fed linseed and rapeseed oil.	Haug A, Nyquist NF, Mosti TJ, Andersen M, HÃ¸stmark AT.	Lipids Health Dis	24	999	46	4
22914365	Phase I safety and immunogenicity evaluations of an alphavirus replicon HIV-1 subtype C gag vaccine in healthy HIV-1-uninfected adults.	Wecker M, Gilbert P, Russell N, Hural J, Allen M, Pensiero M, Chulay J, Chiu YL, Abdool Karim SS, Burke DS; HVTN 040/059 Protocol Team; NIAID HIV Vaccine Trials Network.	Clin Vaccine Immunol	28.5	18	84	1
22914404	Treatment of cervical intraepithelial neoplasia with topical imiquimod: a randomized controlled trial.	Grimm C, Polterauer S, Natter C, Rahhal J, Hefler L, Tempfer CB, Heinze G, Stary G, Reinthaller A, Speiser P.	Obstet Gynecol	30.5	18	59	2
22916819	Metabolism and performance during e-tended high-intensity intermittent e-ercise after consumption of low- and high-glycaemic inde- pre-e-ercise meals.	Bennett CB, Chilibeck PD, Barss T, Vatanparast H, Vandenberg A, Zello GA.	Br J Nutr	25.9	999	14	4
22918176	A test of different menu labeling presentations.	Liu PJ, Roberto CA, Liu LJ, Brownell KD.	Appetite	36.7	999	456	21
22918966	Randomised, double-blind, placebo-controlled study of olanzapine in patients with bipolar I depression.	Tohen M, McDonnell DP, Case M, Kanba S, Ha K, Fang YR, Katagiri H, Gomez JC.	Br J Psychiatry	35.7	18	514	5
22919307	Effects of Chinese liquors on cardiovascular disease risk factors in healthy young humans.	Zheng JS, Yang J, Huang T, Hu -J, Luo M, Li D.	ScientificWorldJournal	43	18	400	2
22920807	Motivating effects of cooperative e-ergame play for overweight and obese adolescents.	Staiano AE, Abraham AA, Calvert SL.	J Diabetes Sci Technol	16.2	999	31	4
22920991	A randomized controlled trial to assess the efficacy of an interactive mobile messaging intervention for underserved smokers: Project ACTION.	Vidrine DJ, Fletcher FE, Danysh HE, Marani S, Vidrine JI, Cantor SB, Prokhorov AV.	BMC Public Health	47.3	18	227	5
22921557	Effects of a home-based rehabilitation program in obese type 2 diabetics.	Labrunee M, Antoine D, VergÃ¨s B, Robin I, Casillas JM, Gremeau- V.	Ann Phys Rehabil Med	52.8	40	23	4
22922306	Randomized controlled clinical trial on pro-imal caries infiltration: three-year follow-up.	Meyer-Lueckel H, Bitter K, Paris S.	Caries Res	999	999	22	22
22922460	Improved de-terity after chronic electrical stimulation of the motor corte- for central pain: a special relevance for thalamic syndrome.	Nuti C, Vassal F, Mertens P, Lemaire JJ, Magnin M, Peyron R.	Stereotact Funct Neurosurg	999	999	38	6
22922564	Efficacy of mycophenolate mofetil in adolescent patients with lupus nephritis: evidence from a two-phase, prospective randomized trial.	Sundel R, Solomons N, Lisk L; Aspreva Lupus Management Study (ALMS) Group.	Lupus	31.9	12	370	14
22923753	Efficacy and safety of certolizumab pegol in a broad population of patients with active rheumatoid arthritis: results from the REALISTIC phase IIIb study.	Weinblatt ME, Fleischmann R, Huizinga TW, Emery P, Pope J, Massarotti EM, van Vollenhoven RF, Wollenhaupt J, Bingham CO 3rd, Duncan B, Goel N, Davies OR, Dougados M.	Rheumatology (O-ford)	55.1	18	1063	13
22924638	Fractional flow reserve-guided PCI versus medical therapy in stable coronary disease.	De Bruyne B, Pijls NH, Kalesan B, Barbato E, Tonino PA, Piroth Z, Jagic N, Mobius-Winkler S, Rioufol G, Witt N, Kala P, MacCarthy P, Engstrom T, Oldroyd KG, Mavromatis K, Manoharan G, Verlee P, Frobert O, Curzen N, Johnson JB, Juni P, Fearon WF; et al.	N Engl J Med	63.7	21	888	9
22925325	Prenatal and postnatal probiotics reduces maternal but not childhood allergic diseases: a randomized, double-blind, placebo-controlled trial.	Ou CY, Kuo HC, Wang L, Hsu TY, Chuang H, Liu CA, Chang JC, Yu HR, Yang KD.	Clin E-p Allergy	30.5	999	191	11
22925356	A parent focused child obesity prevention intervention improves some mother obesity risk behaviors: the Melbourne inFANT program.	Lioret S, Campbell KJ, Crawford D, Spence AC, Hesketh K, McNaughton SA.	Int J Behav Nutr Phys Act	0.3	999	542	4
22925609	Manual therapy followed by specific active e-ercises versus a placebo followed by specific active e-ercises on the improvement of functional disability in patients with chronic non specific low back pain: a randomized controlled trial.	Balthazard P, de Goumoens P, Rivier G, Demeulenaere P, Ballabeni P, Deriaz O.	BMC Musculoskelet Disord	43	20	42	13
22927201	A randomized trial of oral betamethasone to reduce ata-ia symptoms in ata-ia telangiectasia.	Zannolli R, Buoni S, Betti G, Salvucci S, Plebani A, Soresina A, Pietrogrande MC, Martino S, Leuzzi V, Finocchi A, Micheli R, Rossi LN, Brusco A, Misiani F, Fois A, Hayek J, Kelly C, Chessa L.	Mov Disord	9.7	3	13	6
22929437	Glucagon-like peptide-1 decreases intracerebral glucose content by activating he-okinase and changing glucose clearance during hyperglycemia.	Gejl M, Egefjord L, Lerche S, Vang K, Bibby BM, Holst JJ, Mengel A, MÃ¸ller N, Rungby J, Brock B, Gjedde A.	J Cereb Blood Flow Metab	22	999	10	4
22930120	Association between alcohol screening scores and diabetic self-care behaviors.	Thomas RM, Francis Gerstel PA, Williams EC, Sun H, Bryson CL, Au DH, Bradley KA.	Fam Med	64	999	3930	20
22931971	Hemodynamic changes of fractional flow reserve after double kissing crush and provisional stenting technique for true bifurcation lesions.	Ye F, Chen SL, Zhang JJ, Zhu ZS, Kan J, Tian NL, Lin S, Liu ZZ, You W, -u HM, -u J.	Chin Med J (Engl)	62.6	18	68	9
22931974	Efficacy and tolerability of e-enatide monotherapy in obese patients with newly diagnosed type 2 diabetes: a randomized, 26 weeks metformin-controlled, parallel-group study.	Yuan GH, Song WL, Huang YY, Guo -H, Gao Y.	Chin Med J (Engl)	57.8	18	59	4
22931975	Response surface analysis of sevoflurane-remifentanil interactions on consciousness during anesthesia.	Wang HL, Yang L, Guo -Y, Zhang LP, Bi SS, Lu W.	Chin Med J (Engl)	35.9	20	65	22
22932169	Budesonide/formoterol maintenance and reliever therapy in Chinese patients with asthma.	Lin JT, Chen P, Zhou -, Sun TY, -ie CM, -iu QY, Yao WZ, Yang L, Yin KS, Zhang YM.	Chin Med J (Engl)	49.7	12	222	10
22933669	Gender-specific high-fle-ion knee prosthesis in Indian women: a prospective randomised study.	Singh H, Mittal V, Nadkarni B, Agarwal S, Gulati D.	J Orthop Surg (Hong Kong)	66	60	100	13
22934592	E-learning and deliberate practice for oral case presentation skills: a randomized trial.	Heiman HL, Uchida T, Adams C, Butter J, Cohen E, Persell SD, Pribaz P, McGaghie WC, Martin GJ.	Med Teach	999	999	159	22
22935584	O-aliplatin/capecitabine vs o-aliplatin/infusional 5-FU in advanced colorectal cancer: the MRC COIN trial.	Madi A, Fisher D, Wilson RH, Adams RA, Meade AM, Kenny SL, Nichols LL, Seymour MT, Wasan H, Kaplan R, Maughan TS; COIN trial research group.	Br J Cancer	63.6	18	2397	2
22935853	The effects of stabilizing e-ercises on pain and disability of patients with lumbar segmental instability.	Javadian Y, Behtash H, Akbari M, Taghipour-Darzi M, Zekavat H.	J Back Musculoskelet Rehabil	999	18	13	13
22938147	The effects of e-traction of pulpally involved primary teeth on weight, height and BMI in underweight Filipino children. A cluster randomized clinical trial.	Monse B, Duijster D, Sheiham A, Grijalva-Eternod CS, van Palenstein Helderman W, Hobdell MH.	BMC Public Health	5	4	202	4
22938573	Implants of 6Â mm vs. 11Â mm lengths in the posterior ma-illa and mandible: a 1-year multicenter randomized controlled trial.	Gulje F, Abrahamsson I, Chen S, Stanford C, Zadeh H, Palmer R.	Clin Oral Implants Res	54.5	20	95	22
22939094	Using animated computer-generated te-t and graphics to depict the risks and benefits of medical treatment.	Tait AR, Voepel-Lewis T, Brennan-Martinez C, McGonegal M, Levine R.	Am J Med	54	999	200	21
22939276	A randomized prospective multicenter trial of a novel vascular sealant.	Stone WM, Cull DL, Money SR.	Ann Vasc Surg	66	18	217	9
22943559	RMP-02/MTN-006: A phase 1 rectal safety, acceptability, pharmacokinetic, and pharmacodynamic study of tenofovir 1% gel compared with oral tenofovir disopro-il fumarate.	Anton PA, Cranston RD, Kashuba A, Hendri- CW, Bumpus NN, Richardson-Harman N, Elliott J, Janocko L, Khanukhova E, Dennis R, Cumberland WG, Ju C, Carballo-Dieguez A, Mauck C, McGowan I.	AIDS Res Hum Retroviruses	42.1	999	36	1
22943664	Does local injury to the endometrium before IVF cycle really affect treatment outcome? Results of a randomized placebo controlled trial.	Baum M, Yerushalmi GM, Maman E, Kedem A, Machtinger R, Hourvitz A, Dor J.	Gynecol Endocrinol	34.6	18	32	21
22944873	The immune reconstitution inflammatory syndrome after antiretroviral therapy initiation in patients with tuberculosis: findings from the SAPiT trial.	Naidoo K, Yende-Zuma N, Padayatchi N, Naidoo K, Jithoo N, Nair G, Bamber S, Gengiah S, El-Sadr WM, Friedland G, Abdool Karim S.	Ann Intern Med	34.2	18	642	1
22945707	Comparison of sagittal and vertical dental changes during first phase of orthodontic treatment with MBT vs ROTH prescription.	Talapaneni AK, Supraja G, Prasad M, Kommi PB.	Indian J Dent Res	15.1	999	30	22
22947356	Blood pressure effects of combined Î²-blocker and angiotensin-converting enzyme inhibitor therapy compared with the individual agents: a placebo-controlled study with nebivolol and lisinopril.	Weber MA, Basile J, Stapff M, Khan B, Zhou D.	J Clin Hypertens (Greenwich)	49.2	18	661	9
22948250	Ultra-high-frequency left prefrontal transcranial magnetic stimulation as augmentation in severely ill patients with depression: a naturalistic sham-controlled, double-blind, randomized trial.	Ullrich H, Kranaster L, Sigges E, Andrich J, Sartorius A.	Neuropsychobiology	55.5	18	43	5
22948897	The effect of safinamide, a novel drug for Parkinson's disease, on pressor response to oral tyramine: a randomized, double-blind, clinical trial.	Marquet A, Kupas K, Johne A, Astruc B, Patat A, Krosser S, Kovar A.	Clin Pharmacol Ther	40.7	18	89	6
22950513	Low-frequency repetitive transcranial magnetic stimulation for the treatment of refractory partial epilepsy: a controlled clinical study.	Sun W, Mao W, Meng -, Wang D, Qiao L, Tao W, Li L, Jia -, Han C, Fu M, Tong -, Wu -, Wang Y.	Epilepsia	20.5	999	60	6
22950522-a	Pharmacokinetics, safety, and tolerability of GLPG0259, a mitogen-activated protein kinase-activated protein kinase 5 (MAPKAPK5) inhibitor, given as single and multiple doses to healthy male subjects.	Namour F, Vanhoutte FP, Beetens J, Blockhuys S, De Weer M, Wigerinck P.	Drugs R D	999	18	34	22
22950522-b	Pharmacokinetics, safety, and tolerability of GLPG0259, a mitogen-activated protein kinase-activated protein kinase 5 (MAPKAPK5) inhibitor, given as single and multiple doses to healthy male subjects.	Namour F, Vanhoutte FP, Beetens J, Blockhuys S, De Weer M, Wigerinck P.	Drugs R D	999	18	24	22
22950522-c	Pharmacokinetics, safety, and tolerability of GLPG0259, a mitogen-activated protein kinase-activated protein kinase 5 (MAPKAPK5) inhibitor, given as single and multiple doses to healthy male subjects.	Namour F, Vanhoutte FP, Beetens J, Blockhuys S, De Weer M, Wigerinck P.	Drugs R D	999	18	12	22
22950522-d	Pharmacokinetics, safety, and tolerability of GLPG0259, a mitogen-activated protein kinase-activated protein kinase 5 (MAPKAPK5) inhibitor, given as single and multiple doses to healthy male subjects.	Namour F, Vanhoutte FP, Beetens J, Blockhuys S, De Weer M, Wigerinck P.	Drugs R D	999	18	12	22
22950600	Parao-onase enzyme activity is enhanced by zinc supplementation in hemodialysis patients.	Rahimi-Ardabili B, Argani H, Ghorbanihaghjo A, Rashtchizadeh N, Naghavi-Behzad M, Ghorashi S, Nezami N.	Ren Fail	52.8	999	60	9
22950816	Effect of acupuncture therapy for postponing Wallerian degeneration of cerebral infarction as shown by diffusion tensor imaging.	Shen Y, Li M, Wei R, Lou M.	J Altern Complement Med	55	999	20	6
22951179	Efficacy and safety of percutaneous nephrolithotomy (PCNL): a prospective and randomized study comparing regional epidural anesthesia with general anesthesia.	Tangpaitoon T, Nisoog C, Lojanapiwat B.	Int Braz J Urol	54.9	999	50	14
22953514	Implementing virtual microscopy improves outcomes in a hematology morphology course.	Brueggeman MS, Swinehart C, Yue MJ, Conway-Klaassen JM, Wiesner SM.	Clin Lab Sci	26.2	999	44	22
22953994	Does improved functional performance help to reduce urinary incontinence in institutionalized older women? A multicenter randomized clinical trial.	Tak EC, van Hespen A, van Dommelen P, Hopman-Rock M.	BMC Geriatr	84.6	999	155	14
22954459	Comparison of two internet-based interventions for problem drinkers: randomized controlled trial.	Cunningham JA.	J Med Internet Res	45.2	19	170	5
22955172	Single-dose pharmacokinetics of lenalidomide in healthy volunteers: dose proportionality, food effect, and racial sensitivity.	Chen N, Kasserra C, Reyes J, Liu L, Lau H.	Cancer Chemother Pharmacol	32.5	18	15	2
22959217	Long-term use of standardised Ginkgo biloba e-tract for the prevention of Alzheimer's disease (GuidAge): a randomised placebo-controlled trial.	Vellas B, Coley N, Ousset PJ, Berrut G, Dartigues JF, Dubois B, Grandjean H, Pasquier F, Piette F, Robert P, Touchon J, Garnier P, Mathie--Fortunet H, Andrieu S; GuidAge Study Group.	Lancet Neurol	76.3	70	2820	6
22959335	Reduced-intensity conditioning versus standard conditioning before allogeneic haemopoietic cell transplantation in patients with acute myeloid leukaemia in first complete remission: a prospective, open-label randomised phase 3 trial.	BornhÃ¤user M, Kienast J, Trenschel R, Burchert A, Hegenbart U, Stadler M, Baurmann H, SchÃ¤fer-Eckart K, Holler E, Kroger N, Schmid C, Einsele H, Kiehl MG, Hiddemann W, Schwerdtfeger R, Buchholz S, Dreger P, Neubauer A, Berdel WE, Ehninger G, Beelen DW, Schetelig J, et al.	Lancet Oncol	44.5	18	195	2
22961024	Daily disinfection of high-touch surfaces in isolation rooms to reduce contamination of healthcare workers' hands.	Kundrapu S, Sunkesula V, Jury LA, Sitzlar BM, Donskey CJ.	Infect Control Hosp Epidemiol	66.5	999	70	21
22961272	Local administration of growth hormone stimulates tendon collagen synthesis in elderly men.	Vestergaard P, JÃ¸rgensen JO, Olesen JL, Bosnjak E, Holm L, Frystyk J, Langberg H, Kjaer M, Hansen M.	J Appl Physiol	61	999	12	13
22962411	A randomized controlled trial of oral heme iron polypeptide versus oral iron supplementation for the treatment of anaemia in peritoneal dialysis patients: HEMATOCRIT trial.	Barraclough KA, Brown F, Hawley CM, Leary D, Noble E, Campbell SB, Isbel NM, Mudge DW, van Eps CL, Johnson DW.	Nephrol Dial Transplant	59.5	18	54	14
22963812	Effect on walking distance and atherosclerosis progression of a nitric o-ide-donating agent in intermittent claudication.	Gresele P, Migliacci R, Arosio E, Bonizzoni E, Minuz P, Violi F; NC- 4016---208 Study Group.	J Vasc Surg	66.5	40	534	9
22963838	In vitro and in vivo antimicrobial activity of Algerian Hoggar Salvadora persica L. e-tracts against microbial strains from children's oral cavity.	Chelli-Chentouf N, Tir Touil Meddah A, Mullie C, Aoues A, Meddah B.	J Ethnopharmacol	999	6	40	11
22964355	Massage therapy for cardiac surgery patients--a randomized trial.	Braun LA, Stanguts C, Casanelia L, Spitzer O, Paul E, Varda-is NJ, Rosenfeldt F.	J Thorac Cardiovasc Surg	66.7	18	152	9
22964540	Internet-based psychodynamic versus cognitive behavioral guided self-help for generalized an-iety disorder: a randomized controlled trial.	Andersson G, Pa-ling B, Roch-Norlund P, Ã?stman G, Norgren A, Almlov J, Georen L, Breitholtz E, Dahlin M, Cuijpers P, Carlbring P, Silverberg F.	Psychother Psychosom	40.1	18	81	5
22964932	Manual hyperinflation combined with e-piratory rib cage compression for reduction of length of ICU stay in critically ill patients on mechanical ventilation.	Berti JS, Tonon E, Ronchi CF, Berti HW, Stefano LM, Gut AL, Padovani CR, Ferreira AL.	J Bras Pneumol	56.6	18	35	10
22964973	Light fractionation significantly improves the response of superficial basal cell carcinoma to aminolaevulinic acid photodynamic therapy: five-year follow-up of a randomized, prospective trial.	de Vijlder HC, Sterenborg HJ, Neumann HA, Robinson DJ, de Haas ER.	Acta Derm Venereol	59.8	999	195	2
22965699	Clinical study of western medicine combined with Chinese medicine based on syndrome differentiation in the patients with polarized hypertension.	Chen SL, Liu -Y, -u WM, Mei WY, Chen -L.	Chin J Integr Med	68	60	125	9
22965757	Decreased plasma cholesterol concentrations after PUFA-rich diets are not due to reduced cholesterol absorption/synthesis.	Ramprasath VR, Jones PJ, Buckley DD, Woollett LA, Heubi JE.	Lipids	26.5	18	17	5
22966034	Five-year follow-up of harms and benefits of behavioral infant sleep intervention: randomized trial.	Price AM, Wake M, Ukoumunne OC, Hiscock H.	Pediatrics	0.4	999	326	6
22966839	Whole-body vibration for functional constipation: a single-centre, single-blinded, randomized controlled trial.	Wu TJ, Wei TS, Chou YH, Yang CP, Wu CL, Chen YC, Liu SY.	Colorectal Dis	35.2	999	27	11
22968159	Nebulized hypertonic saline containing hyaluronic acid improves tolerability in patients with cystic fibrosis and lung disease compared with nebulized hypertonic saline alone: a prospective, randomized, double-blind, controlled study.	Furnari ML, Termini L, Traverso G, Barrale S, Bonaccorso MR, Damiani G, Piparo CL, Collura M.	Ther Adv Respir Dis	23.3	10	30	10
22968626	Phase III randomized trial of toremifene versus tamo-ifen for Japanese postmenopausal patients with early breast cancer.	Kimura M, Tominaga T, Kimijima I, Takatsuka Y, Takashima S, Nomura Y, Kasumi F, Yamaguchi A, Masuda N, Noguchi S, Eshima N.	Breast Cancer	63	999	252	2
22971499	Target-controlled infusion of remifentanil for laryngeal mask airway insertion during sevoflurane induction in adults.	Kwak HJ, Chae YJ, Lee KC, Kim JY.	J Int Med Res	37.7	18	100	22
22971901	Results of a randomized controlled trial testing the efficacy of a culturally targeted and a generic video on mammography screening among chinese-american immigrants.	Wang JH, Schwartz MD, Brown RL, Ma-well AE, Lee MM, Adams IF, Mandelblatt JS.	Cancer Epidemiol Biomarkers Prev	55.8	40	571	2
22972968	Health-related quality-of-life findings for the prostate cancer prevention trial.	Moinpour CM, Darke AK, Donaldson GW, Cespedes D, Johnson CR, Ganz PA, Patrick DL, Ware JE Jr, Shumaker SA, Meyskens FL, Thompson IM Jr.	J Natl Cancer Inst	63.1	55	16077	2
22973092	Once-daily NVA237 improves e-ercise tolerance from the first dose in patients with COPD: the GLOW3 trial.	Beeh KM, Singh D, Di Scala L, Drollmann A.	Int J Chron Obstruct Pulmon Dis	60.5	40	108	10
22975616	Phase 3 trial of postoperative chemotherapy alone versus chemoradiation therapy in stage III-IV gastric cancer treated with R0 gastrectomy and D2 lymph node dissection.	Kim TH, Park SR, Ryu KW, Kim YW, Bae JM, Lee JH, Choi IJ, Kim YJ, Kim DY.	Int J Radiat Oncol Biol Phys	999	999	90	2
22980168	Effect of different apical preparation sizes on outcome of primary endodontic treatment: a randomized controlled trial.	Saini HR, Tewari S, Sangwan P, Duhan J, Gupta A.	J Endod	28.6	18	129	22
22980429	Vaginal acidity enhancement with a 3% acetic acid gel prior to misoprostol treatment for pregnancy termination in the midtrimester.	Abd-El-Maeboud KH, Ghazy A, Ibrahim A, Hassan N, El-Bohoty A, Gamal-El-Din I.	Int J Gynaecol Obstet	26.3	18	47	15
22980639	Effect of femtosecond laser fragmentation of the nucleus with different softening grid sizes on effective phaco time in cataract surgery.	Conrad-Hengerer I, Hengerer FH, Schultz T, Dick HB.	J Cataract Refract Surg	71.5	22	160	7
22984173	Golimumab monotherapy in Japanese patients with active rheumatoid arthritis despite prior treatment with disease-modifying antirheumatic drugs: results of the phase 2/3, multicentre, randomised, double-blind, placebo-controlled GO-MONO study through 24 weeks.	Takeuchi T, Harigai M, Tanaka Y, Yamanaka H, Ishiguro N, Yamamoto K, Miyasaka N, Koike T, Kanazawa M, Oba T, Yoshinari T, Baker D; the GO-MONO study group.	Ann Rheum Dis	52.3	20	308	13
22984272	Infli-imab is associated with improvement in arterial stiffness in patients with early rheumatoid arthritis -- a randomized trial.	Tam LS, Shang Q, Li EK, Wang S, Li RJ, Lee KL, Leung YY, Ying KY, Yim CW, Kun EW, Leung MH, Li M, Li TK, Zhu TY, Chui RK, Tseung L, Yu SL, Kuan WP, Yu CM.	J Rheumatol	53	18	40	13
22986757	Four-year-old outcomes of a universal infant-toddler shared reading intervention: the let's read trial.	Goldfeld S, Quach J, Nicholls R, Reilly S, Ukoumunne OC, Wake M.	Arch Pediatr Adolesc Med	0.2	0.1	630	5
22987022	Safety of atomo-etine in combination with intravenous cocaine in cocaine-e-perienced participants.	Cantilena L, Kahn R, Duncan CC, Li SH, Anderson A, Elkashef A.	J Addict Med	40	18	20	5
22989894	Smartphone versus pen-and-paper data collection of infant feeding practices in rural China.	Zhang S, Wu Q, van Velthoven MH, Chen L, Car J, Rudan I, Zhang Y, Li Y, Scherpbier RW.	J Med Internet Res	999	999	120	21
22990062	Bipolar transurethral resection of the prostate causes deeper coagulation depth and less bleeding than monopolar transurethral prostatectomy.	Huang -, Wang L, Wang -H, Shi HB, Zhang -J, Yu ZY.	Urology	64.8	50	136	14
22990716	Acarbose treatment enhances mid-regional pro-atrial natriuretic peptide concentrations in non-diabetic individuals: further evidence for a common cardiometabolic pathway?	Rudovich N, Pivovarova O, Traberth A, Sparwasser A, Weickert MO, Bernigau W, Birkenfeld AL, Arafat AM, Bergmann A, Pfeiffer AF.	Diabetologia	58.3	999	55	4
22992449	The effect of empowerment on the self-efficacy, quality of life and clinical and laboratory indicators of patients treated with hemodialysis: a randomized controlled trial.	Moattari M, Ebrahimi M, Sharifi N, Rouzbeh J.	Health Qual Life Outcomes	38	18	48	21
22995877	Early aggressive versus initially conservative treatment in elderly patients with non-ST-segment elevation acute coronary syndrome: a randomized controlled trial.	Savonitto S, Cavallini C, Petronio AS, Murena E, Antonicelli R, Sacco A, Steffenino G, Bonechi F, Mossuti E, Manari A, Tolaro S, Toso A, Daniotti A, Piscione F, Morici N, Cesana BM, Jori MC, De Servi S; Italian Elderly ACS Trial Investigators.	JACC Cardiovasc Interv	81.8	75	313	9
22995879	Outcomes of patients with prior coronary artery bypass grafting and acute coronary syndromes: analysis from the ACUITY (Acute Catheterization and Urgent Intervention Triage Strategy) trial.	Nikolsky E, McLaurin BT, Co- DA, Manoukian SV, -u K, Mehran R, Stone GW.	JACC Cardiovasc Interv	63	18	13764	9
22996370	Tumor stem cell antigens as consolidative active specific immunotherapy: a randomized phase II trial of dendritic cells versus tumor cells in patients with metastatic melanoma.	Dillman RO, Cornforth AN, Depriest C, McClay EF, Amatruda TT, de Leon C, Ellis RE, Mayorga C, Carbonell D, Cubellis JM.	J Immunother	57.2	999	42	2
22998339	A randomized trial of sugar-sweetened beverages and adolescent body weight.	Ebbeling CB, Feldman HA, Chomitz VR, Antonelli TA, Gortmaker SL, Osganian SK, Ludwig DS.	N Engl J Med	15.2	999	224	4
22998554	Cardiorespiratory fitness and heart rate recovery in obese premenopausal women.	Carroll S, Marshall P, Ingle L, Borkoles E.	Scand J Med Sci Sports	40.2	999	61	4
22999835	Assessing the effects of Families for Safe Dates, a family-based teen dating abuse prevention program.	Foshee VA, McNaughton Reyes HL, Ennett ST, Cance JD, Bauman KE, Bowling JM.	J Adolesc Health	999	13	324	5
23003106	The impact of calcineurin inhibitors on insulin sensitivity and insulin secretion: a randomized crossover trial in uraemic patients.	Ozbay LA, MÃ¸ller N, Juhl C, Bjerre M, Carstens J, Rungby J, JÃ¸rgensen KA.	Diabet Med	47	999	8	4
23003211	A comparison of the pelvic angle applied using lateral table tilt or a pelvic wedge at elective caesarean section.	Kinsella SM, Harvey NL.	Anaesthesia	31.6	999	35	15
23006736	Uric acid reduction rectifies prehypertension in obese adolescents.	Soletsky B, Feig DI.	Hypertension	14.3	11	60	9
23014711	Efficacy and safety of prophyla-is with once-weekly BAY 79-4980 compared with thrice-weekly rFVIII-FS in haemophilia A patients. A randomised, active-controlled, double-blind study.	Powell J, Martinowitz U, Windyga J, Di Minno G, Hellmann A, Pabinger I, Maas Enriquez M, Schwartz L, Ingerslev J; LipLong Study Investigators.	Thromb Haemost	33.6	12	131	3
23015569	The clinical and radiological outcome of pulsed electromagnetic field treatment for acute scaphoid fractures: a randomised double-blind placebo-controlled multicentre trial.	Hannemann PF, Gottgens KW, van Wely BJ, Kolkman KA, Werre AJ, Poeze M, Brink PR.	J Bone Joint Surg Br	40.7	18	53	13
23015619	Magnetic resonance imaging study of the in vivo position of the e-traglottic airway devices i-gelâ?¢ and LMA-Supremeâ?¢ in anaesthetized human volunteers.	Russo SG, Cremer S, Eich C, Jipp M, Cohnen J, Strack M, Quintel M, Mohr A.	Br J Anaesth	25.8	18	12	22
23016532	A skincare containing retinol adenosine and hyaluronic acid optimises the benefits from a type A botulinum to-in injection.	Ascher B, Fanchon C, Kanoun-Copy L, Bouloc A, Benech F.	J Cosmet Laser Ther	48.2	999	45	12
23017309	Effects of omega-3 fatty acids supplementation on serum adiponectin levels and some metabolic risk factors in women with polycystic ovary syndrome.	Mohammadi E, Rafraf M, Farzadi L, Asghari-Jafarabadi M, Sabour S.	Asia Pac J Clin Nutr	27.5	20	61	4
23018805	Who should have surgery for spinal stenosis? Treatment effect predictors in SPORT.	Pearson A, Lurie J, Tosteson T, Zhao W, Abdu W, Weinstein JN.	Spine (Phila Pa 1976)	999	999	634	13
23019296	A prospective randomized multicentre study comparing vaginal progesterone gel and vaginal micronized progesterone tablets for luteal support after in vitro fertilization/intracytoplasmic sperm injection.	Bergh C, Lindenberg S; Nordic Crinone Study Group.	Hum Reprod	31.8	18	1983	15
23020264	Effectiveness of intravenous de-amethasone versus propofol for pain relief in the migraine headache: a prospective double blind randomized clinical trial.	Soleimanpour H, Ghafouri RR, Taheraghdam A, Aghamohammadi D, Negargar S, Golzari SE, Abbasnezhad M.	BMC Neurol	36	18	90	6
23020674	Changes in the photoplethysmogram with tracheal intubation and remifentanil concentration.	Wang -, Chen -, Ye S, Feng Y, Huang C, Hou L, Liu J, Chen H.	Anaesthesia	41	999	50	22
23021528	Comparison of ropivacaine, bupivacaine and lidocaine in the management of post-tonsillectomy pain.	OzkiriÅ? M, Kapusuz Z, Saydam L.	Int J Pediatr Otorhinolaryngol	8.1	999	120	10
23022248	Perioperative supplementation with ascorbic acid does not prevent atrial fibrillation in coronary artery bypass graft patients.	Bjordahl PM, Helmer SD, Gosnell DJ, Wemmer GE, O'Hara WW, Milfeld DJ.	Am J Surg	63	18	185	9
23022391	Dose-dependent efficacy of the Vite- agnus castus e-tract Ze 440 in patients suffering from premenstrual syndrome.	Schellenberg R, Zimmermann C, Drewe J, Hoe-ter G, Zahner C.	Phytomedicine	30.8	18	162	14
23026173	Combinations of fentanyl and levobupivacaine for post-thoracotomy pain.	Tekelioglu UY, Gurses EL, Serin S, Sungurtekin H.	Acta Anaesthesiol Taiwan	47.4	20	60	10
23032552	Me-iletine for symptoms and signs of myotonia in nondystrophic myotonia: a randomized controlled trial.	Statland JM, Bundy BN, Wang Y, Rayan DR, Trivedi JR, Sansone VA, Salajegheh MK, Venance SL, Ciafaloni E, Matthews E, Meola G, Herbelin L, Griggs RC, Barohn RJ, Hanna MG; Consortium for Clinical Investigation of Neurologic Channelopathies.	JAMA	42.9	16	59	6
23032585	Does subacromial injection of a local anesthetic influence strength in healthy shoulders?: a double-blinded, placebo-controlled study.	Farshad M, Jundt-Ecker M, Sutter R, Schubert M, Gerber C.	J Bone Joint Surg Am	999	18	10	13
23034965	Long-chain n-3 PUFAs reduce adipose tissue and systemic inflammation in severely obese nondiabetic patients: a randomized controlled trial.	Itariu BK, Zeyda M, Hochbrugger EE, Neuhofer A, Prager G, Schindler K, Bohdjalian A, Mascher D, Vangala S, Schranz M, Krebs M, Bischof MG, Stulnig TM.	Am J Clin Nutr	38.5	20	55	4
23041995	Randomized trial of aloe vera gel vs triamcinolone acetonide ointment in the treatment of oral lichen planus.	Reddy RL, Reddy RS, Ramesh T, Singh TR, Swapna LA, La-mi NV.	Quintessence Int	999	999	40	12
23042893	The efficacy of student-centered instruction in supporting science learning.	Granger EM, Bevis TH, Saka Y, Southerland SA, Sampson V, Tate RL.	Science	999	999	2594	22
23043090	Classroom based cognitive behavioural therapy in reducing symptoms of depression in high risk adolescents: pragmatic cluster randomised controlled trial.	Stallard P, Sayal K, Phillips R, Taylor JA, Spears M, Anderson R, Araya R, Lewis G, Millings A, Montgomery AA.	BMJ	14	12	5030	5
23043755	Use of a sealant to prevent prolonged air leaks after lung resection: a prospective randomized study.	Lequaglie C, Giudice G, Marasco R, Morte AD, Gallo M.	J Cardiothorac Surg	66.4	18	222	10
23044180	Blood sample tube transporting system versus point of care technology in an emergency department; effect on time from collection to reporting? A randomised trial.	NÃ¸rgaard B, Mogensen CB.	Scand J Trauma Resusc Emerg Med	999	999	319	19
23045543	Randomized controlled trial of patient navigation for newly diagnosed cancer patients: effects on quality of life.	Hendren S, Griggs JJ, Epstein R, Humiston S, Jean-Pierre P, Winters P, Sanders M, Loader S, Fiscella K.	Cancer Epidemiol Biomarkers Prev	57	999	319	2
23045575	Efficacy of cognitive behavioral therapy and physical e-ercise in alleviating treatment-induced menopausal symptoms in patients with breast cancer: results of a randomized, controlled, multicenter trial.	Duijts SF, van Beurden M, Oldenburg HS, Hunter MS, Kieffer JM, Stuiver MM, Gerritsma MA, Menke-Pluymers MB, Plaisier PW, Rijna H, Lopes Cardozo AM, Timmers G, van der Meij S, van der Veen H, Bijker N, de Widt-Levert LM, Geenen MM, Heuff G, van Dulken EJ, Boven E, Aaronson NK.	J Clin Oncol	48.2	999	422	2
23046330	Adjunctive ultrasonography to minimize iodinated contrast administration during carotid artery stenting: a randomized trial.	Varcoe RL, Nammuni I, Lenno- AF, Yang JL, Crowe P, Walsh WR.	J Endovasc Ther	72.8	18	22	9
23046564	Comparison between the AA/EPA ratio in depressed and non depressed elderly females: omega-3 fatty acid supplementation correlates with improved symptoms but does not change immunological parameters.	Rizzo AM, Corsetto PA, Montorfano G, Opizzi A, Faliva M, Giacosa A, Ricevuti G, Pelucchi C, Berra B, Rondanelli M.	Nutr J	84	65	46	5
23049274	A randomized controlled trial of preprocedure administration of pareco-ib for therapeutic endoscopic retrograde cholangiopancreatography.	Amornyotin S, Chalayonnawin W, Kongphlay S.	J Pain Res	59.5	18	85	11
23050945	No changes of cholesterol levels with a commercially available glucosamine product in patients treated with lipid lowering drugs: a controlled, randomised, open cross-over trial.	Eggertsen R, Andreasson A, Andren L.	BMC Pharmacol To-icol	66.4	999	34	4
23051991	Safety and efficacy of NA-1 in patients with iatrogenic stroke after endovascular aneurysm repair (ENACT): a phase 2, randomised, double-blind, placebo-controlled trial.	Hill MD, Martin RH, Mikulis D, Wong JH, Silver FL, Terbrugge KG, Milot G, Clark WM, Macdonald RL, Kelly ME, Boulton M, Fleetwood I, McDougall C, Gunnarsson T, Chow M, Lum C, Dodd R, Poublanc J, Krings T, Demchuk AM, Goyal M, Anderson R, et al.	Lancet Neurol	56.9	18	185	9
23060723	A three-year follow-up of intravitreal triamcinolone acetonide injection and macular laser photocoagulation for diffuse diabetic macular edema.	Cho HY, Kang SW, Kim YT, Chung SE, Lee SW.	Korean J Ophthalmol	59.1	999	74	7
23063375	Pharmacokinetic properties of mirabegron, a Î²3-adrenoceptor agonist: results from two phase I, randomized, multiple-dose studies in healthy young and elderly men and women.	Krauwinkel W, van Dijk J, Schaddelee M, Eltink C, Meijer J, Strabach G, van Marle S, Kerbusch V, van Gelderen M.	Clin Ther	69	65	32	22
23070151	Short-term monotherapy with ID-184, a liver-targeted nucleotide polymerase inhibitor, in patients with chronic hepatitis C virus infection.	Lalezari J, Asmuth D, CasirÃ³ A, Vargas H, Lawrence S, Dubuc-Patrick G, Chen J, McCarville J, Pietropaolo K, Zhou -J, Sullivan-BÃ³lyai J, Mayers D.	Antimicrob Agents Chemother	48	18	41	1
23070267	Zonisamide for Weight Reduction in Obese Adults: A 1-Year Randomized Controlled Trial.	Gadde KM, Kopping MF, Wagner HR, Yonish GM, Allison DB, Bray GA.	Arch Intern Med	43.3	18	225	4
23070488	Impaired insulin signaling in human adipocytes after experimental sleep restriction: a randomized, crossover study.	Broussard JL, Ehrmann DA, Van Cauter E, Tasali E, Brady MJ.	Ann Intern Med	23.7	18	7	4
23071528	Low-dose oral sirolimus and the risk of menstrual-cycle disturbances and ovarian cysts: analysis of the randomized controlled SUISSE ADPKD trial.	Braun M, Young J, Reiner CS, Poster D, Krauer F, Kistler AD, Kristanto P, Wang -, Liu Y, Loffing J, Andreisek G, von Eckardstein A, Senn O, Wuthrich RP, Serra AL.	PLoS One	31.5	18	39	14
23075127	Hydro-yethyl starch or saline for fluid resuscitation in intensive care.	Myburgh JA, Finfer S, Bellomo R, Billot L, Cass A, Gattas D, Glass P, Lipman J, Liu B, McArthur C, McGuinness S, Rajbhandari D, Taylor CB, Webb SA; CHEST Investigators; Australian and New Zealand Intensive Care Society Clinical Trials Group.	N Engl J Med	63	18	6742	22
23075427	A randomised control trial of physical activity in a perceived environment on self-esteem and mood in UK adolescents.	Wood C, Angus C, Pretty J, Sandercock G, Barton J.	Int J Environ Health Res	13.1	999	25	5
23075701	Oral sapacitabine for the treatment of acute myeloid leukaemia in elderly patients: a randomised phase 2 study.	Kantarjian H, Faderl S, Garcia-Manero G, Luger S, Venugopal P, Maness L, Wetzler M, Coutre S, Stock W, Cla-ton D, Goldberg SL, Arellano M, Strickland SA, Seiter K, Schiller G, Jabbour E, Chiao J, Plunkett W.	Lancet Oncol	77	70	107	2
23075703	A randomized comparison of second-line lopinavir/ritonavir monotherapy versus tenofovir/lamivudine/lopinavir/ritonavir in patients failing NNRTI regimens: the HIV STAR study.	Bunupuradah T, Chetchotisakd P, Ananworanich J, Munsakul W, Jirajariyavej S, Kantipong P, Prasithsirikul W, Sungkanuparph S, Bowonwatanuwong C, Klinbuayaem V, Kerr SJ, Sophonphan J, Bhakeecheep S, Hirschel B, Ru-rungtham K; HIV STAR Study Group.	Antivir Ther	37.5	18	195	1
23080351	The pharmacokinetics and pharmacodynamics of liposome bupivacaine administered via a single epidural injection to healthy volunteers.	Viscusi ER, Candiotti KA, Onel E, Morren M, Ludbrook GL.	Reg Anesth Pain Med	25.7	18	30	22
23083041	Evaluation of pulsed electromagnetic field therapy in the management of patients with discogenic lumbar radiculopathy.	Omar AS, Awadalla MA, El-Latif MA.	Int J Rheum Dis	38.8	25	40	13
23090523	Hydrocodone-acetaminophen for pain control in first-trimester surgical abortion: a randomized controlled trial.	Micks EA, Edelman AB, Renner RM, Fu R, Lambert WE, Bednarek PH, Nichols MD, Beckley EH, Jensen JT.	Obstet Gynecol	25.4	18	121	15
23094034	A booklet on participants' rights to improve consent for clinical research: a randomized trial.	Benatar JR, Mortimer J, Stretton M, Stewart RA.	PLoS One	65.7	18	282	21
23097240	Effects of ketoconazole treatment on the pharmacokinetics of safinamide and its plasma metabolites in healthy adult subjects.	Krosser S, Marquet A, Gallemann D, Wolna P, Fauchou- N, Hermann R, Johne A.	Biopharm Drug Dispos	40.7	18	89	6
23097606	Right atrial preference pacing algorithm in the prevention of paro-ysmal atrial fibrillation in myotonic dystrophy type 1 patients: a long term follow-up study.	Nigro G, Russo V, Rago A, Antonio Papa A, Palladino A, Politano L.	Acta Myol	51.3	999	40	9
23097968	Comparison of the motor and sensory block by ropivacaine and bupivacaine in combination with lidocaine in interscalene block.	Nishiyama T.	Med Arh	48.8	20	100	22
23098412	Altitude Sickness in Climbers and Efficacy of NSAIDs Trial (ASCENT): randomized, controlled trial of ibuprofen versus placebo for prevention of altitude illness.	Gertsch JH, Corbett B, Holck PS, Mulcahy A, Watts M, Stillwagon NT, Casto AM, Abramson CH, Vaughan CP, Macguire C, Farzan NN, Vo BN, Norvelle RJ, May K, Holly JE, Irons H, Stutz AM, Chapagain P, Yadav S, Pun M, Farrar J, Basnyat B.	Wilderness Environ Med	37	18	232	19
23100167	Pharmacokinetics of a fi-ed-dose combination of mitiglinide and metformin versus concurrent administration of individual formulations in healthy subjects: a randomized, open-label, two-treatment, two-period, two-sequence, single-dose, crossover study.	Jung JA, Kim JR, Kim SR, Kim TE, Lee SY, Ko JW, Huh W.	Clin Drug Investig	27	20	24	4
23102530	End-e-piratory lung volume recovers more slowly after closed endotracheal suctioning than after open suctioning: a randomized crossover study.	Corley A, Spooner AJ, Barnett AG, Caruana LR, Hammond NE, Fraser JF.	J Crit Care	55.5	18	20	10
23102619	Resveratrol supplementation does not improve metabolic function in nonobese women with normal glucose tolerance.	Yoshino J, Conte C, Fontana L, Mittendorfer B, Imai S, Schechtman KB, Gu C, Kunz I, Rossi Fanelli F, Patterson BW, Klein S.	Cell Metab	59	999	29	4
23103036	Effects of radial versus femoral artery access in patients with acute coronary syndromes with or without ST-segment elevation.	Mehta SR, Jolly SS, Cairns J, Niemela K, Rao SV, Cheema AN, Steg PG, Cantor WJ, DÅ¾avÃ­k V, Budaj A, Rokoss M, Valentin V, Gao P, Yusuf S; RIVAL Investigators.	J Am Coll Cardiol	62	999	7021	9
23104230	The effects of a mid-winter 8-week course of sub-sunburn sunbed e-posures on tanning, vitamin D status and colds.	de Gruijl FR, Pavel S.	Photochem Photobiol Sci	21.7	18	105	12
23106871	A randomized controlled trial of postoperative tumor lysate-pulsed dendritic cells and cytokine-induced killer cells immunotherapy in patients with localized and locally advanced renal cell carcinoma.	Zhan HL, Gao -, Pu -Y, Li W, Li ZJ, Zhou -F, Qiu JG.	Chin Med J (Engl)	53.5	18	137	2
23107470	Effects of comprehensive therapy based on traditional Chinese medicine patterns in stable chronic obstructive pulmonary disease: a four-center, open-label, randomized, controlled study.	Li SY, Li JS, Wang MH, -ie Y, Yu -Q, Sun ZK, Ma LJ, Zhang W, Zhang HL, Cao F, Pan YC.	BMC Complement Altern Med	63.7	40	306	10
23110444	Clinically relevant pain relief with an ibuprofen-releasing foam dressing: results from a randomized, controlled, double-blind clinical trial in e-uding, painful venous leg ulcers.	Fogh K, Andersen MB, Bischoff-Mikkelsen M, Bause R, Zutt M, Schilling S, Schmutz JL, Borbujo J, Jimenez JA, Cartier H, JÃ¸rgensen B.	Wound Repair Regen	70.6	18	120	12
23110471	Olmesarta-mlodipine/hydrochlorothiazide in participants with hypertension and diabetes, chronic kidney disease, or chronic cardiovascular disease: a subanalysis of the multicenter, randomized, double-blind, parallel-group TRINITY study.	Kereiakes DJ, Chrysant SG, Izzo JL Jr, Littlejohn T 3rd, Melino M, Lee J, Fernandez V, Heyrman R.	Cardiovasc Diabetol	61.1	18	2492	4
23111148	Medical-grade honey does not reduce skin colonization at central venous catheter-insertion sites of critically ill patients: a randomized controlled trial.	Kwakman PH, Muller MC, Binnekade JM, van den Akker JP, de Borgie CA, Schultz MJ, Zaat SA.	Crit Care	63	999	235	19
23113436	Mission essential fitness: comparison of functional circuit training to traditional Army physical training for active duty military.	Heinrich KM, Spencer V, Fehl N, Poston WS.	Mil Med	27.6	999	56	5
23113779	Addressing weight gain in smoking cessation treatment: a randomized controlled trial.	Bush T, Levine MD, Beebe LA, Cerutti B, Deprey M, McAfee T, Boeckman L, Zbikowski S.	Am J Health Promot	41.3	18	1002	5
23115195	Cognitive-affective neural plasticity following active-controlled mindfulness intervention.	Allen M, Dietz M, Blair KS, van Beek M, Rees G, Vestergaard-Poulsen P, Lutz A, Roepstorff A.	J Neurosci	26.5	18	61	6
23118535	Randomized trial of pragmatic education for low-risk COPD patients: impact on hospitalizations and emergency department visits.	Siddique HH, Olson RH, Parenti CM, Rector TS, Caldwell M, Dewan NA, Rice KL.	Int J Chron Obstruct Pulmon Dis	70	999	4425	10
23122434	Effect of a high-density foam seating wedge on back pain intensity when used by 14 to 16-year-old school students: a randomised controlled trial.	Candy EA, Farewell D, Jerosch-Herold C, Shepstone L, Watts RA, Stephenson RC.	Physiotherapy	14.8	14	97	13
23126260	Impact of electroacupuncture on quality of life for patients with Relapsing-Remitting Multiple Sclerosis under treatment with immunomodulators: a randomized study.	Quispe-Cabanillas JG, Damasceno A, von Glehn F, BrandÃ£o CO, Damasceno BP, Silveira WD, Santos LM.	BMC Complement Altern Med	38	999	31	6
23127448	Use of Redon drains in primary total hip arthroplasty has no clinically relevant benefits.	von Roth P, Perka C, Dirschedl K, Mayr HO, Ensthaler L, Preininger B, Hube R.	Orthopedics	63.9	999	80	13
23128818	Comparison of parturient - controlled remifentanil with epidural bupivacain and sufentanil for labour analgesia: Randomised controlled trial.	Stourac P, Suchomelova H, Stodulkova M, Huser M, Krikava I, Janku P, Haklova O, Hakl L, Stoudek R, Gal R, Sevcik P.	Biomed Pap Med Fac Univ Palacky Olomouc Czech Repub	28.7	999	24	15
23131078	Ultrafiltration in decompensated heart failure with cardiorenal syndrome.	Bart BA, Goldsmith SR, Lee KL, Givertz MM, O'Connor CM, Bull DA, Redfield MM, Deswal A, Rouleau JL, LeWinter MM, Ofili EO, Stevenson LW, Semigran MJ, Felker GM, Chen HH, Hernandez AF, Anstrom KJ, McNulty SE, Velazquez EJ, Ibarra JC, Mascette AM, Braunwald E; et al.	N Engl J Med	67.5	999	188	9
23131367	Argentine tango dance compared to mindfulness meditation and a waiting-list control: a randomised trial for treating depression.	Pinniger R, Brown RF, Thorsteinsson EB, McKinley P.	Complement Ther Med	44.4	18	97	5
23132474	Postoperative nausea and vomiting in patients undergoing total abdominal hysterectomy under subarachnoid block: a randomized study of de-amethasone prophyla-is.	Khatiwada S, Bhattarai B, Biswas BK, Pokharel K, Acharya R, Singh SN, Uprety D.	Kathmandu Univ Med J (KUMJ)	44.5	999	80	14
23135976	Effect of bispectral inde- monitoring on e-tubation time and analgesic consumption in abdominal surgery: a randomised clinical trial.	Persec J, Persec Z, Kopljar M, Sojcic N, Husedzinovic I.	Swiss Med Wkly	65	18	40	11
23137206	The effects of three training methods endurance, resistance and concurrent on adiponectin resting levels in overweighed untrained men.	Asad M, Ravasi AA, Faramarzi M, Pournemati P.	Bratisl Lek Listy	22.5	999	44	5
23139970	Tubed vs tubeless PCNL in children.	Samad L, Zaidi Z.	J Pak Med Assoc	6.8	999	54	14
23142302	Impact of anti-orthopo-virus neutralizing antibodies induced by a heterologous prime-boost HIV-1 vaccine on insert-specific immune responses.	Walsh SR, Seaman MS, Grandpre LE, Charbonneau C, Yanosick KE, Metch B, Keefer MC, Dolin R, Baden LR.	Vaccine	999	999	150	1
23144893	Caffeine improves left hemisphere processing of positive words.	Kuchinke L, Lu- V.	PLoS One	24.3	999	66	5
23149528	Promoting safe prescribing in primary care with a contraceptive vital sign: a cluster-randomized controlled trial.	Schwarz EB, Parisi SM, Williams SL, Shevchik GJ, Hess R.	Ann Fam Med	33.3	18	2478	21
23152839	Randomized, placebo-controlled trial of mipomersen in patients with severe hypercholesterolemia receiving ma-imally tolerated lipid-lowering therapy.	McGowan MP, Tardif JC, Ceska R, Burgess LJ, Soran H, Gouni-Berthold I, Wagener G, Chasan-Taber S.	PLoS One	50.5	999	58	4
23155432	Early versus delayed insertion of intrauterine contraception after medical abortion - a randomized controlled trial.	SÃ¤Ã¤v I, Stephansson O, Gemzell-Danielsson K.	PLoS One	31.7	18	116	15
23155956	Effect of gabapentin on postoperative pain and operation complications: a randomized placebo controlled trial.	Behdad S, Ayatollahi V, Bafghi AT, Tezerjani MD, Abrishamkar M.	West Indian Med J	47	20	61	14
23157714	The effect of a trunk release maneuver on Peak Pressure Inde-, trunk displacement and perceived discomfort in older adults seated in a High Fowler's position: a randomized controlled trial.	Best KL, Desharnais G, Boily J, Miller WC, Camp PG.	BMC Geriatr	67.4	60	117	13
23159254	Cigarette warning label policy alternatives and smoking-related health disparities.	Thrasher JF, Carpenter MJ, Andrews JO, Gray KM, Alberg AJ, Navarro A, Friedman DB, Cummings KM.	Am J Prev Med	999	18	981	21
23165580	Randomised, double-blind and placebo-controlled study of the effect of a synbiotic dairy product on orocecal transit time in healthy adult women.	Malpeli A, GonzÃ¡lez S, Vicentin D, ApÃ¡s A, GonzÃ¡lez HF.	Nutr Hosp	40.7	999	83	11
23165659	Effect of testosterone replacement on response to sildenafil citrate in men with erectile dysfunction: a parallel, randomized trial.	Spitzer M, Basaria S, Travison TG, Davda MN, Paley A, Cohen B, Mazer NA, Knapp PE, Hanka S, Lakshman KM, Ulloor J, Zhang A, Orwoll K, Eder R, Collins L, Mohammed N, Rosen RC, DeRogatis L, Bhasin S.	Ann Intern Med	54.9	40	140	14
23166425	Inhalation therapy of calcitonin relieves osteoarthritis of the knee.	Armagan O, Serin DK, Calisir C, Dokumacioglu A, Ozgen M, Oner S, Alatas O.	J Korean Med Sci	61.6	999	50	13
23170816	Novel electronic refreshers for cardiopulmonary resuscitation: a randomized controlled trial.	Magura S, Miller MG, Michael T, Bensley R, Burkhardt JT, Puente AC, Sullins C.	BMC Emerg Med	35.1	999	326	21
23170921	Comparison between the recovery time of alfentanil and fentanyl in balanced propofol sedation for gastrointestinal and colonoscopy: a prospective, randomized study.	Ho WM, Yen CM, Lan CH, Lin CY, Yong SB, Hwang KL, Chou MC.	BMC Gastroenterol	52.9	20	260	11
23170936	Increased circulating CC chemokine levels in the metabolic syndrome are reduced by low-dose atorvastatin treatment: evidence from a randomized controlled trial.	Loughrey BV, McGinty A, Young IS, McCance DR, Powell LA.	Clin Endocrinol (O-f)	48.6	35	76	4
23171095	Long-term comparison of endovascular and open repair of abdominal aortic aneurysm.	Lederle FA, Freischlag JA, Kyriakides TC, Matsumura JS, Padberg FT Jr, Kohler TR, Kougias P, Jean-Claude JM, Cikrit DF, Swanson KM; OVER Veterans Affairs Cooperative Study Group.	N Engl J Med	70	999	881	9
23172001	A Randomized Controlled Trial of Bibliotherapy for Carers of Young People With First-Episode Psychosis.	McCann TV, Lubman DI, Cotton SM, Murphy B, Crisp K, Catania L, Marck C, Gleeson JF.	Schizophr Bull	47.2	999	124	5
23172405	Effect of supervision on ultrasonographic measurements. A blinded randomized cross-over study.	Ozcakar L, Kara M, Tekin L, Karanfil Y, Esen E, Utku B, Can Guven S, CaÄ?layan G, Youssefi A, Pitruzzella M, Ciocchetti E, Acikel C.	Eur J Phys Rehabil Med	999	999	9	13
23173755	Comparative study between Levobupivacaine and Bupivacaine for hernia surgery in the elderly.	Compagna R, Vigliotti G, Coretti G, Amato M, Aprea G, Puzziello A, Militello C, Iacono F, Prezioso D, Amato B.	BMC Surg	75	65	40	11
23174471	The effects of lisde-amfetamine dimesylate on driving behaviors in young adults with ADHD assessed with the Manchester driving behavior questionnaire.	Biederman J, Fried R, Hammerness P, Surman C, Mehler B, Petty CR, Faraone SV, Miller C, Bourgeois M, Meller B, Godfrey KM, Baer L, Reimer B.	J Adolesc Health	21.6	18	69	5
23176888	Early interventional treatment with intranasal corticosteroids compared with postonset treatment in pollinosis.	Higaki T, Okano M, Makihara S, Fujiwara T, Haruna T, Noda Y, Kariya S, Nishizaki K.	Ann Allergy Asthma Immunol	35.6	16	74	10
23177225	Electrical stimulation and splinting were not clearly more effective than splinting alone for contracture management after acquired brain injury: a randomised trial.	Leung J, Harvey LA, Moseley AM, Tse C, Bryant J, Wyndham S, Barry S.	J Physiother	57	999	36	6
23178468	Randomized, Placebo-controlled Study of the Efficacy of Preoperative Somatostatin Administration in the Prevention of Postoperative Complications Following Pancreaticoduodenectomy.	Wang W, Tian B, Babu SR, Zhang Y.	Hepatogastroenterology	51	999	60	11
23180520	Comparison of right ventricular ape- and right ventricular outflow tract septum pacing in the elderly with normal left ventricular ejection fraction: long-term follow-up.	Zhang H-, Qian J, Hou FQ, Liu YN, Mao JH.	Kardiol Pol	74	65	65	9
23183514	The effect of simvastatin and fenofibrate on the e-pression of leukocyte adhesion molecules and lipopolysaccharide receptor CD14 in type 2 diabetes mellitus.	Stulc T, Ceska R, Marinov I, Skrha J.	Neuro Endocrinol Lett	51.8	18	49	6
23190521	Contribution of high flu- membranes to the therapy of uremia-associated dyslipidemia.	Azak A, Huddam B, Ã?nec K, Kocak G, Dede F, AylÄ± D, Duranay M.	Ther Apher Dial	59.1	999	300	14
23194490	Testosterone therapy during e-ercise rehabilitation in male patients with chronic heart failure who have low testosterone status: a double-blind randomized controlled feasibility study.	Stout M, Tew GA, Doll H, Zwierska I, Woodroofe N, Channer KS, Sa-ton JM.	Am Heart J	67.2	18	28	9
23197596	Detection rates of precancerous and cancerous cervical lesions within one screening round of primary human papillomavirus DNA testing: prospective randomised trial in Finland.	Leinonen MK, Nieminen P, Lonnberg S, Malila N, Hakama M, Pokhrel A, Laurila P, Tarkkanen J, Anttila A.	BMJ	999	999	132194	2
23198943	Chewing gums has stimulatory effects on bowel function in patients undergoing cesarean section: a randomized controlled trial.	Ledari FM, Barat S, Delavar MA.	Bosn J Basic Med Sci	28.2	999	100	15
23199586	Types of urethral catheter for reducing symptomatic urinary tract infections in hospitalised adults requiring short-term catheterisation: multicentre randomised controlled trial and economic evaluation of antimicrobial- and antiseptic-impregnated urethral catheters (the CATHETER trial).	Pickard R, Lam T, Maclennan G, Starr K, Kilonzo M, McPherson G, Gillies K, McDonald A, Walton K, Buckley B, Glazener C, Boachie C, Burr J, Norrie J, Vale L, Grant A, N'dow J.	Health Technol Assess	68.7	16	6394	19
23205751	Resistance, aerobic, and combination training on vascular function in overweight and obese adults.	Ho SS, Radavelli-Bagatini S, Dhaliwal SS, Hills AP, Pal S.	J Clin Hypertens (Greenwich)	53	999	64	4
23206451	Absence of clinically relevant interactions between rivaro-aban--an oral, direct Factor -a inhibitor--and digo-in or atorvastatin in healthy subjects.	Kubitza D, Becka M, Roth A, Mueck W.	J Int Med Res	34	18	20	3
23209576	Biological effects of add-on eicosapentaenoic acid supplementation in diabetes mellitus and co-morbid depression: a randomized controlled trial.	Mocking RJ, Assies J, Bot M, Jansen EH, Schene AH, Pouwer F.	PLoS One	54	18	25	5
23209840	Dose-related effects of alcohol on cognitive functioning.	Dry MJ, Burns NR, Nettelbeck T, Farquharson AL, White JM.	PLoS One	26.5	18	56	6
23211271	REMCARE: reminiscence groups for people with dementia and their family caregivers - effectiveness and cost-effectiveness pragmatic multicentre randomised trial.	Woods RT, Bruce E, Edwards RT, Elvish R, Hoare Z, Hounsome B, Keady J, Moniz-Cook ED, Orgeta V, Orrell M, Rees J, Russell IT.	Health Technol Assess	77.5	999	488	6
23212058	L-methylfolate as adjunctive therapy for SSRI-resistant major depression: results of two randomized, double-blind, parallel-sequential trials.	Papakostas GI, Shelton RC, Zajecka JM, Etemad B, Rickels K, Clain A, Baer L, Dalton ED, Sacco GR, Schoenfeld D, Pencina M, Meisner A, Bottiglieri T, Nelson E, Mischoulon D, Alpert JE, Barbee JG, Zisook S, Fava M.	Am J Psychiatry	47.9	18	148	5
23212859	Effect of timing of dialysis commencement on clinical outcomes of patients with planned initiation of peritoneal dialysis in the IDEAL trial.	Johnson DW, Wong MG, Cooper BA, Branley P, Bulfone L, Collins JF, Craig JC, Fraenkel MB, Harris A, Kesselhut J, Li JJ, Lu-ton G, Pilmore A, Tiller DJ, Harris DC, Pollock CA.	Perit Dial Int	61.5	18	466	21
23213511	Randomized, Double-Blind, Placebo-Controlled Study to Assess the Efficacy of Nonopioid Analgesics on Pain following Arthroscopic Knee Surgery.	Abdulla S, Eckhardt R, Netter U, Abdulla W.	Pain Res Treat	46.2	18	120	13
23220732	A 72-week randomized study of the safety and efficacy of a stavudine to zidovudine switch at 24 weeks compared to zidovudine or tenofovir disopro-il fumarate when given with lamivudine and nevirapine.	Phanuphak N, Ananworanich J, Teeratakulpisarn N, Jadwattanakul T, Kerr SJ, Chomchey N, Hongchookiat P, Mathajittiphun P, Pinyakorn S, Rungrojrat P, Praihirunyakit P, Gerschenson M, Phanuphak P, Valcour V, Kim JH, Shikuma C; SEARCH 003 Study Group.	Antivir Ther	37.3	999	62	1
23220812	Effectiveness of dry needling for the treatment of temporomandibular myofascial pain: a double-blind, randomized, placebo controlled study.	DÄ±racoÄ?lu D, Vural M, Karan A, Aksoy C.	J Back Musculoskelet Rehabil	34.4	999	50	13
23224924	Improvement of ventricular function in systolic heart failure patients with oral L-citrulline supplementation.	Balderas-Munoz K, Castillo-MartÃ­nez L, Orea-Tejeda A, Infante-VÃ¡zquez O, Utrera-Lagunas M, MartÃ­nez-Memije R, Keirns-Davis C, Becerra-Luna B, SÃ¡nchez-Vidal G.	Cardiol J	67.1	18	35	9
23226845	Therapeutic efficacy of add-on yogasana intervention in stabilized outpatient schizophrenia: Randomized controlled comparison with e-ercise and waitlist.	Varambally S, Gangadhar BN, Thirthalli J, Jagannathan A, Kumar S, Venkatasubramanian G, Muralidhar D, Subbakrishna DK, Nagendra HR.	Indian J Psychiatry	999	999	119	5
23235967	Is intravenous urography required when ultrasonography and KUB evidence a ureteroscopy plan?	Aghamir SM, Modaresi SS, Salavati A, Aloosh M, Meysami AP.	Urol J	43	999	139	14
23238504	Does preoperative radiotherapy with postoperative chemotherapy increase acute side-effects and postoperative complications of total mesorectal e-cision? Report of the randomized finnish rectal cancer trial.	SalmenkylÃ¤ S, Kouri M, Osterlund P, Pukkala E, Luukkonen P, Hyoty M, PÃ¤Ã¤kkonen M, MÃ¤kelÃ¤ J, Mustonen H, JÃ¤rvinen HJ.	Scand J Surg	62	999	278	2
23239249	Impact of a provider job aid intervention on injectable contraceptive continuation in South Africa.	Baumgartner JN, Morroni C, Mlobeli RD, Otterness C, Buga G, Chen M.	Stud Fam Plann	21.5	15	1449	4
23241329	Participant e-periences from chronic administration of a multivitamin versus placebo on subjective health and wellbeing: a double-blind qualitative analysis of a randomised controlled trial.	Sarris J, Co- KH, Camfield DA, Scholey A, Stough C, Fogg E, Kras M, White DJ, Sali A, Pipingas A.	Nutr J	31	20	114	4
23244155	Psychoeducation intervention to improve adjustment to cancer among Turkish stage I-II breast cancer patients: a randomized controlled trial.	Dastan NB, Buzlu S.	Asian Pac J Cancer Prev	48.3	18	88	2
23244539	Inulin-enriched pasta improves intestinal permeability and modifies the circulating levels of zonulin and glucagon-like peptide 2 in healthy young volunteers.	Russo F, Linsalata M, Clemente C, Chiloiro M, Orlando A, Marconi E, Chimienti G, Riezzo G.	Nutr Res	18.8	999	20	4
23248658	Salivary Streptococcus mutans and Lactobacilli levels following probiotic cheese consumption in adults: A double blind randomized clinical trial(*).	Mortazavi S, Akhlaghi N.	J Res Med Sci	28.3	999	60	11
23248832	Effects of using simulation versus CD-ROM in the performance of ultrasound-guided regional anesthesia.	Gasko J, Johnson A, Sherner J, Craig J, Gegel B, Burgert J, Sama S, Franzen T.	AANA J	999	999	29	22
23249323	The effect of two lottery-style incentives on response rates to postal questionnaires in a prospective cohort study in preschool children at high risk of asthma: a randomized trial.	van der Mark LB, van Wonderen KE, Mohrs J, Bindels PJ, Puhan MA, Ter Riet G.	BMC Med Res Methodol	2.3	1	771	10
23249846	Telephone intervention to improve the mental health of community-dwelling women abused by their intimate partners: a randomised controlled trial.	Tiwari A, Yuk H, Pang P, Fong DY, Yuen F, Humphreys J, Bullock L.	Hong Kong Med J	38.1	999	200	5
23252525	Randomized trial of tocilizumab in systemic juvenile idiopathic arthritis.	De Benedetti F, Brunner HI, Ruperto N, Kenwright A, Wright S, Calvo I, Cuttica R, Ravelli A, Schneider R, Woo P, Wouters C, -avier R, Zemel L, Baildam E, Burgos-Vargas R, Dolezalova P, Garay SM, Merino R, Joos R, Grom A, Wulffraat N, Zuber Z, et al.	N Engl J Med	9.7	2	112	13
23253713	Small laser spot versus standard laser spot photodynamic therapy for idiopathic choroidal neovascularization: a randomized controlled study.	Li --, Tao Y.	Chin Med J (Engl)	33.2	999	52	7
23265037	Effects of preoperative single dose Etorico-ib on postoperative pain and sleep after lumbar diskectomy: prospective randomized double blind controlled study.	Srivastava S, Gupta D, Naz A, Rizvi MM, Singh PK.	Middle East J Anesthesiol	39.8	18	44	22
23266743	Effect on LDL-cholesterol of a large dose of a dietary supplement with plant e-tracts in subjects with untreated moderate hypercholesterolaemia: a randomised, double-blind, placebo-controlled study.	Barrat E, ZaÃ¯r Y, Sirvent P, Chauveau P, Maudet C, Housez B, Derbord E, Lescuyer JF, Bard JM, Cazaubiel M, Peltier SL.	Eur J Nutr	51.1	18	45	4
23268821	Comparison of short term clinical outcomes between transtibial and transportal TransFi-Â® femoral fi-ation in hamstring ACL reconstruction.	Mirzatolooei F.	Acta Orthop Traumatol Turc	26.7	999	166	13
23271905	High pressure versus high intensity noninvasive ventilation in stable hypercapnic chronic obstructive pulmonary disease: a randomized crossover trial.	Murphy PB, Brignall K, Moxham J, Polkey MI, Davidson AC, Hart N.	Int J Chron Obstruct Pulmon Dis	71	999	7	10
23277857	The Impact of Virtual Reality Distraction on Pain and An-iety during Dental Treatment in 4-6 Year-Old Children: a Randomized Controlled Clinical Trial.	Asl Aminabadi N, Erfanparast L, Sohrabi A, Ghertasi Oskouei S, Naghili A.	J Dent Res Dent Clin Dent Prospects	5.4	4	120	22
23279371	Randomized Controlled Trial on the Efficacy of Bilateral Superficial Cervical Ple-us Block in Thyroidectomy.	Karthikeyan VS, Sistla SC, Badhe AS, Mahalakshmy T, Rajkumar N, Ali SM, Gopalakrishnan S.	Pain Pract	37.7	18	60	13
23285019	Modulation of protein fermentation does not affect fecal water to-icity: a randomized cross-over study in healthy subjects.	Windey K, De Preter V, Louat T, Schuit F, Herman J, Vansant G, Verbeke K.	PLoS One	999	999	20	11
23285070	Effects of L-dopa during auditory instrumental learning in humans.	Weis T, Puschmann S, Brechmann A, Thiel CM.	PLoS One	28.5	25	55	5
23285271	The effectiveness of an online support group for members of the community with depression: a randomised controlled trial.	Griffiths KM, Mackinnon AJ, Crisp DA, Christensen H, Bennett K, Farrer L.	PLoS One	43.9	18	298	5
23290323	Effects of co-occurring depression on treatment for an-iety disorders: analysis of outcomes from a large primary care effectiveness trial.	Campbell-Sills L, Sherbourne CD, Roy-Byrne P, Craske MG, Sullivan G, Bystritsky A, Lang AJ, Chavira DA, Rose RD, Shaw Welch S, Stein MB.	J Clin Psychiatry	43.5	18	1004	5
23301240	Effectiveness of Herbal and Fluoridated Toothpaste on Plaque and Gingival Scores Among Residents of a Working Women's Hostel - A Randomised Controlled Trial.	Hebbal M, Ankola AV, Sharma R, Johri S.	Oral Health Prev Dent	21.7	18	55	22
23304972	Subjective symptoms of RME patients treated with three different screw activation protocols: a randomised clinical trial.	HalicioÄ?lu K, Kiki A, Yavuz I.	Aust Orthod J	13.5	10	60	22
23351842	The effect of Camellia Sinensis (green tea) mouthwash on plaque-induced gingivitis: a single-blinded randomized controlled clinical trial.	Jenabian N, Moghadamnia AA, Karami E, Mir A PB.	Daru	999	14	50	11
23356032	Primary results of clinical trial for uniform multidrug therapy for leprosy patients in Brazil (U-MDT/CT-BR): reactions frequency in multibacillary patients.	Penna ML, Buhrer-Sekula S, Pontes MA, Cruz R, Goncalves Hde S, Penna GO.	Lepr Rev	40.2	6	613	1
23359648	Nedaplatin/Gemcitabine Versus Carboplatin/Gemcitabine in Treatment of Advanced Non-small Cell Lung Cancer: A Randomized Clinical Trial.	Yang JJ, Zhou Q, Liao RQ, Huang YS, -u CR, Wang Z, Wang BC, Chen HJ, Wu YL.	Chin J Cancer Res	57.1	999	49	2
23368904	Usefulness of a continuous suction mouthpiece during percutaneous endoscopic gastrostomy: A single-center, prospective, randomized study.	Maekita T, Kato J, Nakatani Y, Enomoto S, Kayama T, Tsuji M, Nakaya T, Muraki Y, Deguchi H, Ueda K, Inoue I, Iguchi M, Tamai H, Ichinose M.	Dig Endosc	80.5	999	72	11
23427383	Effect of Liandouqingmai Recipe on life quality and vascular endothelial injury in patients with coronary heart disease.	Zhu H, Lu S, Su W, Gong S, Zhang Z, Li P.	J Tradit Chin Med	70.5	999	101	9
23427390	Irritable bowel syndrome treated by traditional Chinese spinal orthopedic manipulation.	Qu L, -ing L, Norman W, Chen H, Gao S.	J Tradit Chin Med	37.5	18	210	11
23451439	Comparison of clinical and radiographic outcomes between minimally invasive lateral approach and mini-midvastus approach in total knee arthroplasty.	Siramanakul C, Sriphirom P.	J Med Assoc Thai	999	999	28	13
23457130	Comparison of two doses of trane-amic acid on bleeding and surgery site quality during sinus endoscopy surgery.	Abbasi H, Behdad S, Ayatollahi V, Nazemian N, Mirshamsi P.	Adv Clin E-p Med	35.1	999	70	11
23461076	A prospective clinical multicentre study on adult pulmonary Langerhans' cell histiocytosis.	Schonfeld N, Dirks K, Costabel U, Loddenkemper R; Wissenschaftliche Arbeitsgemeinschaft fur die Therapie von Lungenkrankheiten.	Sarcoidosis Vasc Diffuse Lung Dis	38	18	77	10
23486850	The effect of warm-up and cool-down e-ercise on delayed onset muscle soreness in the quadriceps muscle: a randomized controlled trial.	Olsen O, SjÃ¸haug M, van Beekvelt M, Mork PJ.	J Hum Kinet	22.7	20	36	13
23488361	Nurse practitioners in postoperative cardiac surgery: are they effective?	Goldie CL, Prodan-Bhalla N, Mackay M.	Can J Cardiovasc Nurs	66	18	103	21
23540189	Effect of short-term recombinant human erythropoietin therapy in the prevention of anemia of prematurity in very low birth weight neonates.	Yasmeen BH, Chowdhury MA, Hoque MM, Hossain MM, Jahan R, Akhtar S.	Bangladesh Med Res Counc Bull	0	0	47	16
23565404	Efficacy and safety of rapid escalation of cabergoline in comparison to conventional regimen for macroprolactinoma: A prospective, randomized trial.	Rastogi A, Walia R, Dutta P, Bhansali A.	Indian J Endocrinol Metab	999	999	38	4
23610690	A randomised control trial to evaluate the efficacy of autologous blood injection versus local corticosteroid injection for treatment of lateral epicondylitis.	Dojode CM.	Bone Joint Res	42.6	15	60	13
